# Supplementary material for: Structural diversity of mixed polypnictogen complexes: dicationic E2E′2 (E ≠ E′ = P, As, Sb, Bi) chains, cycles and cages stabilized by transition metals
Source: Royal Society of Chemistry journal article supplement (doi:10.1039/d1sc04924k), 2021-01-01
Supplement: d1sc04924k1.pdf [file d1sc04924k1.pdf]

# Structural Diversity of Mixed Polypnictogen Complexes: Dicationic $E_2E'_2$ ( $E \neq E' = P, As, Sb, Bi$ ) Chains, Cycles and Cages Stabilized by Transition Metals

## – SUPPORTING INFORMATION –

Luis Dütsch, Christoph Riesinger, Gábor Balázs, Michael Seidl, and Manfred Scheer\*

Institute of Inorganic Chemistry  
University of Regensburg  
D-93040 Regensburg  
Germany

Email: manfred.scheer@ur.de

### Contents

|       |                                                                                                                                                                                                        |    |
|-------|--------------------------------------------------------------------------------------------------------------------------------------------------------------------------------------------------------|----|
| 1     | General considerations.....                                                                                                                                                                            | 3  |
| 2     | Experimental details.....                                                                                                                                                                              | 4  |
| 2.1   | Synthesis of [Thia] <sup>+</sup> with [TEF <sup>Cl</sup> ] <sup>-</sup> as counterion.....                                                                                                             | 4  |
| 2.2   | Oxidation of <b>A–E</b> with [Thia][TEF].....                                                                                                                                                          | 4  |
| 2.2.1 | Preparation of [{CpMo(CO) <sub>2</sub> }] <sub>4</sub> (μ <sub>4</sub> ,η <sup>2</sup> :η <sup>2</sup> :η <sup>2</sup> :η <sup>2</sup> -AsPPAs)][TEF] <sub>2</sub> ( <b>1</b> ).....                   | 4  |
| 2.2.2 | Preparation of [{CpMo(CO) <sub>2</sub> }] <sub>4</sub> (μ <sub>4</sub> ,η <sup>2</sup> :η <sup>2</sup> :η <sup>2</sup> :η <sup>2</sup> -SbPPSb)][TEF] <sub>2</sub> ( <b>2</b> ).....                   | 5  |
| 2.2.3 | Preparation of [{CpMo(CO) <sub>2</sub> }] <sub>4</sub> (μ <sub>4</sub> ,η <sup>2</sup> :η <sup>2</sup> :η <sup>2</sup> :η <sup>2</sup> -AsSbSbAs)][TEF] <sub>2</sub> ( <b>3a</b> ).....                | 6  |
| 2.2.4 | Preparation of [{CpMo(CO) <sub>2</sub> }] <sub>4</sub> (μ <sub>4</sub> ,η <sup>2</sup> :η <sup>2</sup> :η <sup>2</sup> :η <sup>2</sup> -AsBiBiAs)][TEF] <sub>2</sub> ( <b>4a</b> ).....                | 6  |
| 2.2.5 | Preparation of [{CpMo(CO) <sub>2</sub> }] <sub>4</sub> (μ <sub>4</sub> ,η <sup>2</sup> :η <sup>2</sup> :η <sup>2</sup> :η <sup>2</sup> -BiSbSbBi)][TEF] <sub>2</sub> ( <b>5</b> ).....                 | 6  |
| 2.3   | Oxidation of <b>C</b> and <b>D</b> with [Thia][TEF <sup>Cl</sup> ].....                                                                                                                                | 7  |
| 2.3.1 | Preparation of [{CpMo(CO) <sub>2</sub> }] <sub>4</sub> (μ <sub>4</sub> ,η <sup>2</sup> :η <sup>2</sup> :η <sup>2</sup> :η <sup>2</sup> -AsSbAsSb)][TEF <sup>Cl</sup> ] <sub>2</sub> ( <b>3b</b> )..... | 7  |
| 2.3.2 | Preparation of [{CpMo(CO) <sub>2</sub> }] <sub>4</sub> (μ <sub>4</sub> ,η <sup>2</sup> :η <sup>2</sup> :η <sup>2</sup> :η <sup>2</sup> -AsBiBiAs)][TEF <sup>Cl</sup> ] <sub>2</sub> ( <b>4b</b> )..... | 7  |
| 3     | Cyclovoltammetry.....                                                                                                                                                                                  | 8  |
| 3.1.1 | CV of <b>A</b> .....                                                                                                                                                                                   | 8  |
| 3.1.2 | CV of <b>B</b> .....                                                                                                                                                                                   | 9  |
| 3.1.3 | CV of <b>C</b> .....                                                                                                                                                                                   | 10 |
| 3.1.4 | CV of <b>D</b> .....                                                                                                                                                                                   | 11 |

|       |                                                          |    |
|-------|----------------------------------------------------------|----|
| 3.1.5 | CV of <b>E</b> .....                                     | 12 |
| 4     | NMR spectra .....                                        | 13 |
| 5     | Mass spectrometry .....                                  | 25 |
| 5.1   | ESI mass spectrometry of [Thia][TEF <sup>Cl</sup> ]..... | 25 |
| 5.2   | ESI mass spectrometry of <b>1</b> : .....                | 27 |
| 5.3   | ESI mass spectrometry of <b>3a</b> : .....               | 30 |
| 5.4   | ESI mass spectrometry of <b>3b</b> : .....               | 31 |
| 6     | EPR spectra .....                                        | 33 |
| 7     | X-ray crystallography .....                              | 37 |
| 8     | Details of DFT Calculations .....                        | 47 |

## 1 General considerations

All manipulations were carried out under an inert atmosphere of dried nitrogen/argon using standard Schlenk and glovebox techniques. The used Schlenk flask were heated at 550 °C for at least 15-30 minutes under reduced pressure prior to use to get rid of water traces adhered to the glass surface. The starting materials Li[TEF<sup>Cl</sup>],<sup>1</sup> [Thia][TEF],<sup>2</sup> and [{CpMo(CO)<sub>2</sub>]<sub>2</sub>(μ,η<sup>2</sup>:η<sup>2</sup>-EE')] (EE' = PAs (**A**), PSb (**B**), AsSb (**C**), AsBi (**D**), SbBi(**E**))<sup>3</sup> were synthesized via the respective literature procedures. The reagents thianthrene and [NO][SbF<sub>6</sub>] are commercially available and were used without further purification. Solvents were freshly distilled under nitrogen after drying over CaH<sub>2</sub> (CH<sub>2</sub>Cl<sub>2</sub>, CD<sub>2</sub>Cl<sub>2</sub>), K or Na/K alloy (alkanes), P<sub>4</sub>O<sub>10</sub> (*ortho*-difluorobenzene = *o*-DFB) or NaH (toluene). Dried solvents were also taken from a solvent purification system from MBraun. For reactions in liquid SO<sub>2</sub>, SO<sub>2</sub> gas cylinders were bought from Linde and SO<sub>2</sub> was condensed into Schlenk flasks with a Young valve at -196 °C under reduced pressure. Diatomaceous earth used for filtrations was stored at 130 °C for at least 24 h prior to use. NMR spectra were recorded at 300 K (if not stated otherwise) on a Bruker Avance 300 MHz NMR spectrometer (<sup>1</sup>H: 300.132 MHz, <sup>31</sup>P: 121.495 MHz, <sup>13</sup>C: 75.468 MHz, <sup>19</sup>F: 282.404 MHz) or a Bruker Avance 400 MHz NMR spectrometer (<sup>1</sup>H: 400.130 MHz, <sup>31</sup>P: 161.976 MHz, <sup>13</sup>C: 100.613 MHz, <sup>19</sup>F: 376.498 MHz) with external references of SiMe<sub>4</sub> (<sup>1</sup>H, <sup>13</sup>C), CCl<sub>3</sub>F (<sup>19</sup>F) and H<sub>3</sub>PO<sub>4</sub> (85%, <sup>31</sup>P). The chemical shifts  $\delta$  are presented in parts per million (ppm) and coupling constants  $J$  in Hz. X-Band EPR spectra were recorded on a MiniScope MS400 device from Magnettech GmbH with a frequency of 9.5 GHz equipped with a rectangular resonator TE102. Cyclic voltammetry (CV) measurements were performed in CH<sub>2</sub>Cl<sub>2</sub> solution containing [NBu<sub>4</sub>][PF<sub>6</sub>] ( $c = 0.1 \text{ mol}\cdot\text{L}^{-1}$ ) as supporting electrolyte. Ferrocene (Cp<sub>2</sub>Fe) was added to the samples after the complete measurements and Cp<sub>2</sub>Fe was used as an internal reference ( $E(\text{Cp}_2\text{Fe}^{0/+}) = 0 \text{ V}$ ). ESI-MS spectra were either measured on a Finnigan Thermoquest TSQ 7000 mass-spectrometer by the MS department of the University of Regensburg or on a Waters Micromass LCT ESI-TOF mass-spectrometer by the first author. IR spectra were recorded either as solids using a ThermoFisher Nicolet iS5 FT-IR spectrometer with an iD7 ATR module and an ITX Germanium or ITX Diamond crystal, or grinded together with dried KBr and pressed to pellets and measured on a VARIAN FTS-800 FR-IR spectrometer. Elemental analyses (EA) were performed by the micro analytical laboratory of the University of Regensburg.

## 2 Experimental details

### 2.1 Synthesis of [Thia]<sup>+</sup> with [TEF<sup>Cl</sup>]<sup>-</sup> as counterion

In order to vary the weakly coordinating anion (= WCA) of the desired products and to investigate their influence on the solid-state structures, the used strong one-electron oxidant thianthrenium [C<sub>12</sub>H<sub>8</sub>S<sub>2</sub>]<sup>+</sup> (= [Thia]<sup>+</sup>,  $E^0 = 0.86$  V vs Cp<sub>2</sub>Fe<sup>0/+</sup>)<sup>4</sup> was synthesized with the WCA [Al{OC(CF<sub>3</sub>)<sub>2</sub>(CCl<sub>3</sub>)<sub>2</sub>}]<sub>4</sub><sup>-</sup> (= [TEF<sup>Cl</sup>]<sup>-</sup>). A simple one-step synthesis starting from commercially available reagents afford the deep purple salt [Thia][TEF<sup>Cl</sup>] in excellent yields and in a multigram scale (Scheme S1). The reaction is performed in liquid SO<sub>2</sub> to ensure the solubility of all components.

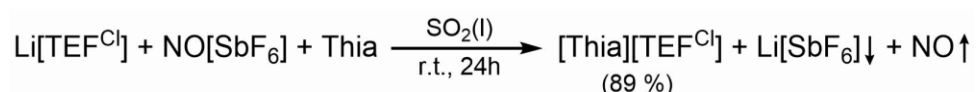

Scheme S1: Synthesis of [Thia][TEF<sup>Cl</sup>].

A Schlenk flask equipped with a Young valve was loaded with a stirring bar, thianthrene (1.00 g, 4.62 mmol, 1.0 eq.), NO[SbF<sub>6</sub>] (1.22 g, 4.59 mmol, 1 eq.) and Li[TEF<sup>Cl</sup>] (5.44 g, 4.65 mmol, 1.0 eq.). 60 mL SO<sub>2</sub> were condensed onto these solids under reduced pressure at -196 °C. The flask was closed under reduced pressure and the cooling was removed. Upon dissolution the reaction turns from light blue to dark blue and finally to dark violet. After stirring at room temperature for 24 h the SO<sub>2</sub> was removed. The residue was dissolved/suspended in 30 mL CH<sub>2</sub>Cl<sub>2</sub> and transferred onto a frit with diatomaceous earth. The dark purple solution was filtered, and the residue washed with CH<sub>2</sub>Cl<sub>2</sub> till the filtrate is colourless. The amount of solvent was reduced to 15 mL and addition of 200 mL *n*-hexane leads to precipitation of dark purple [Thia][TEF<sup>Cl</sup>], which was washed twice with 60 mL of a 1:1 mixture of *n*-hexane/toluene. Recrystallization via layering a CH<sub>2</sub>Cl<sub>2</sub> solution with *n*-hexane (1:6) affords dark purple crystals. These were washed again with 50 mL toluene and dried in vacuum for 3 hours. Yield 5.61 g (4.06 mmol = 89 %). <sup>1</sup>H NMR (400 MHz, CD<sub>2</sub>Cl<sub>2</sub>) no signals detectable for [Thia]<sup>+</sup>; <sup>19</sup>F{<sup>1</sup>H} NMR (282.4 MHz, CD<sub>2</sub>Cl<sub>2</sub>) δ/ppm = -67.4 (s). Anal. calcd. for [Thia][TEF<sup>Cl</sup>]: C: 24.35; H: 0.58; S: 4.64; found: C: 24.61, H: 0.68, S: 4.72. Positive ion ESI-MS *m/z* (%): 215.97 (100) [Thia]<sup>+</sup>. Negative ion ESI-MS *m/z* (%): 1162.59 (100) [TEF<sup>Cl</sup>]<sup>-</sup>.

### 2.2 Oxidation of A–E with [Thia][TEF]

#### 2.2.1 Preparation of [{CpMo(CO)<sub>2</sub>}]<sub>4</sub>(μ<sub>4</sub>,η<sup>2</sup>:η<sup>2</sup>:η<sup>2</sup>:η<sup>2</sup>-AsPPAs)[TEF]<sub>2</sub> (1)

A dark purple solution of [Thia][TEF] (203 mg, 0.17 mmol, 1.0 eq.) in 15 mL CH<sub>2</sub>Cl<sub>2</sub> was transferred to an orange red solution of [{CpMo(CO)<sub>2</sub>}]<sub>2</sub>(μ,η<sup>2</sup>:η<sup>2</sup>-PAs) (A) (98 mg, 0.18 mmol, 1.05 eq.) in 10 mL CH<sub>2</sub>Cl<sub>2</sub> at room temperature causing an immediate colour change to a dark greenish red solution. After stirring for 120 minutes, addition of 60 mL *n*-hexane led to precipitation of a dark green powder of crude **1**. The slightly orange supernatant solution was removed and the precipitate washed twice with 20 mL of pure toluene. The crude product was dried in vacuum. Recrystallization via layering a CH<sub>2</sub>Cl<sub>2</sub> solution with *n*-hexane (1:5) and storage at +4 °C afforded pure **1** as dark red blocks, which were suitable for single crystal X-ray diffraction. The supernatant was removed and the crystals were dried in vacuum. Yield 189 mg (0.062 mmol =

73 %).  $^1\text{H}$  NMR (300 MHz,  $\text{CD}_2\text{Cl}_2$ )  $\delta/\text{ppm}$  = 5.66 (s, Cp).  $^{31}\text{P}\{^1\text{H}\}$  NMR (121.5 MHz,  $\text{CD}_2\text{Cl}_2$ )  $\delta/\text{ppm}$  = -28.8 (s).  $^{31}\text{P}$  NMR (121.5 MHz,  $\text{CD}_2\text{Cl}_2$ )  $\delta/\text{ppm}$  = -29.1 (s); for  $^{31}\text{P}\{^1\text{H}\}$  VT-NMR see NMR section below.  $^{13}\text{C}\{^1\text{H}\}$  NMR (75.5 MHz,  $\text{CD}_2\text{Cl}_2$ )  $\delta/\text{ppm}$  = 219.2 (small, br, CO), 121.65 (q,  $^1J_{\text{CF}}$  = 293 Hz;  $\text{CF}_3$ ), 90.98 (s, Cp).  $^{19}\text{F}\{^1\text{H}\}$  NMR (282.4 MHz,  $\text{CD}_2\text{Cl}_2$ )  $\delta/\text{ppm}$  = -75.5 (s,  $\text{CF}_3$ ). Compound **1** is silent in the X-band EPR spectra in the solid-state and in  $\text{CH}_2\text{Cl}_2$  solution at room temperature and at 77 K. Anal. calcd. for  $[(\text{C}_{14}\text{H}_{10}\text{O}_4\text{Mo}_2\text{PAs})_2][\text{TEF}]_2$ : C: 23.91; H: 0.67. Found: (crystalline product **1**): C: 24.26; H: 0.82. Positive ion ESI-MS  $m/z$  (%): 539.63 (15)  $[\text{A}]^+$ , 511.71 (3)  $[\text{A}-1\cdot\text{CO}]^+$ , 483.68 (37)  $[\text{A}-2\cdot\text{CO}]^+$ , 455.68 (100)  $[\text{A}-3\cdot\text{CO}]^+$ , 427.69 (70)  $[\text{A}-4\cdot\text{CO}]^+$ ; in very concentrated solutions: 511,71 (5)  $[\text{A}-1\cdot\text{CO}]_2^{2+}$ . Negative ion ESI-MS  $m/z$  (%): 966.9 (100)  $[\text{TEF}]^-$ . **1** (crystalline): IR(KBr)  $\tilde{\nu}/\text{cm}^{-1}$  = 3136 (w), 2344 (vw), 2062(s), 2050 (s), 2032 (vs), 1991 (s), 1955 (m), 1624 (vw), 1426 (w), 1354 (s), 1302 (vs), 1277 (vs), 1243 (vs), 1219 (vs), 1172 (m), 973 (vs), 841 (m), 727 (s). **1** (precipitate): IR(KBr)  $\tilde{\nu}/\text{cm}^{-1}$  = 3133 (w), 2960 (vw), 2925 (w), 2854 (vw), 2360 (w), 2343 (w), 2062 (s), 2051 (vs), 2037 (vs), 2023 (vs), 1995 (s, br), 1955 (m, br), 1627 (w), 1426 (w), 1384 (w), 1353 (m), 1302 (vs), 1277 (vs), 1244 (vs), 1220 (vs), 1173 (m), 974 (vs), 841 (m), 728 (s).

### 2.2.2 Preparation of $[(\text{CpMo}(\text{CO})_2)_4(\mu_4, \eta^2:\eta^2:\eta^2\text{-SbPPSb})][\text{TEF}]_2$ (**2**)

A dark purple solution of [Thia][TEF] (121 mg, 0.10 mmol, 1.0 eq.) in 7 mL  $\text{CH}_2\text{Cl}_2$  was transferred to an orange red solution of  $[(\text{CpMo}(\text{CO})_2)_2(\mu, \eta^2:\eta^2\text{-PSb})]$  (**B**) (60 mg, 0.10 mmol, 1.0 eq.) in 3 mL  $\text{CH}_2\text{Cl}_2$  at room temperature causing an immediate colour change to a dark orange brown solution. After stirring for 30 minutes, addition of 40 mL *n*-hexane led to precipitation of a brown, fluffy powder of crude **2**. The slightly orange supernatant solution was removed and the precipitate washed twice with 20 mL of pure toluene leading to an oily solid. The crude product was dried in vacuum, redissolved in 5 mL  $\text{CH}_2\text{Cl}_2$  and precipitated with 30 mL *n*-hexane yielding again a fluffy, brown powder. Recrystallization via layering a  $\text{CH}_2\text{Cl}_2$  solution with *n*-hexane (1:5) and storage at +4 °C afforded pure **2** as thin orange red plates, which were not suitable for good single crystal X-ray diffraction (several attempts to get suitable crystals by changing the solvents, crystallization methods or crystallization temperatures were unsuccessful). The supernatant was removed and the crystals were dried in vacuum. Yield 137 mg (0.044 mmol = 88 %).  $^1\text{H}$  NMR (400 MHz,  $\text{CD}_2\text{Cl}_2$ )  $\delta/\text{ppm}$  = 5.61 (s, Cp).  $^{31}\text{P}\{^1\text{H}\}$  NMR (162.0 MHz,  $\text{CD}_2\text{Cl}_2$ )  $\delta/\text{ppm}$  = 34.7 (s).  $^{31}\text{P}$  NMR (162.0 MHz,  $\text{CD}_2\text{Cl}_2$ )  $\delta/\text{ppm}$  = 34.6 (s).  $^{19}\text{F}\{^1\text{H}\}$  NMR (376.6 MHz,  $\text{CD}_2\text{Cl}_2$ )  $\delta/\text{ppm}$  = -75.5 (s).  $^{31}\text{P}\{^1\text{H}\}$  NMR of crude solution of **2** (162.0 MHz,  $\text{CH}_2\text{Cl}_2/\text{C}_6\text{D}_6$ )  $\delta/\text{ppm}$  = 35.0 (s).  $^{31}\text{P}$  NMR of crude solution of **2** (162.0 MHz,  $\text{CH}_2\text{Cl}_2/\text{C}_6\text{D}_6$ )  $\delta/\text{ppm}$  = 35.0 (s); for  $^{31}\text{P}\{^1\text{H}\}$  VT-NMR see NMR section below. Compound **2** is silent in the X-band EPR spectra in  $\text{CH}_2\text{Cl}_2$  solution at room temperature and at 77 K. Anal. calcd. for  $[(\text{C}_{14}\text{H}_{10}\text{O}_4\text{Mo}_2\text{PSb})_2][\text{TEF}]_2\cdot(\text{toluene})_{0.7}$ : C: 24.57; H: 0.81. Found: C: 24.55; H: 0.60. Mass spectrometric investigations were unsuccessful due to decomposition of **2** during the measurement.

### 2.2.3 Preparation of $[(\text{CpMo}(\text{CO})_2)_4(\mu_4, \eta^2:\eta^2:\eta^2\text{-AsSbSbAs})][\text{TEF}]_2$ (**3a**)

A dark purple solution of [Thia][TEF] (56 mg, 0.048 mmol, 1.0 eq.) in 7 mL  $\text{CH}_2\text{Cl}_2$  was transferred to a red solution of  $[(\text{CpMo}(\text{CO})_2)_2(\mu, \eta^2:\eta^2\text{-AsSb})]$  (**C**) (41 mg, 0.048 mmol, 1.0 eq.) in 5 mL  $\text{CH}_2\text{Cl}_2$  at room temperature causing an immediate colour change to a dark greenish brown solution. After stirring for 15 minutes, addition

of 50 mL *n*-hexane led to precipitation of a green to black powder. The slightly orange supernatant solution was removed and the precipitate washed twice with 30 mL of pure toluene. Recrystallization via layering a CH<sub>2</sub>Cl<sub>2</sub> solution with *n*-hexane (1:5) and storage at +4 °C afforded pure **3a** as dark red to black blocks, which were suitable for single crystal X-ray diffraction. The supernatant was removed and the crystals were dried in vacuum. Yield 70 mg (0.022 mmol = 92 %). <sup>1</sup>H NMR (400 MHz, CD<sub>2</sub>Cl<sub>2</sub>) δ/ppm = 5.68 (s, Cp). <sup>19</sup>F{<sup>1</sup>H} NMR (376.5 MHz, CD<sub>2</sub>Cl<sub>2</sub>) δ/ppm = -75.5 (s, CF<sub>3</sub>). Compound **3a** is silent in the X-band EPR spectra in CH<sub>2</sub>Cl<sub>2</sub> solution at room temperature, but shows a very weak axial signal (*g*<sub>iso</sub> = 1.954) at 77 K. Anal. calcd. for [(C<sub>14</sub>H<sub>10</sub>O<sub>4</sub>Mo<sub>2</sub>AsSb)<sub>2</sub>][TEF]<sub>2</sub>: C: 22.55; H: 0.63. Found: C: 22.94; H: 0.72. Positive ion ESI-MS *m/z* (%): 629.63 (80) [C]<sup>+</sup>, 601.67 (3) [C-CO]<sup>+</sup>, 573.68 (20) [C-2·CO]<sup>+</sup>, 545.67 (100) [C-3·CO]<sup>+</sup>, 517.68 (50) [C-4·CO]<sup>+</sup>. IR (ATR)  $\tilde{\nu}$ /cm<sup>-1</sup> = 2055 (w), 2048 (w), 2038 (w), 1999 (m), 1988 (m), 1961 (w), 1934 (vw), 1352 (w), 1297 (m), 1274 (s), 1240 (s), 1213 (vs), 1173 (w), 971 (vs), 841 (w), 727 (s); C-H around 3000 not observed (too small).

#### 2.2.4 Preparation of [{CpMo(CO)<sub>2</sub>]<sub>2</sub>(μ<sub>4</sub>,η<sup>2</sup>:η<sup>2</sup>:η<sup>2</sup>-AsBiBiAs)][TEF]<sub>2</sub> (**4a**)

A dark purple solution of [Thia][TEF] (118 mg, 0.10 mmol, 1.0 eq.) in 5 mL CH<sub>2</sub>Cl<sub>2</sub> was transferred to a dark red solution of [{CpMo(CO)<sub>2</sub>]<sub>2</sub>(μ,η<sup>2</sup>:η<sup>2</sup>-AsBi)] (**D**) (72 mg, 0.10 mmol, 1.0 eq.) in 3 mL CH<sub>2</sub>Cl<sub>2</sub> at room temperature causing an immediate colour change to a dark brown solution. After stirring for 30 minutes, addition of 40 mL *n*-pentane led to precipitation of a brown to black powder. The slightly orange supernatant solution was removed and the precipitate washed twice with 20 mL of pure toluene and twice with 20 mL *n*-pentane. The crude product was dried in vacuum and recrystallization via layering a CH<sub>2</sub>Cl<sub>2</sub> solution with *n*-hexane (1:5) and storage at room temperature under exclusion of light afforded pure **4a** as black blocks, which were suitable for single crystal X-ray diffraction. The supernatant was removed and the crystals were dried in vacuum. Yield 150 mg (0.0445 mmol = 89 %). <sup>1</sup>H NMR (400 MHz, CD<sub>2</sub>Cl<sub>2</sub>) δ/ppm = 5.69 (s, Cp). <sup>13</sup>C{<sup>1</sup>H} NMR (100.6 MHz, CD<sub>2</sub>Cl<sub>2</sub>) δ/ppm = 89.80 (s, Cp), 121.25 (q, <sup>1</sup>*J*<sub>CF</sub> = 291 Hz; CF<sub>3</sub>), 214.33 (s, CO), 215.65 (s, CO). <sup>19</sup>F{<sup>1</sup>H} NMR (376.6 MHz, CD<sub>2</sub>Cl<sub>2</sub>) δ/ppm = -75.5 (s, CF<sub>3</sub>). Compound **4a** is silent in the X-band EPR spectra in CH<sub>2</sub>Cl<sub>2</sub> solution at room temperature and at 77 K. Anal. calcd. for [(C<sub>14</sub>H<sub>10</sub>O<sub>4</sub>Mo<sub>2</sub>AsBi)<sub>2</sub>][TEF]<sub>2</sub>: C: 21.38; H: 0.60. Found: C: 21.82; H: 0.56. Positive ion ESI-MS *m/z* (%): 717.77 (100) [D]<sup>+</sup>, 734.77 (15) [D+O]<sup>+</sup>. Negative ion ESI-MS *m/z* (%): 966.91 (100) [TEF]<sup>-</sup>.

#### 2.2.5 Preparation of [{CpMo(CO)<sub>2</sub>]<sub>4</sub>(μ<sub>4</sub>,η<sup>2</sup>:η<sup>2</sup>:η<sup>2</sup>-BiSbSbBi)][TEF]<sub>2</sub> (**5**)

A dark purple solution of [Thia][TEF] (59 mg, 0.05 mmol, 1.0 eq.) in 10 mL *o*-DFB was transferred to a dark bordeaux red solution of [{CpMo(CO)<sub>2</sub>]<sub>2</sub>(μ,η<sup>2</sup>:η<sup>2</sup>-SbBi)] (**E**) (38 mg, 0.05 mmol, 1.0 eq.) in a mixture of 10 mL *o*-DFB and 1 mL CH<sub>2</sub>Cl<sub>2</sub> at -20 °C causing an immediate colour change to a dark brown to black solution. After stirring for 60 minutes at -20 °C, addition of 80 mL *n*-hexane led to precipitation of a dark green to black powder. The slightly red supernatant solution was removed and the precipitate washed twice with 20 mL of pure toluene. The crude product was dried in vacuum and recrystallization via layering an *o*-DFB solution with *n*-hexane (1:4) and storage at +4 °C afforded pure **5** as black blocks, which were suitable for single crystal X-ray diffraction. The supernatant was removed and the crystals were dried in vacuum. Yield 73 mg (0.021 mmol = 84 %). <sup>1</sup>H NMR (400 MHz, CD<sub>2</sub>Cl<sub>2</sub>) δ/ppm = 5.64 (s, Cp, traces of **XI**), 5.72 (s, Cp of **5**), 5.78 (s,

Cp, traces of **XII**).  $^{19}\text{F}\{^1\text{H}\}$  NMR (376.6 MHz,  $\text{CD}_2\text{Cl}_2$ )  $\delta/\text{ppm} = -75.5$  (s,  $\text{CF}_3$ ). Compound **5** is silent in the X-band EPR spectra in  $\text{CH}_2\text{Cl}_2$  solution at room temperature and at 77 K. Anal. calcd. for  $[(\text{C}_{14}\text{H}_{10}\text{O}_4\text{Mo}_2\text{SbBi})_2][\text{TEF}^{\text{Cl}}]_2$ : C: 20.80; H: 0.58. Found: C: 21.38; H: 0.45. Mass spectrometric investigations were unsuccessful due to decomposition of **5** during the measurement.

## 2.3 Oxidation of C and D with [Thia][TEF<sup>Cl</sup>]

### 2.3.1 Preparation of $[(\text{CpMo}(\text{CO})_2)_2(\mu_4, \eta^2:\eta^2:\eta^2\text{-AsSbAsSb})][\text{TEF}^{\text{Cl}}]_2$ (**3b**)

A dark purple solution of [Thia][TEF<sup>Cl</sup>] (89 mg, 0.065 mmol, 1.0 eq.) in 5 mL  $\text{CH}_2\text{Cl}_2$  was transferred to a red solution of  $[(\text{CpMo}(\text{CO})_2)_2(\mu, \eta^2:\eta^2\text{-AsSb})]$  (**C**) (41 mg, 0.065 mmol, 1.0 eq.) in 5 mL  $\text{CH}_2\text{Cl}_2$  at room temperature causing an immediate colour change to a dark brown solution. After stirring for 15 minutes, addition of 40 mL toluene led to precipitation of a dark greenish brown powder. The slightly brown supernatant solution was removed and the precipitate dried in vacuum. Recrystallization via layering a  $\text{CH}_2\text{Cl}_2$  solution with *n*-hexane (1:5) and storage at +4 °C afforded pure **3b** as dark red blocks, which were suitable for single crystal X-ray diffraction. The supernatant was removed and the crystals were dried in vacuum. Yield 89 mg (0.025 mmol = 77 %).  $^1\text{H}$  NMR (400 MHz,  $\text{CD}_2\text{Cl}_2$ )  $\delta/\text{ppm} = 5.70$  (s, Cp).  $^{19}\text{F}\{^1\text{H}\}$  NMR (376.6 MHz,  $\text{CD}_2\text{Cl}_2$ )  $\delta/\text{ppm} = -68.5$  (s,  $\text{CF}_3$ ). Anal. calcd. for  $[(\text{C}_{14}\text{H}_{10}\text{O}_4\text{Mo}_2\text{AsSb})_2][\text{TEF}^{\text{Cl}}]_2$ : C: 20.07; H: 0.56. Found: C: 20.31; H: 0.74. Positive ion ESI-MS  $m/z$  (%): 629.65 (100) [**C**]<sup>+</sup>, 584.7 (37) [**VI**]<sup>+</sup>, 573.7 (8) [**C-2-CO**]<sup>+</sup>, 556.7 (8) [**VI-CO**]<sup>+</sup>, 545.7 (18) [**C-3-CO**]<sup>+</sup>, 528.7 (10) [**VI-2-CO**]<sup>+</sup>, 517.7 (6) [**C-4-CO**]<sup>+</sup>, 500.7 (7) [**VI-3-CO**]<sup>+</sup>, 472.7 (4) [**VI-4-CO**]<sup>+</sup>. Negative ion ESI-MS  $m/z$  (%): 1162.64 (100) [ $\text{TEF}^{\text{Cl}}$ ]<sup>-</sup>. IR (ATR)  $\tilde{\nu}/\text{cm}^{-1} = 3145$  (vw), 3138 (vw), 3122 (vw), 2360 (w), 2344 (w), 2053 (w), 2032 (w), 1998 (m), 1983 (m), 1970 (w), 1954 (w), 1943 (w), 1310 (w), 1243 (m), 1194 (vs), 1145 (w), 1010 (w), 964 (w), 858 (m), 787 (m), 725 (m), 712 (s).

### 2.3.2 Preparation of $[(\text{CpMo}(\text{CO})_2)_2(\mu_4, \eta^2:\eta^2:\eta^2\text{-AsBiBiAs})][\text{TEF}^{\text{Cl}}]_2$ (**4b**)

A dark purple solution of [Thia][TEF<sup>Cl</sup>] (58 mg, 0.042 mmol, 1.0 eq.) in 3 mL  $\text{CH}_2\text{Cl}_2$  was transferred to a dark red solution of  $[(\text{CpMo}(\text{CO})_2)_2(\mu, \eta^2:\eta^2\text{-AsBi})]$  (**D**) (30 mg, 0.042 mmol, 1.0 eq.) in 5 mL  $\text{CH}_2\text{Cl}_2$  at -50 °C causing an immediate colour change to a dark greenish brown solution. After stirring for 60 minutes, addition of 40 mL *n*-hexane led to precipitation of a dark green to black powder. The slightly brown supernatant solution was removed and washed twice with pure toluene. The crude product was dried in vacuum and recrystallization via layering a  $\text{CH}_2\text{Cl}_2$  solution with *n*-hexane (1:4) and storage at +4 °C afforded pure **4b** as dark red blocks, which were suitable for single crystal X-ray diffraction. The supernatant was removed and the crystals were dried in vacuum. Yield 64 mg (0.017 mmol = 81 %). Compound **4b** is silent in the X-band EPR spectra in  $\text{CH}_2\text{Cl}_2$  solution at room temperature and at 77 K. Anal. calcd. for  $[(\text{C}_{14}\text{H}_{10}\text{O}_4\text{Mo}_2\text{AsBi})_2][\text{TEF}^{\text{Cl}}]_2$ : C: 19.14; H: 0.54. Found: C: 19.30; H: 0.40. Mass spectrometric investigations were unsuccessful due to decomposition of **4b** during the measurement.

### 3 Cyclovoltammetry

#### 3.1.1 CV of A

The CV of **A** in CH<sub>2</sub>Cl<sub>2</sub> solution is depicted in Figure S1. The complex undergoes a pseudo-reversible oxidation with the peak of the anodic wave at +0.19 V vs. Cp<sub>2</sub>Fe<sup>0/+</sup>, while the corresponding cathodic wave is significantly shifted to -0.31 V vs. Cp<sub>2</sub>Fe<sup>0/+</sup>. This suggests that after the first oxidation of **A**, the shifted peak for the reduction corresponds to the dication of [A-A]<sup>2+</sup>. During this study, no decline of the cathodic wave of [A-A]<sup>2+</sup> or the observation of any reduction assignable to the monocation [A]<sup>+</sup> could be observed in the CV regardless of the scan rates, the temperature and the concentration of **A**. This points to a rapid dimerization to the dication. The full CV of **A** (Figure S2) reveals also a second (+0.45 V vs. Cp<sub>2</sub>Fe<sup>0/+</sup>) and a third oxidation (+0.71 V vs. Cp<sub>2</sub>Fe<sup>0/+</sup>), which are irreversible.

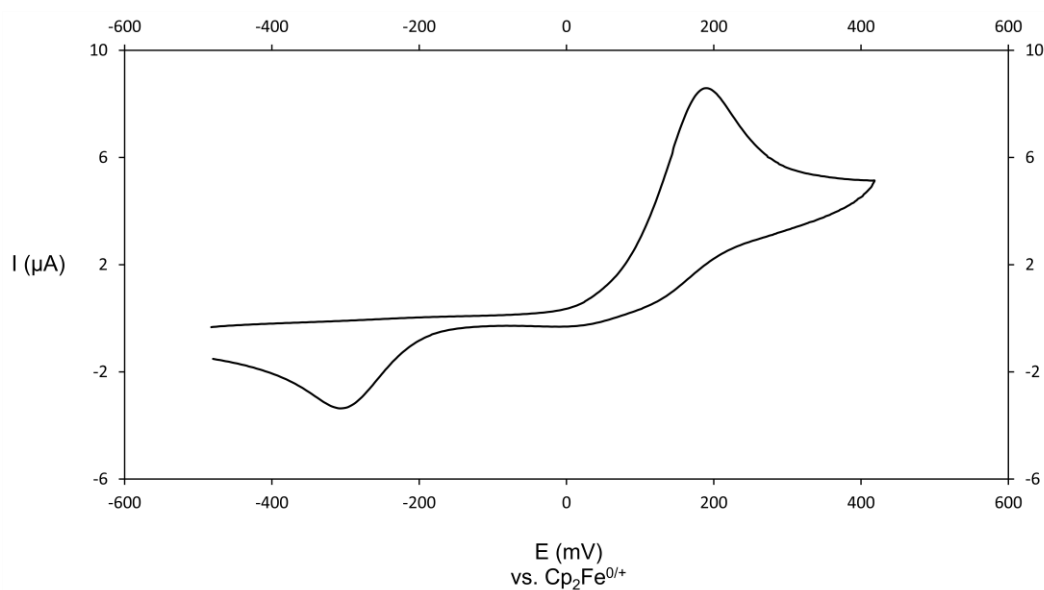

**Figure S1.** CV of **A** showing only the first (pseudo-reversible) oxidation.

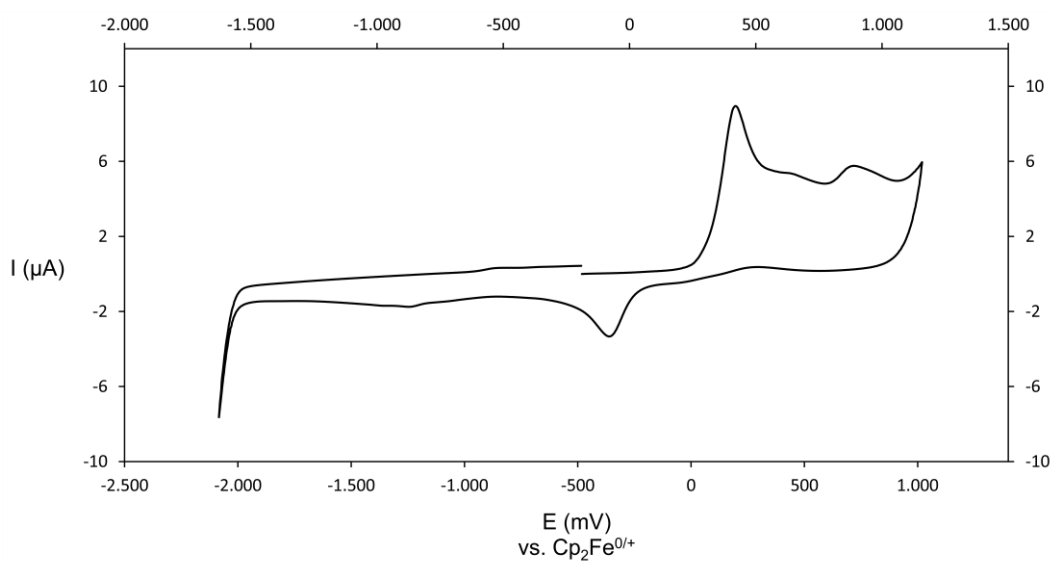

**Figure S2.** Full CV of **A**.



### 3.1.2 CV of B

The CV of **B** in  $\text{CH}_2\text{Cl}_2$  solution is depicted in Figure S3. The complex undergoes a pseudo-reversible oxidation with the peak of the anodic wave at  $+0.08\text{ V}$  vs.  $\text{Cp}_2\text{Fe}^{0/+}$ , while the corresponding cathodic wave is significantly shifted to  $-0.43\text{ V}$  vs.  $\text{Cp}_2\text{Fe}^{0/+}$ . This suggests that after the first oxidation of **B**, the shifted peak for the reduction corresponds to the dication of  $[\mathbf{B}-\mathbf{B}]^{2+}$ . During this study, no decline of the cathodic wave of  $[\mathbf{B}-\mathbf{B}]^{2+}$  or the observation of any reduction assignable to the monocation  $[\mathbf{B}]^+$  could be observed in the CV regardless of the scan rates, the temperature and the concentration of **B**. This points to a rapid dimerization to the dication. The full CV of **B** (Figure S4) reveals also a second oxidation ( $+0.56\text{ V}$  vs.  $\text{Cp}_2\text{Fe}^{0/+}$ ) and a reduction ( $-2.16\text{ V}$  vs.  $\text{Cp}_2\text{Fe}^{0/+}$ ), which are irreversible.

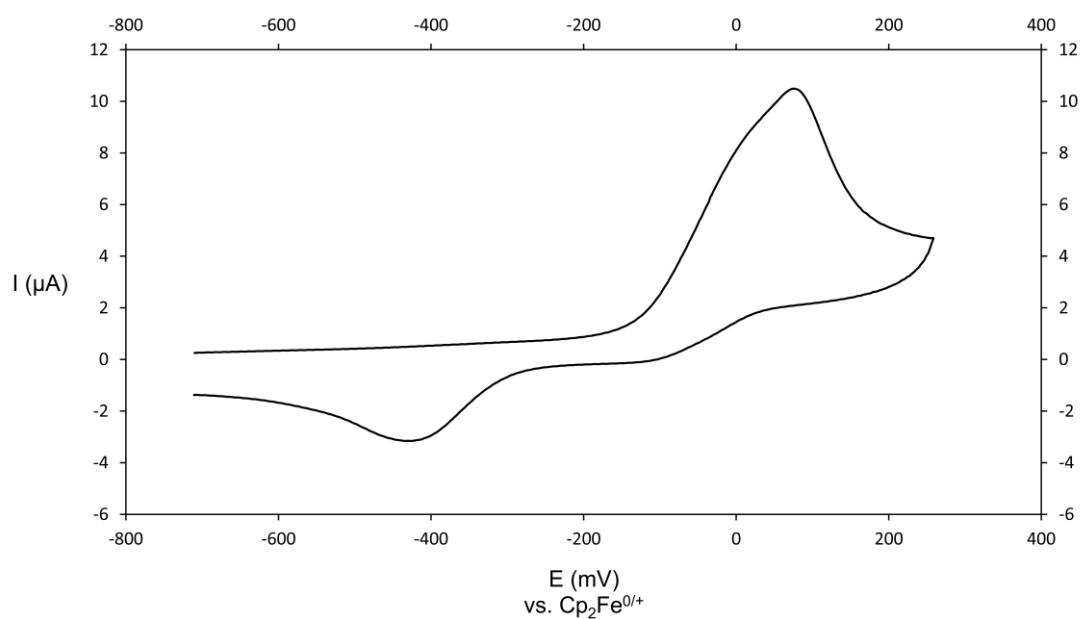

Figure S3. CV of **B** showing only the first (pseudo-reversible) oxidation.

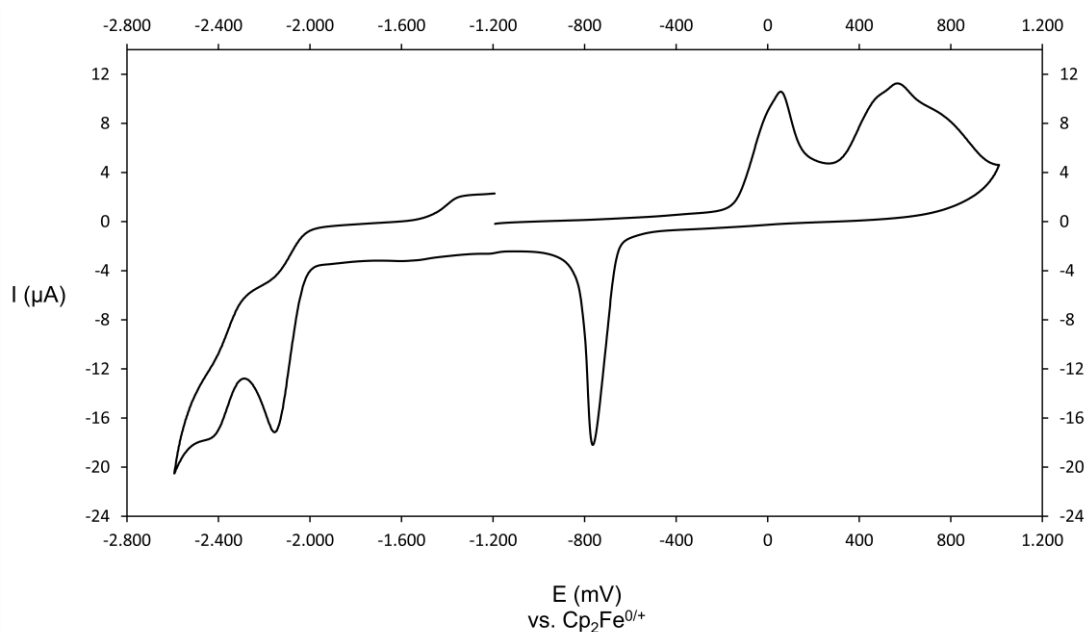

Figure S4. Full CV of **B**.

### 3.1.3 CV of C

The CV of **C** in  $\text{CH}_2\text{Cl}_2$  solution is depicted in Figure S5. The complex undergoes a pseudo-reversible oxidation with the peak of the anodic wave at +0.12 V vs.  $\text{Cp}_2\text{Fe}^{0/+}$ , while the corresponding cathodic wave is significantly shifted to  $-0.20$  V vs.  $\text{Cp}_2\text{Fe}^{0/+}$ . This suggests that after the first oxidation of **C**, the shifted peak for the reduction corresponds to the dication of  $[\text{C-C}]^{2+}$ . During this study, no decline of the cathodic wave of  $[\text{C-C}]^{2+}$  or the observation of any reduction assignable to the monocation  $[\text{C}]^+$  could be observed in the CV regardless of the scan rates, the temperature and the concentration of **C**. This points to a rapid dimerization to the dication. The full CV of **C** (Figure S6) reveals also a second (+0.55 V vs.  $\text{Cp}_2\text{Fe}^{0/+}$ ) and a third oxidation (+1.26 V vs.  $\text{Cp}_2\text{Fe}^{0/+}$ ) as well as a reduction ( $-2.17$  V vs.  $\text{Cp}_2\text{Fe}^{0/+}$ ), which are irreversible.

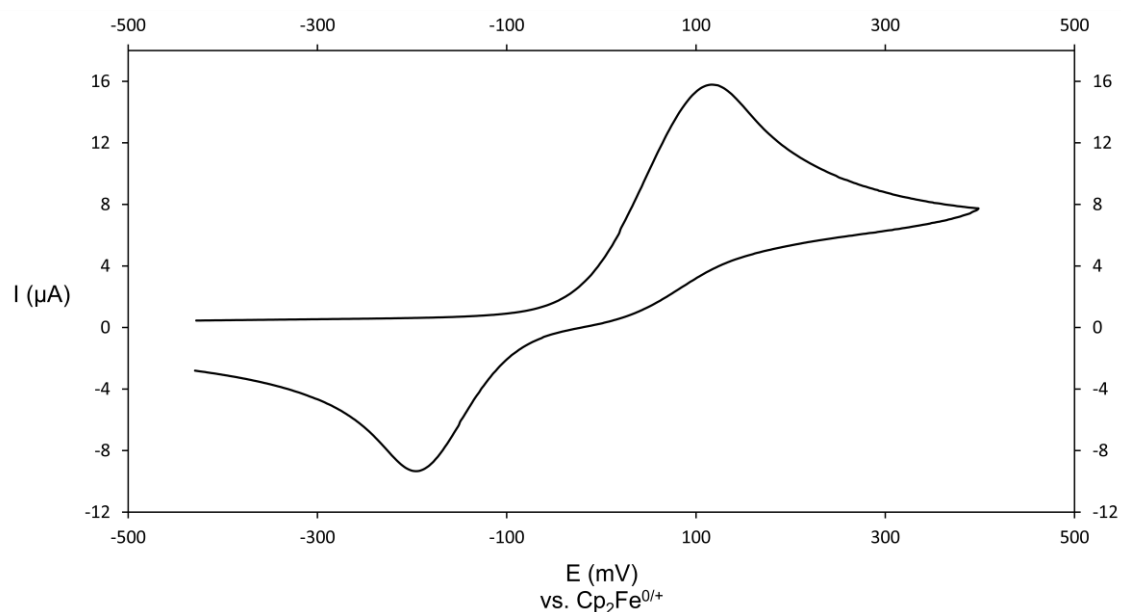

Figure S5. CV of **C** showing only the first (pseudo-reversible) oxidation.

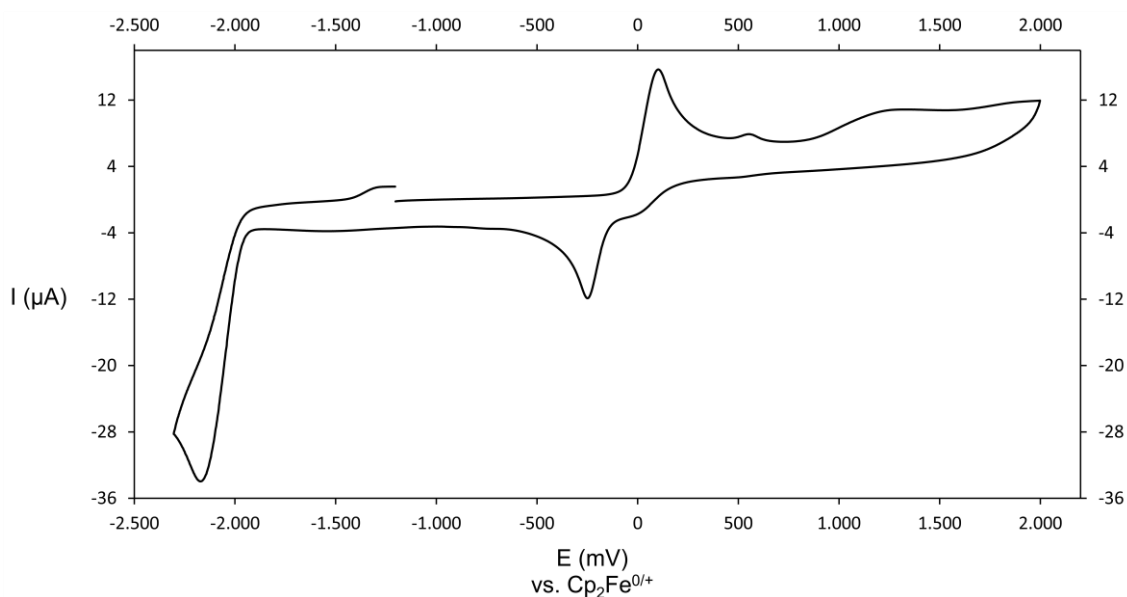

Figure S6. Full CV of **C**.

### 3.1.4 CV of D

The CV of **D** in  $\text{CH}_2\text{Cl}_2$  solution is depicted in Figure S7. The complex undergoes a pseudo-reversible oxidation with the peak of the anodic wave at  $-0.10$  V vs.  $\text{Cp}_2\text{Fe}^{0/+}$ , while the corresponding cathodic wave is significantly shifted to  $-0.36$  V vs.  $\text{Cp}_2\text{Fe}^{0/+}$ . This suggests that after the first oxidation of **D**, the shifted peak for the reduction corresponds to the dication of  $[\mathbf{D-D}]^{2+}$ . During this study, no decline of the cathodic wave of  $[\mathbf{D-D}]^{2+}$  or the observation of any reduction assignable to the monocation  $[\mathbf{D}]^+$  could be observed in the CV regardless of the scan rates, the temperature and the concentration of **D**. This points to a rapid dimerization to the dication. The full CV of **D** (Figure S8) reveals also a second ( $+0.19$  V vs.  $\text{Cp}_2\text{Fe}^{0/+}$ ) and a third oxidation ( $+0.88$  V vs.  $\text{Cp}_2\text{Fe}^{0/+}$ ) as well as a reduction ( $-2.26$  V vs.  $\text{Cp}_2\text{Fe}^{0/+}$ ), which are irreversible.

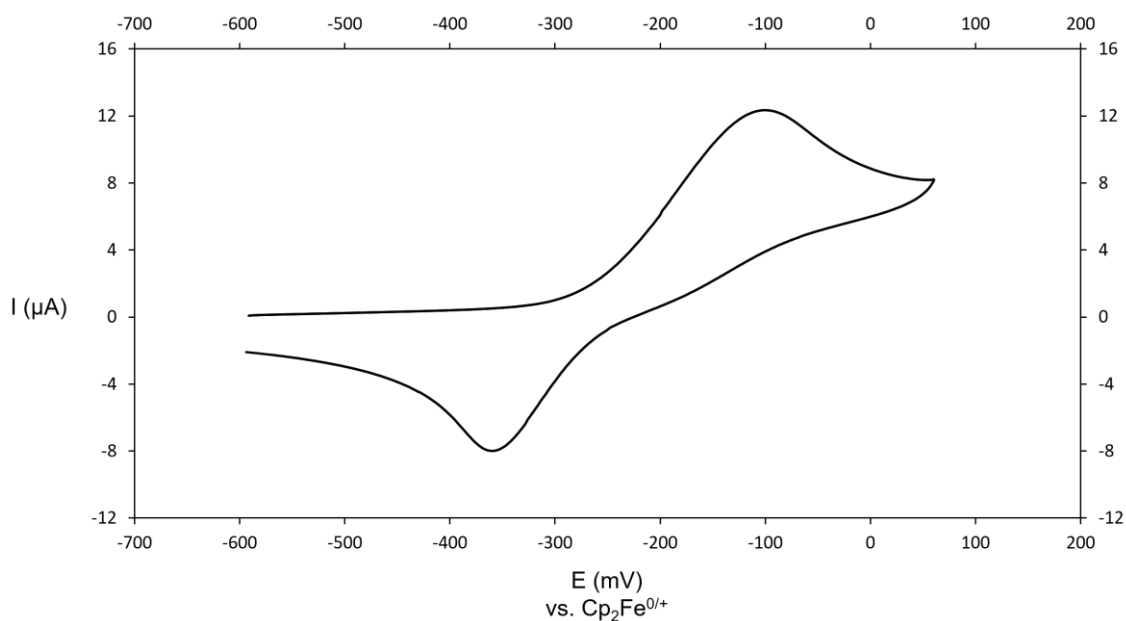

Figure S7. CV of **D** showing only the first (pseudo-reversible) oxidation.

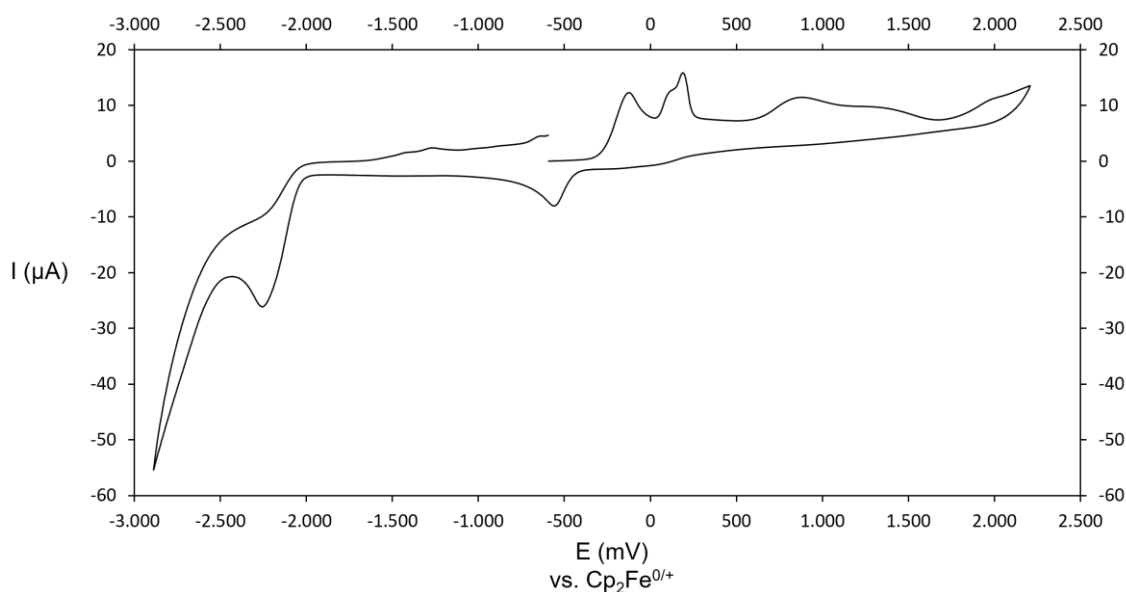

Figure S8. Full CV of **D**.

### 3.1.5 CV of E

The CV of **E** in  $\text{CH}_2\text{Cl}_2$  solution is depicted in Figure S9. The complex undergoes a pseudo-reversible oxidation with the peak of the anodic wave at  $-0.07$  V vs.  $\text{Cp}_2\text{Fe}^{0/+}$ , while the corresponding cathodic wave is significantly shifted to  $-0.44$  V vs.  $\text{Cp}_2\text{Fe}^{0/+}$ . This suggests that after the first oxidation of **E**, the shifted peak for the reduction corresponds to the dication of  $[\text{E}-\text{E}]^{2+}$ . During this study, no decline of the cathodic wave of  $[\text{E}-\text{E}]^{2+}$  or the observation of any reduction assignable to the monocation  $[\text{E}]^+$  could be observed in the CV regardless of the scan rates, the temperature and the concentration of **E**. This points to a rapid dimerization to the dication. Besides the oxidation, also a small shoulder at  $(+0.05$  V vs.  $\text{Cp}_2\text{Fe}^{0/+})$ , which can be attributed to small trace impurities of **VI**, which are formed during its synthesis.<sup>2</sup> The full CV of **E** (Figure S10) reveals also a second  $(+0.48$  V vs.  $\text{Cp}_2\text{Fe}^{0/+})$  and a third oxidation  $(+0.89$  V vs.  $\text{Cp}_2\text{Fe}^{0/+})$  as well as a reduction  $(-2.11$  V vs.  $\text{Cp}_2\text{Fe}^{0/+})$ , which are irreversible.

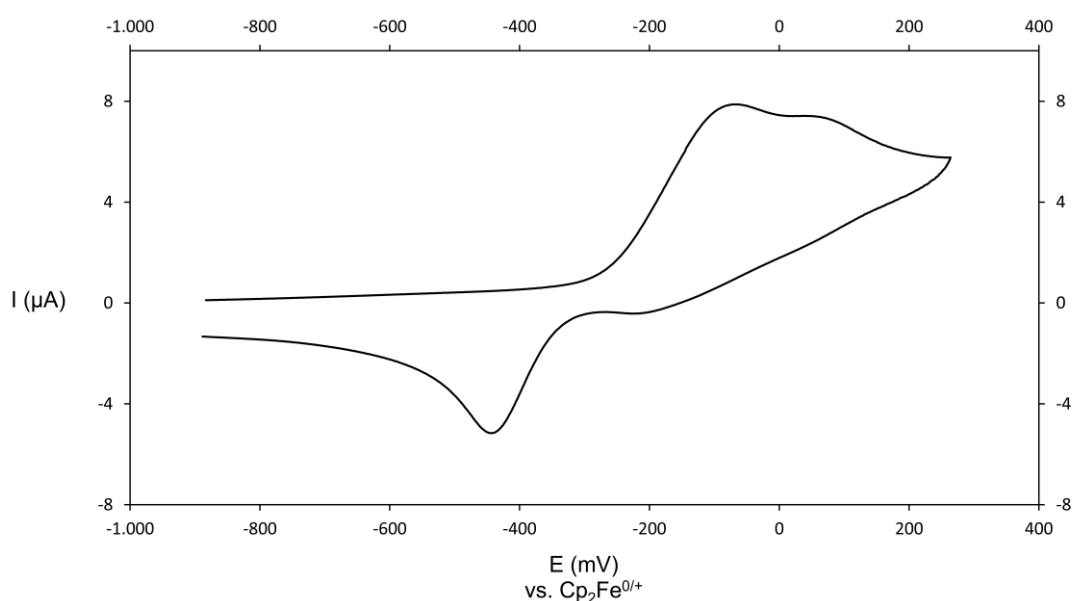

**Figure S9.** CV of **E** showing only the first (pseudo-reversible) oxidation.

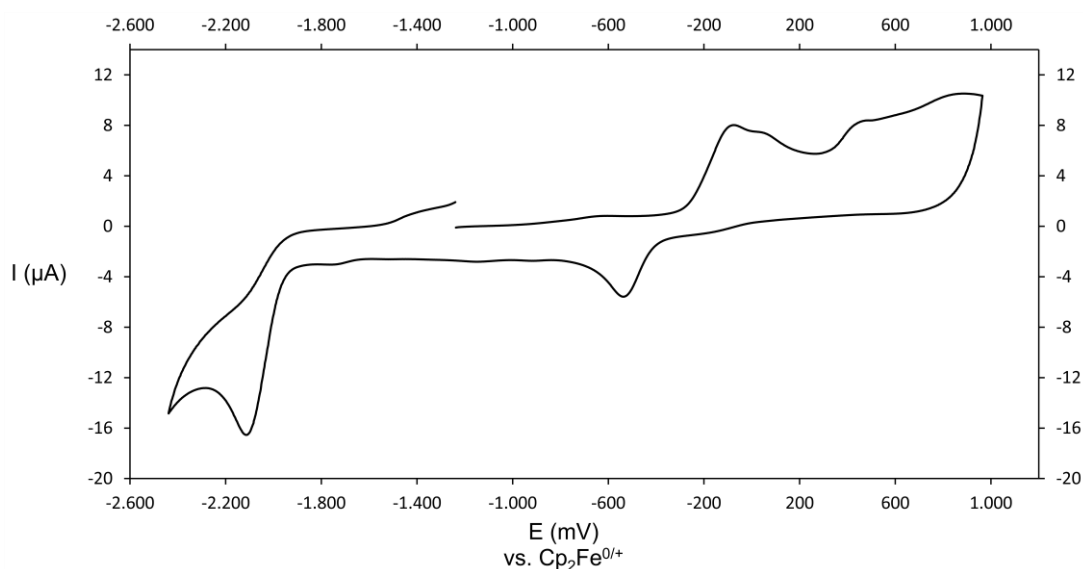

**Figure S10.** Full CV of **E**.

## 4 NMR spectra

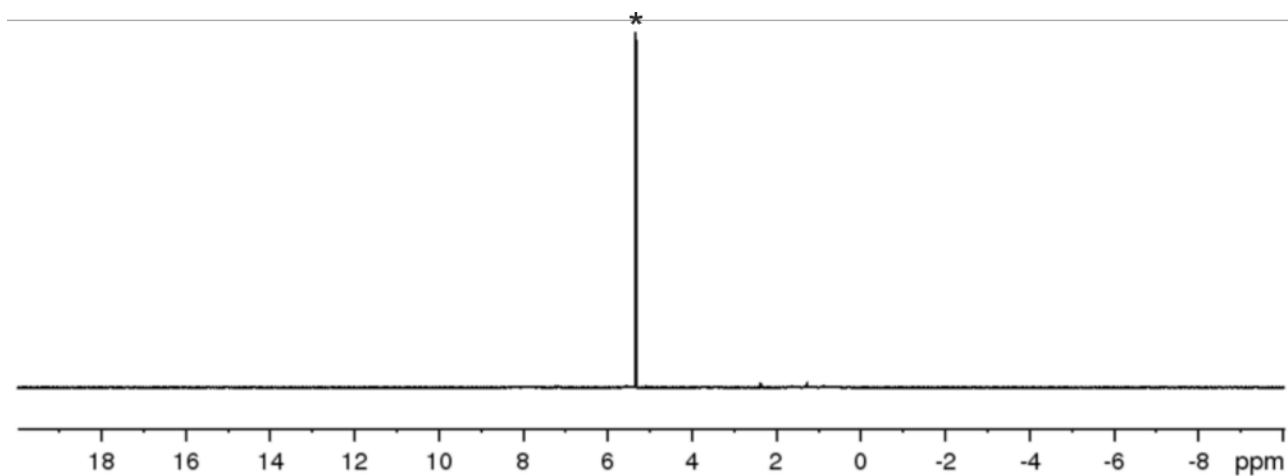

Figure S11:  $^1\text{H}$  NMR spectrum of  $[\text{Thia}][\text{TEF}^{\text{Cl}}]$  in  $\text{CD}_2\text{Cl}_2$ ; \* =  $\text{CD}_2\text{Cl}_2$ .

The  $^1\text{H}$  NMR spectrum of  $[\text{Thia}][\text{TEF}^{\text{Cl}}]$  reveals no signals for  $[\text{Thia}]^+$  affirming the paramagnetic character of the radical cation.

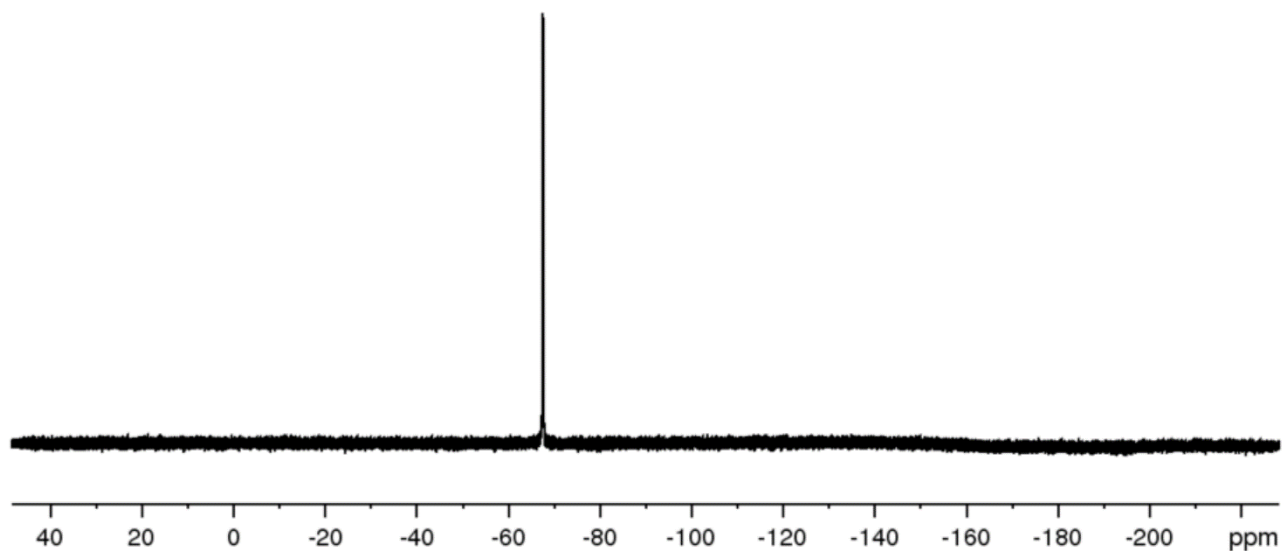

Figure S12:  $^{19}\text{F}\{^1\text{H}\}$  NMR spectrum of  $[\text{Thia}][\text{TEF}^{\text{Cl}}]$  in  $\text{CD}_2\text{Cl}_2$ .

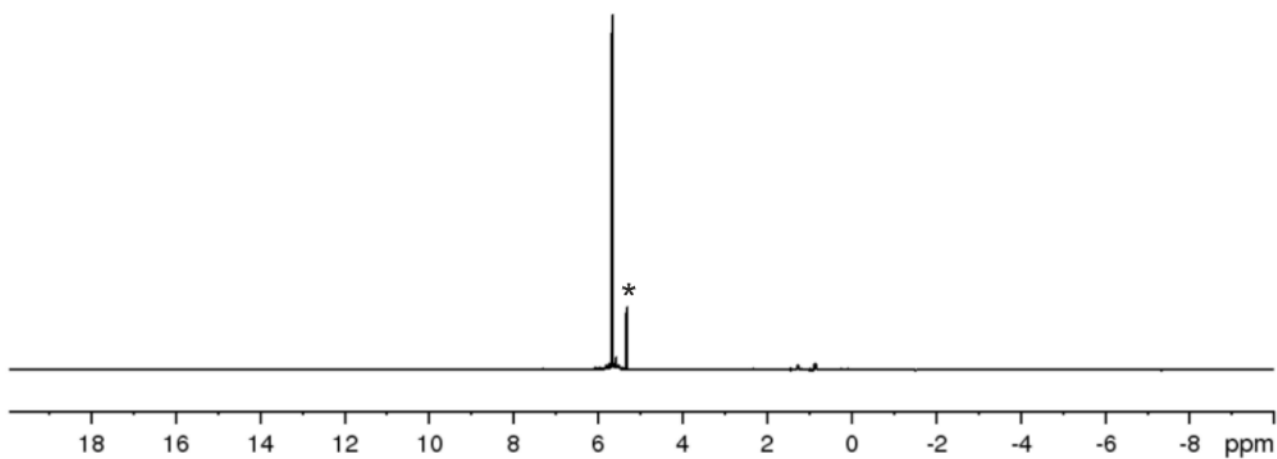

Figure S13: <sup>1</sup>H NMR spectrum of  $[(\text{CpMo}(\text{CO})_2)_4(\mu_4, \eta^2: \eta^2: \eta^2: \eta^2\text{-AsPPAs})][\text{TEF}]_2$  (**1**) in  $\text{CD}_2\text{Cl}_2$ ; \* =  $\text{CD}_2\text{Cl}_2$ .

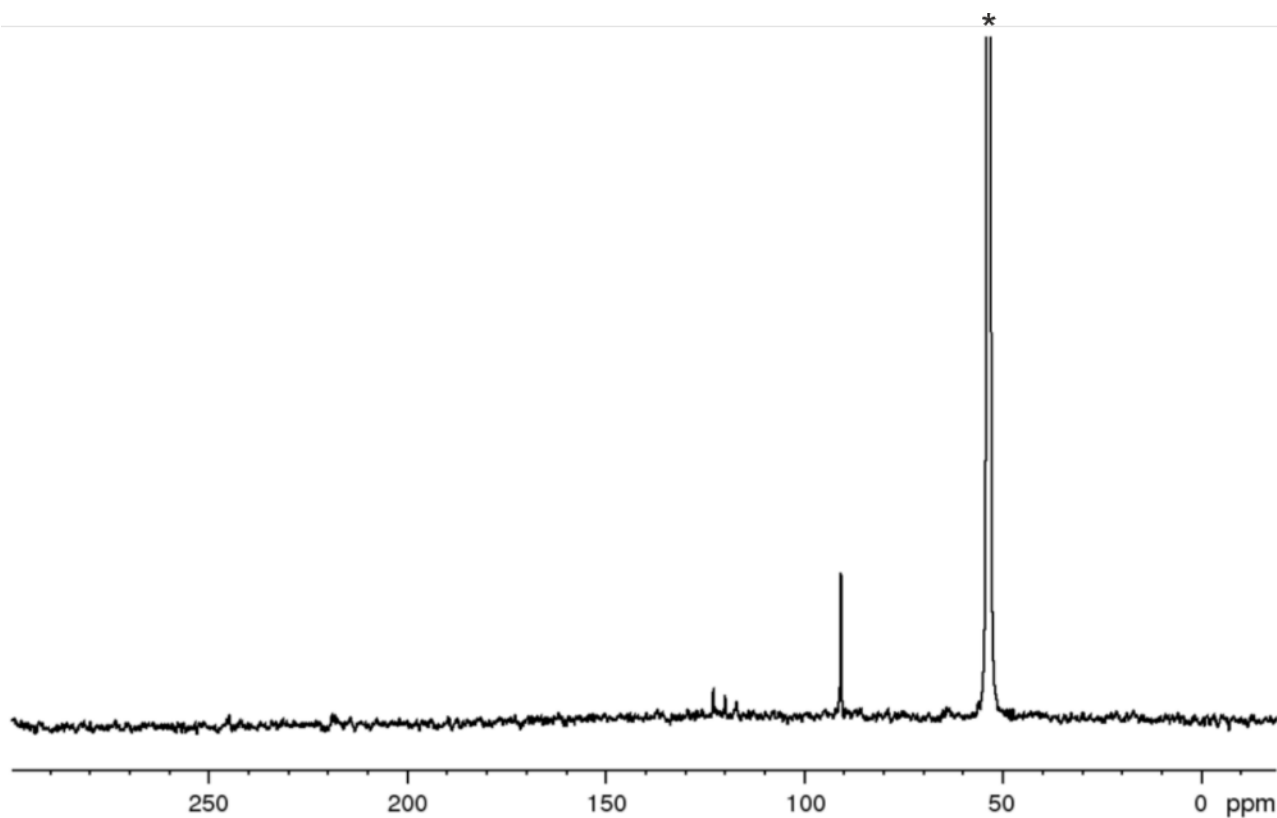

Figure S14: <sup>13</sup>C{<sup>1</sup>H} NMR spectrum of  $[(\text{CpMo}(\text{CO})_2)_4(\mu_4, \eta^2: \eta^2: \eta^2: \eta^2\text{-AsPPAs})][\text{TEF}]_2$  (**1**) in  $\text{CD}_2\text{Cl}_2$ ; \* =  $\text{CD}_2\text{Cl}_2$ .

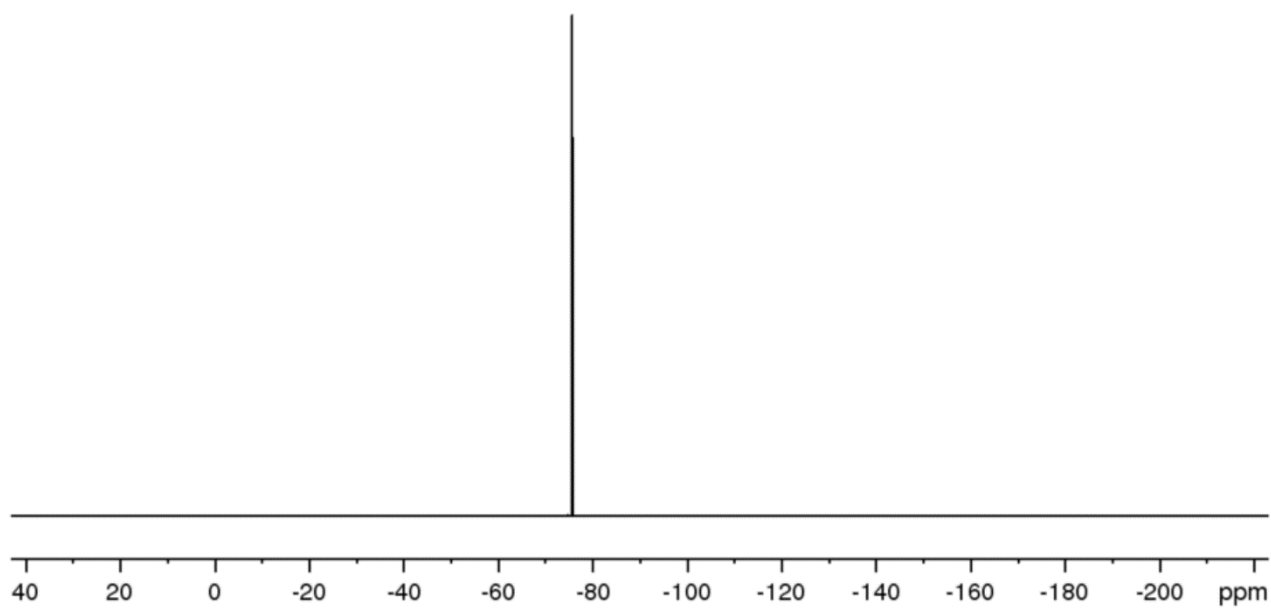

Figure S15:  $^{19}\text{F}\{^1\text{H}\}$  NMR spectrum of  $[\{\text{CpMo}(\text{CO})_2\}_4(\mu_4, \eta^2:\eta^2:\eta^2:\eta^2\text{-AsPPAs})][\text{TEF}]_2$  (**1**) in  $\text{CD}_2\text{Cl}_2$ .

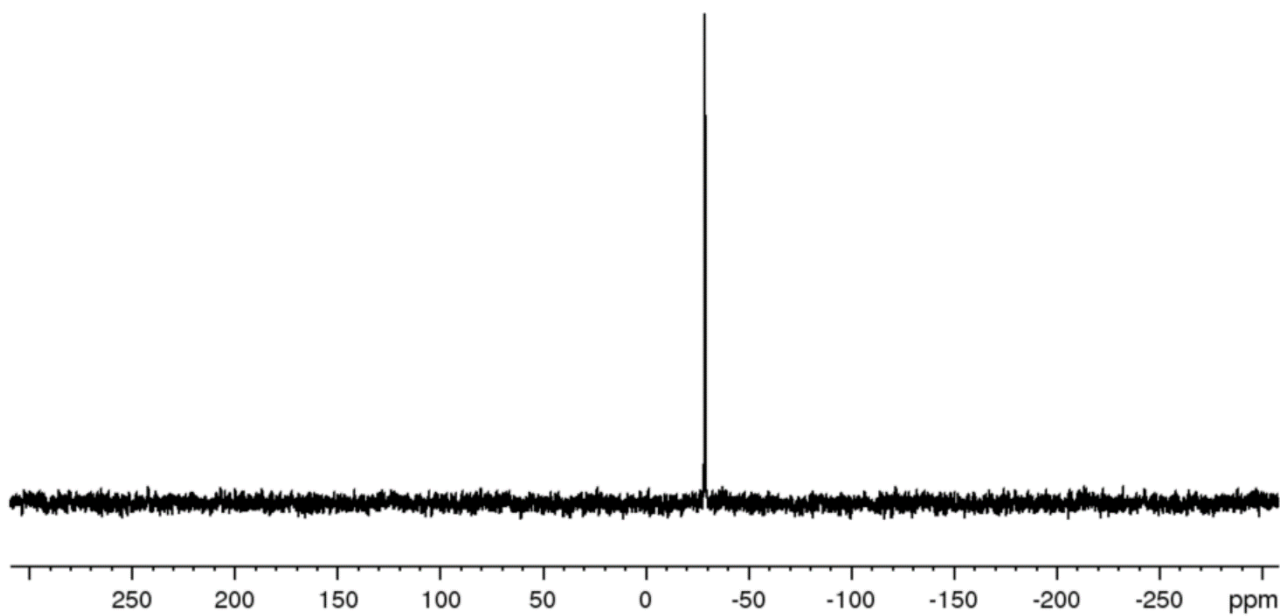

Figure S16:  $^{31}\text{P}\{^1\text{H}\}$  NMR spectrum of  $[\{\text{CpMo}(\text{CO})_2\}_4(\mu_4, \eta^2:\eta^2:\eta^2:\eta^2\text{-AsPPAs})][\text{TEF}]_2$  (**1**) in  $\text{CD}_2\text{Cl}_2$ .

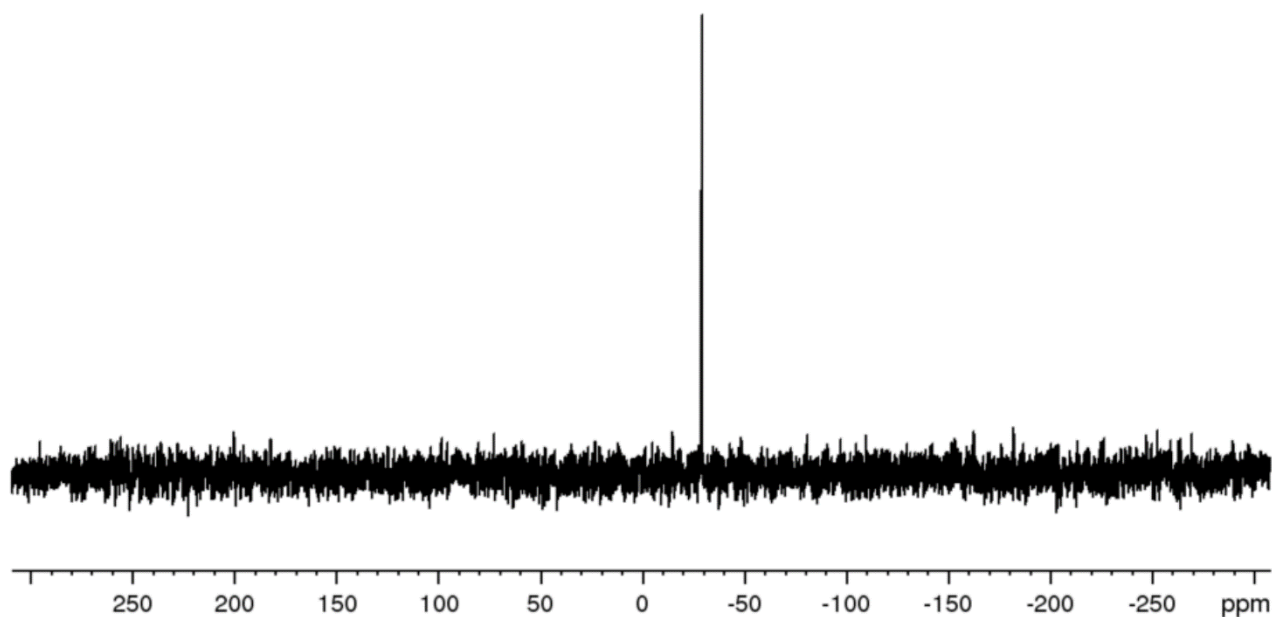

Figure S17:  $^{31}\text{P}$  NMR spectrum of  $[\{\text{CpMo}(\text{CO})_2\}_4(\mu_4, \eta^2: \eta^2: \eta^2: \eta^2\text{-AsPPAs})][\text{TEF}]_2$  (**1**) in  $\text{CD}_2\text{Cl}_2$ .

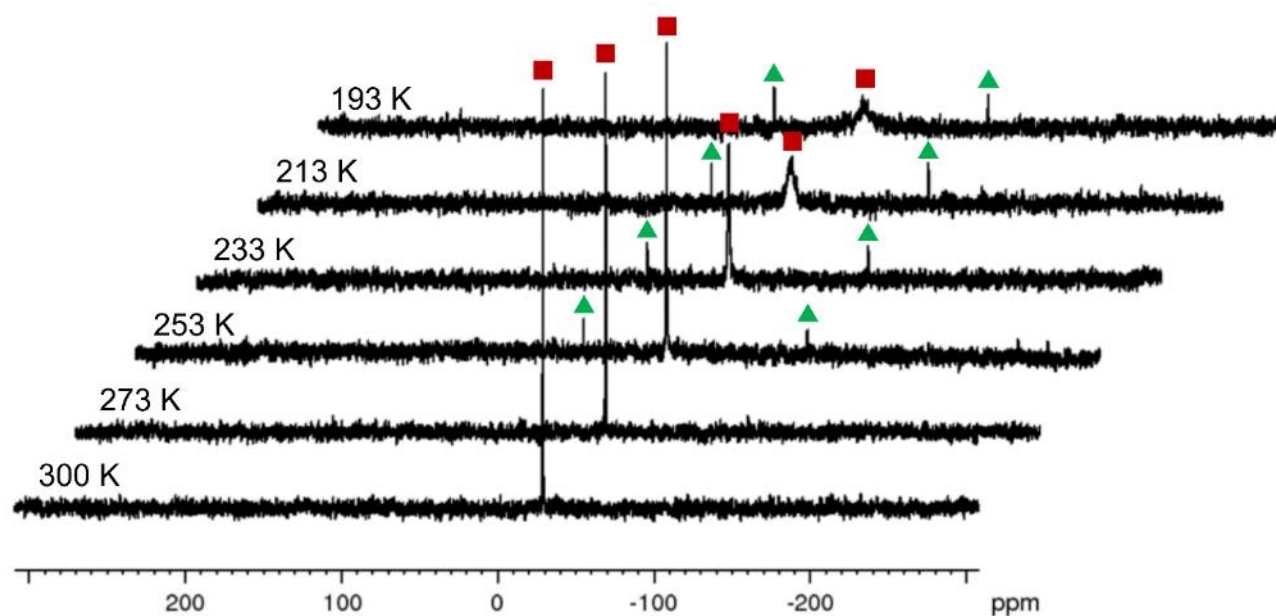

Figure S18:  $^{31}\text{P}\{^1\text{H}\}$  VT-NMR spectrum of  $[\{\text{CpMo}(\text{CO})_2\}_4(\mu_4, \eta^2: \eta^2: \eta^2: \eta^2\text{-AsPPAs})][\text{TEF}]_2$  (**1**) in  $\text{CD}_2\text{Cl}_2$ .

In Figure S18 the  $^{31}\text{P}\{^1\text{H}\}$  variable temperature (VT) NMR spectrum of **1** from 300 K to 193 K is shown. At room temperature a relatively sharp singlet at  $\delta = -28.8$  ppm ( $\omega_{1/2} = 11$  Hz) is observed, which is shifted to lower frequencies by 60 ppm compared to the starting material **A** ( $\delta = 30.1$  ppm).<sup>3</sup> Upon cooling to 193 K, the signal (■) moves farther to lower frequencies ( $\delta = -39.4$  ppm) and undergoes broadening ( $\omega_{1/2} \sim 1700$  Hz). Additionally, two new signals (▲) at  $\delta = -119.7$  ppm and 21.4 ppm arise below 253 K indicating the formation of a new, unidentified species.



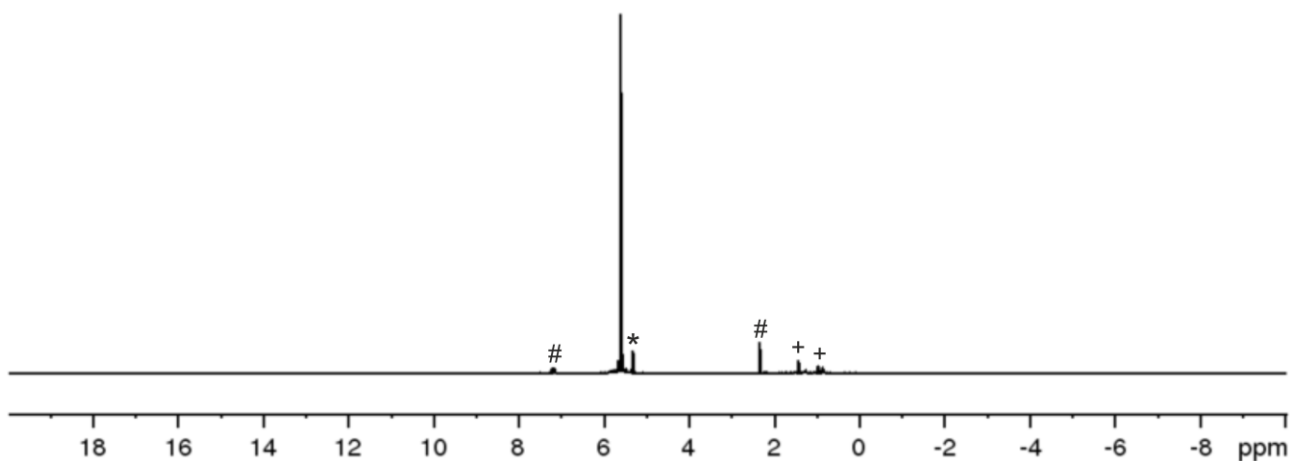

Figure S19:  $^1\text{H}$  NMR spectrum of  $[\{\text{CpMo}(\text{CO})_2\}_4(\mu_4, \eta^2: \eta^2: \eta^2: \eta^2\text{-SbPPSb})][\text{TEF}]_2$  (**2**) in  $\text{CD}_2\text{Cl}_2$ ; + = H grease, # = toluene, \* =  $\text{CD}_2\text{Cl}_2$ .

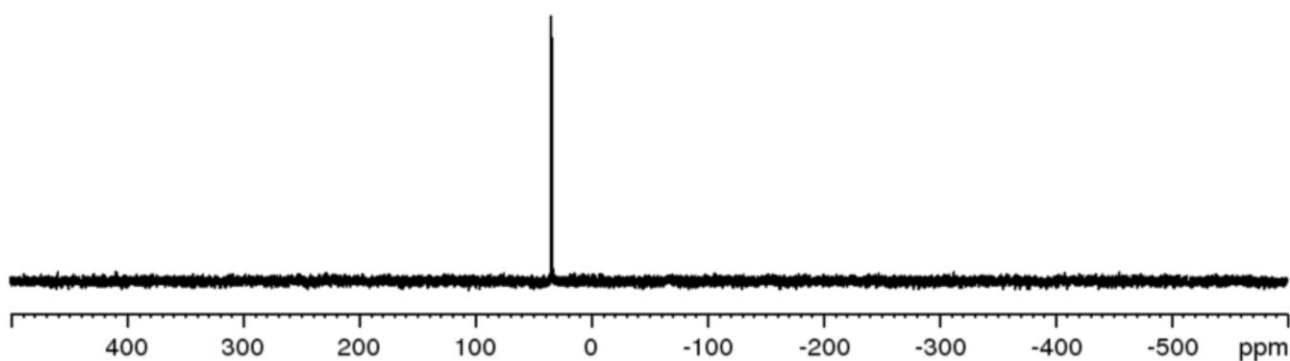

Figure S20:  $^{31}\text{P}\{^1\text{H}\}$  NMR spectrum of  $[\{\text{CpMo}(\text{CO})_2\}_4(\mu_4, \eta^2: \eta^2: \eta^2: \eta^2\text{-SbPPSb})][\text{TEF}]_2$  (**2**) in  $\text{CD}_2\text{Cl}_2$ .

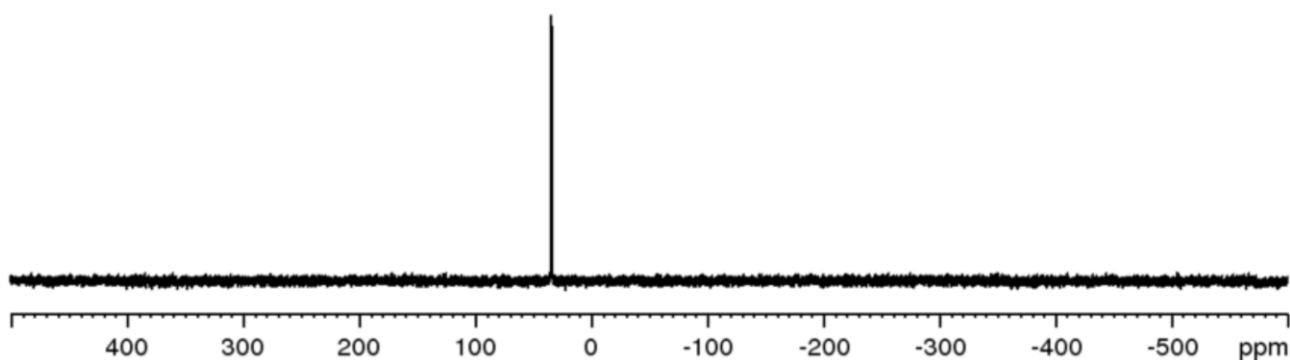

Figure S21:  $^{31}\text{P}$  NMR spectrum of  $[\{\text{CpMo}(\text{CO})_2\}_4(\mu_4, \eta^2: \eta^2: \eta^2: \eta^2\text{-SbPPSb})][\text{TEF}]_2$  (**2**) in  $\text{CD}_2\text{Cl}_2$ .

The  $^{31}\text{P}\{^1\text{H}\}$  and  $^{31}\text{P}$  NMR spectra of **2** (Figure S20 and Figure S21) reveal a sole singlet at  $\delta = 35.0$  ppm, which again is shifted to lower frequencies by 55 ppm in comparison to the starting material **B** ( $\delta = 90.7$  ppm).<sup>3</sup> This affirms the suggestion that analogue to **1** a P–P coupled dicationic product is formed.

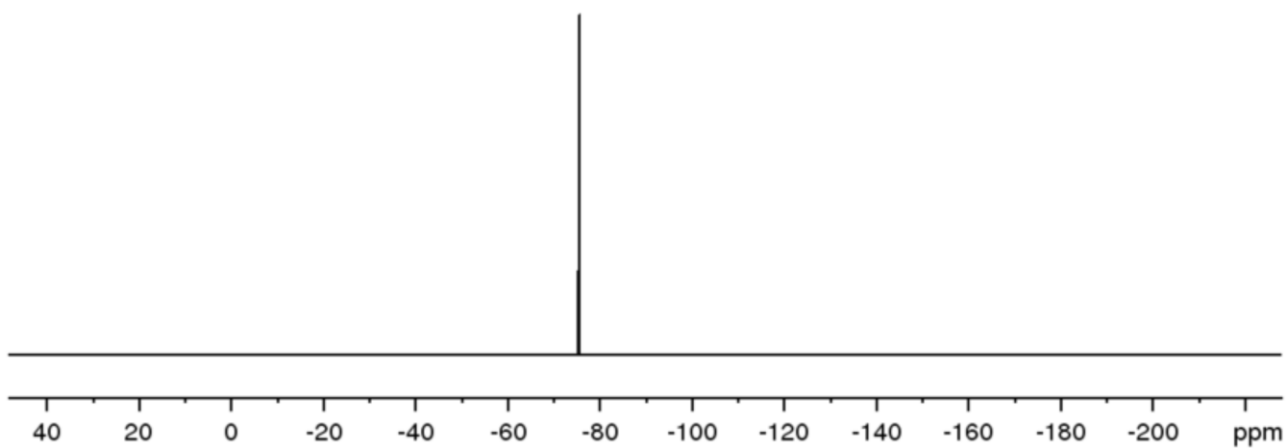

Figure S22:  $^{19}\text{F}\{^1\text{H}\}$  NMR spectrum of  $[\{\text{CpMo}(\text{CO})_2\}_4(\mu_4, \eta^2: \eta^2: \eta^2: \eta^2\text{-SbPPSb})][\text{TEF}]_2$  (**2a**) in  $\text{CD}_2\text{Cl}_2$ .

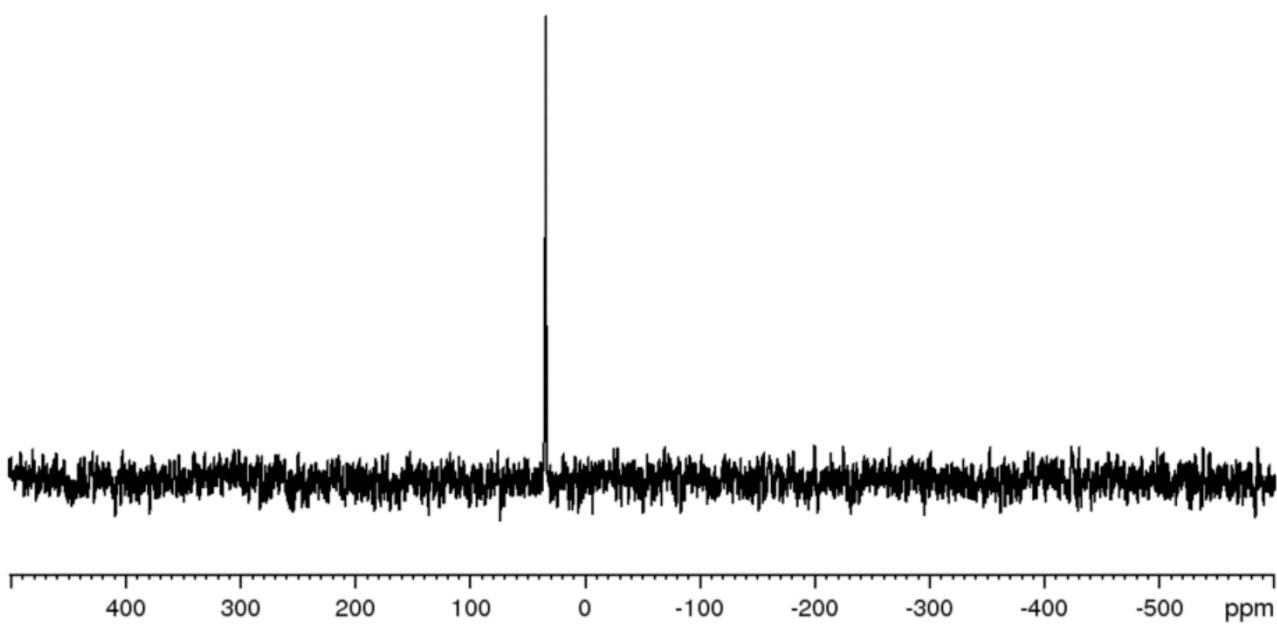

Figure S23:  $^{31}\text{P}\{^1\text{H}\}$  NMR spectrum of the crude solution of  $[\{\text{CpMo}(\text{CO})_2\}_4(\mu_4, \eta^2: \eta^2: \eta^2: \eta^2\text{-SbPPSb})][\text{TEF}]_2$  (**2**) in  $\text{CH}_2\text{Cl}_2/\text{C}_6\text{D}_6$ .

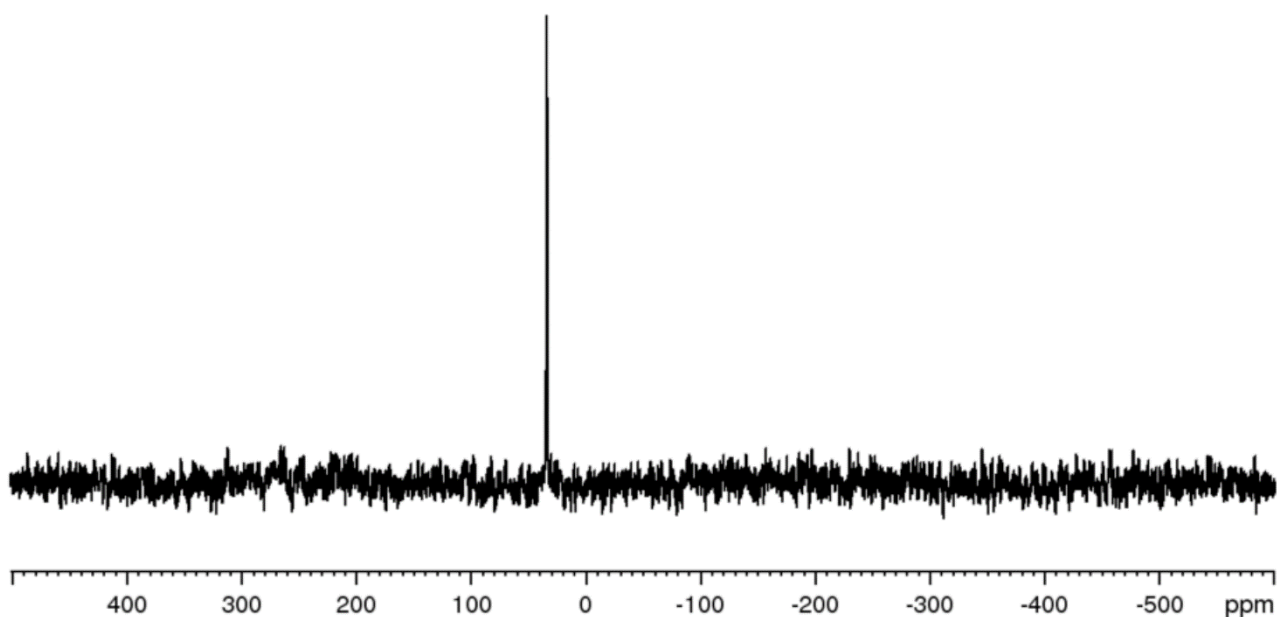

Figure S24:  $^{31}\text{P}\{^1\text{H}\}$  NMR spectrum of the crude solution of  $[(\text{CpMo}(\text{CO})_2)_4(\mu_4, \eta^2: \eta^2: \eta^2: \eta^2\text{-SbPPSb})][\text{TEF}]_2$  (**2**) in  $\text{CH}_2\text{Cl}_2/\text{C}_6\text{D}_6$ .

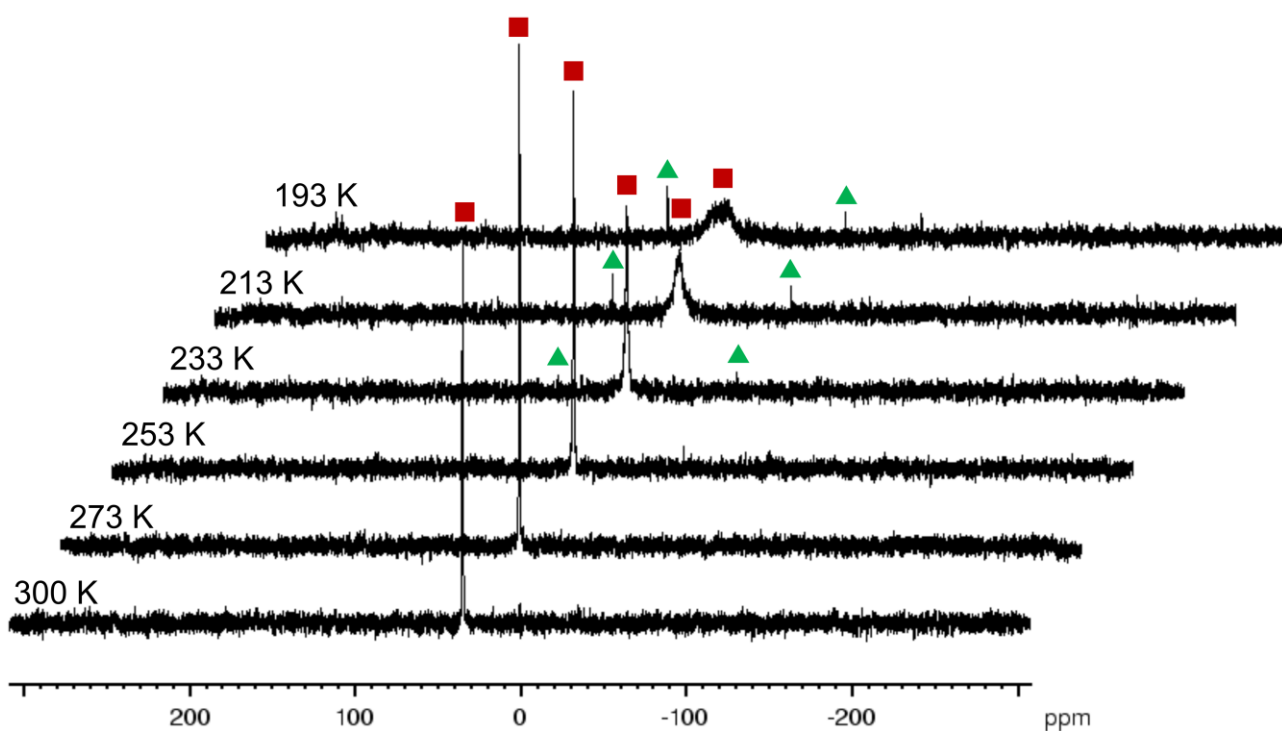

Figure S25:  $^{31}\text{P}\{^1\text{H}\}$  VT-NMR spectrum of  $[(\text{CpMo}(\text{CO})_2)_4(\mu_4, \eta^2: \eta^2: \eta^2: \eta^2\text{-SbPPSb})][\text{TEF}]_2$  (**2**) in  $\text{CD}_2\text{Cl}_2$ .

In Figure S25 the  $^{31}\text{P}\{^1\text{H}\}$  variable temperature (VT) NMR spectrum of **2** from 300 K to 193 K is shown. At room temperature a relatively sharp singlet at  $\delta = 35.0$  ppm ( $\omega_{1/2} = 72$  Hz), which is shifted to lower frequencies by 55 ppm compared to the starting material **B** ( $\delta = 90.7$  ppm).<sup>3</sup> The same behaviour was also observed for **1**. Upon cooling to 193 K, the signal (■) moves farther to lower frequencies ( $\delta = 28.4$  ppm) and undergoes broadening ( $\omega_{1/2} \sim 17000$  Hz). Additionally, two new signals (▲ at  $\delta = -40.9$  ppm and 66.5 ppm arise below 233 K indicating the formation of a new, unidentified species, like it was described for **1**.

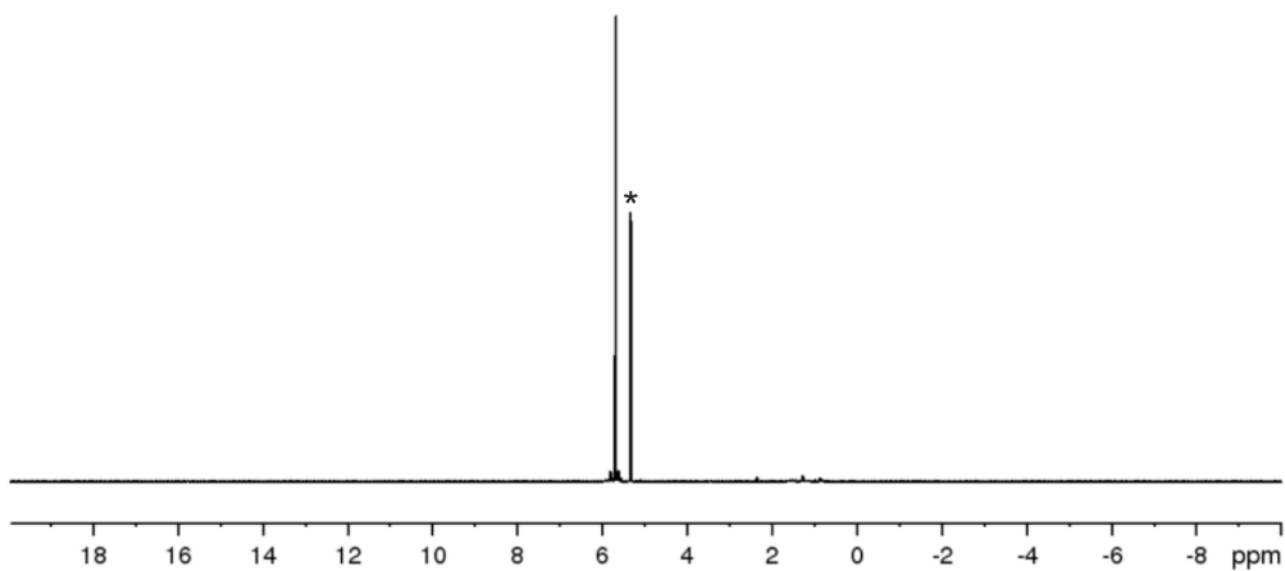

Figure S26:  $^1\text{H}$  NMR spectrum of  $[(\text{CpMo}(\text{CO})_2)_4(\mu_4, \eta^2: \eta^2: \eta^2: \eta^2\text{-AsSbSbAs})][\text{TEF}]_2$  (**3a**) in  $\text{CD}_2\text{Cl}_2$ ; \* =  $\text{CD}_2\text{Cl}_2$ .

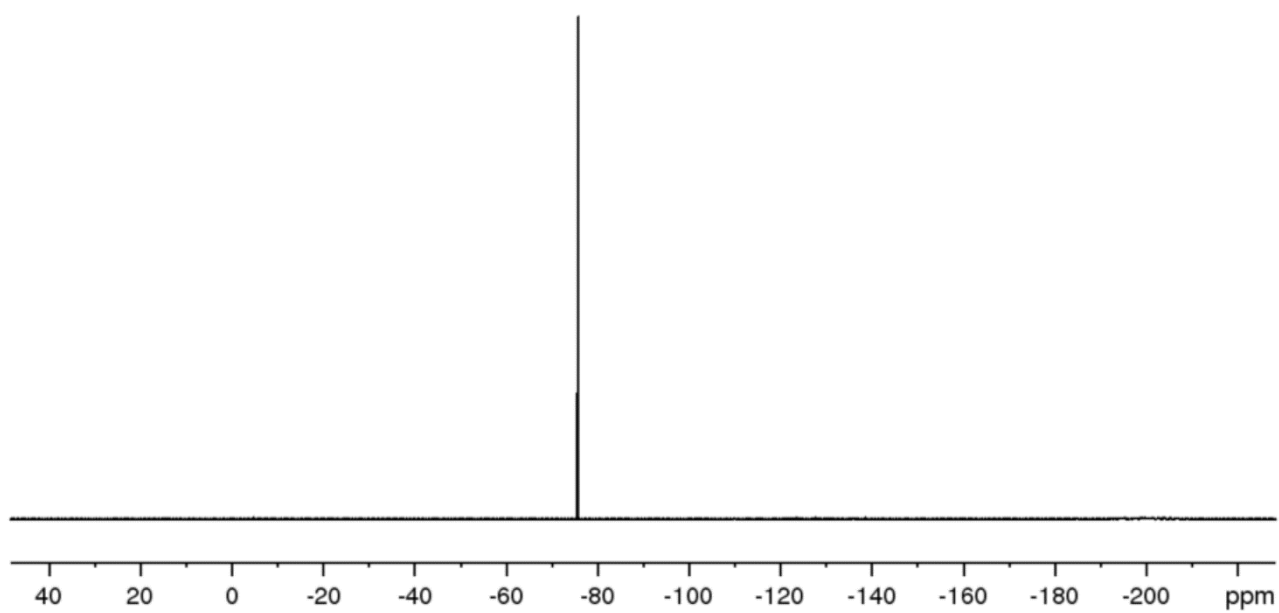

Figure S27:  $^{19}\text{F}\{^1\text{H}\}$  spectrum of  $[(\text{CpMo}(\text{CO})_2)_4(\mu_4, \eta^2: \eta^2: \eta^2: \eta^2\text{-AsSbSbAs})][\text{TEF}]_2$  (**3a**) in  $\text{CD}_2\text{Cl}_2$ .

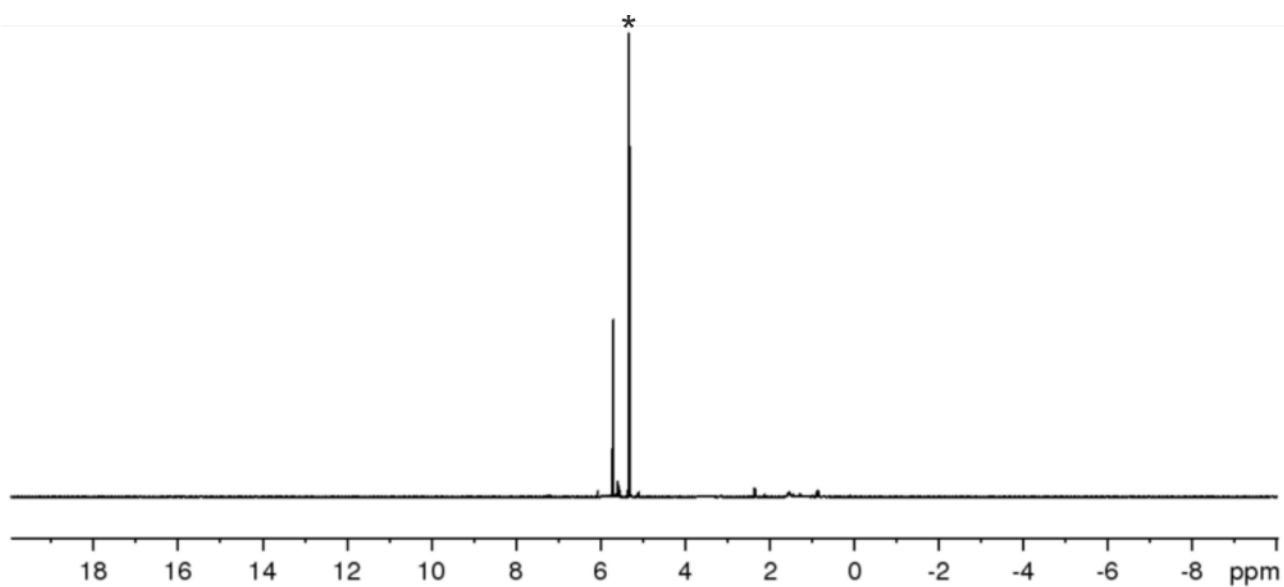

Figure S28:  $^1\text{H}$  NMR spectrum of  $[\{\text{CpMo}(\text{CO})_2\}_4(\mu_4, \eta^2: \eta^2: \eta^2: \eta^2\text{-AsSbAsSb})][\text{TEF}^{\text{Cl}}]_2$  (**3b**) in  $\text{CD}_2\text{Cl}_2$ , \* =  $\text{CD}_2\text{Cl}_2$ .

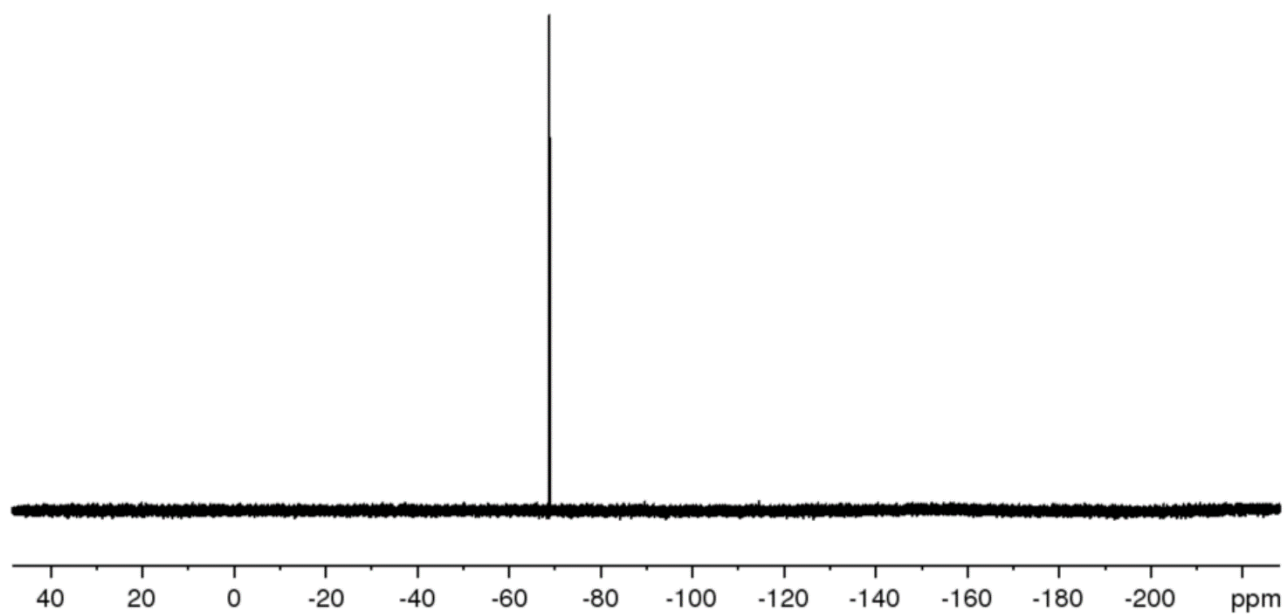

Figure S29:  $^{19}\text{F}\{^1\text{H}\}$  NMR spectrum of  $[\{\text{CpMo}(\text{CO})_2\}_4(\mu_4, \eta^2: \eta^2: \eta^2: \eta^2\text{-AsSbAsSb})][\text{TEF}^{\text{Cl}}]_2$  (**3b**) in  $\text{CD}_2\text{Cl}_2$ .

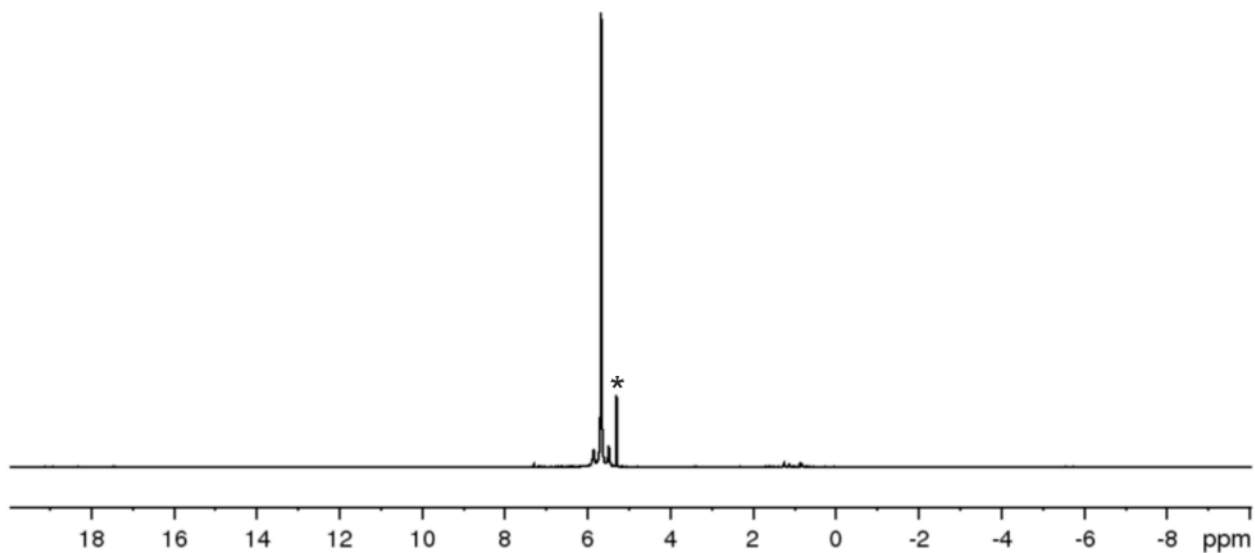

Figure S30:  $^1\text{H}$  NMR spectrum of  $[\{\text{CpMo}(\text{CO})_2\}_4(\mu_4, \eta^2: \eta^2: \eta^2: \eta^2\text{-AsBiBiAs})][\text{TEF}]_2$  (**4a**) in  $\text{CD}_2\text{Cl}_2$ ; \* =  $\text{CD}_2\text{Cl}_2$ .

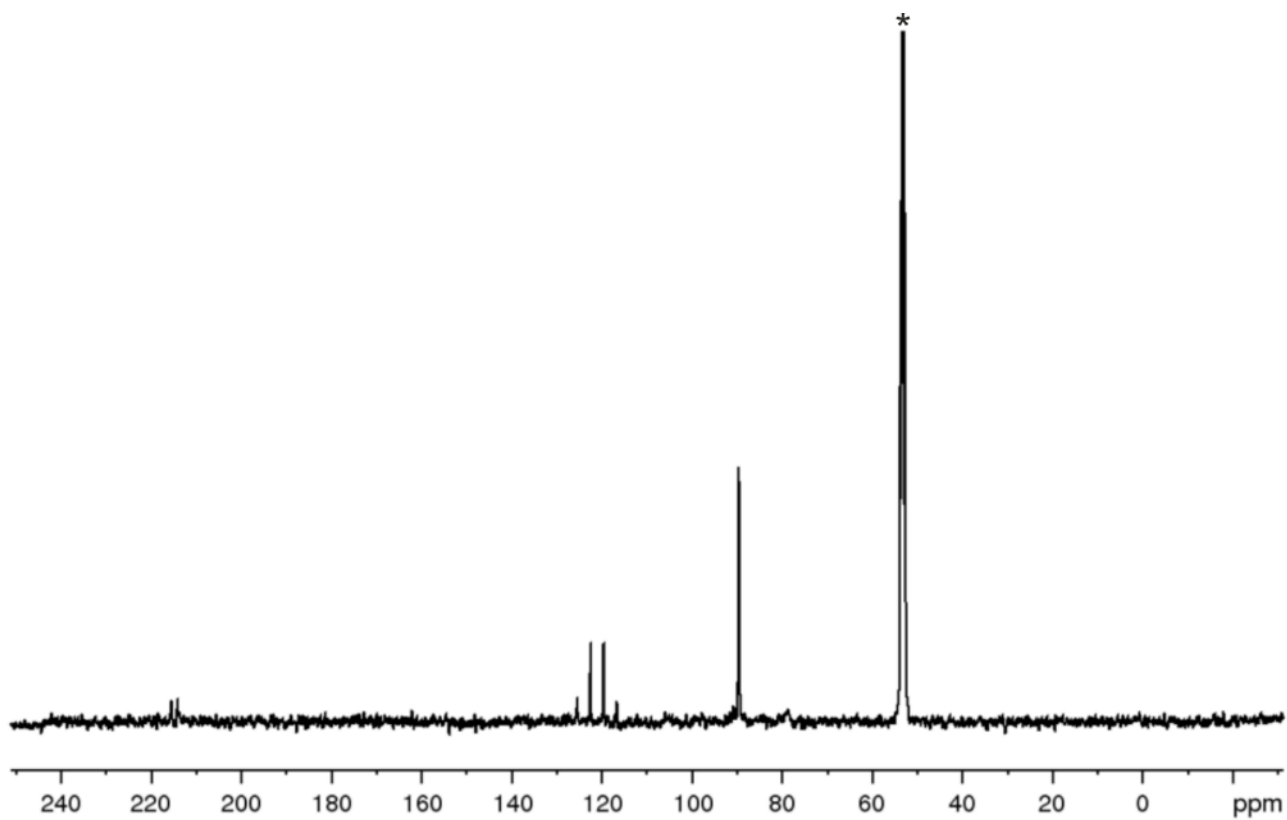

Figure S31:  $^{13}\text{C}\{^1\text{H}\}$  NMR spectrum of  $[\{\text{CpMo}(\text{CO})_2\}_4(\mu_4, \eta^2: \eta^2: \eta^2: \eta^2\text{-AsBiBiAs})][\text{TEF}]_2$  (**4a**) in  $\text{CD}_2\text{Cl}_2$ ; \* =  $\text{CD}_2\text{Cl}_2$ .

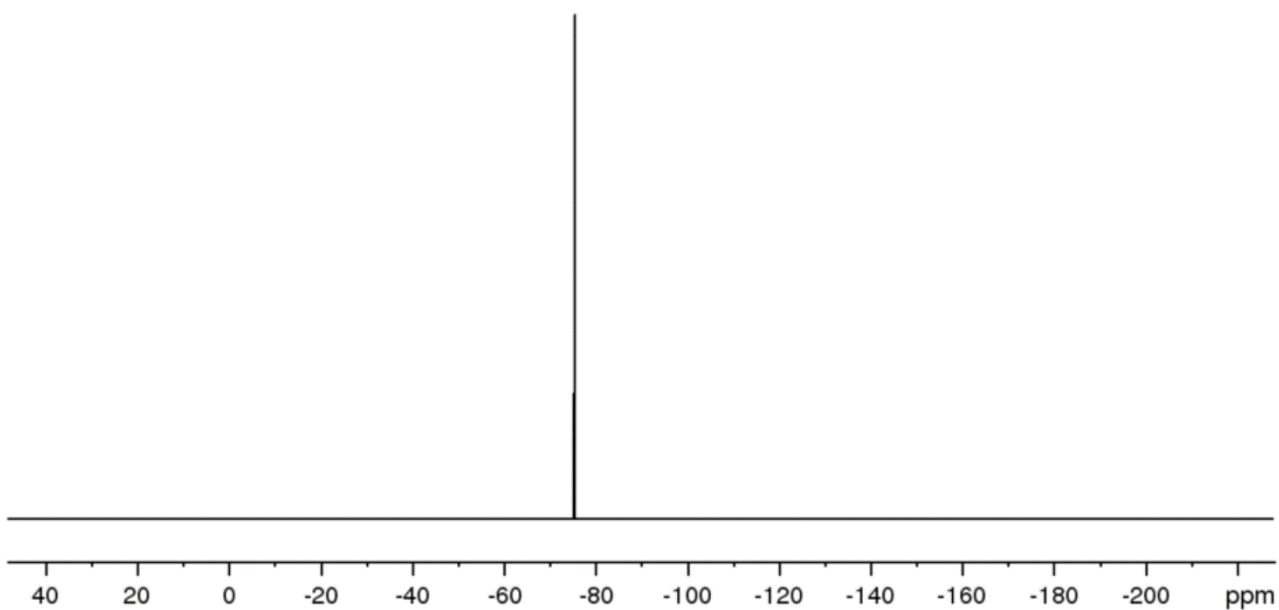

Figure S32:  $^{19}\text{F}\{^1\text{H}\}$  NMR spectrum of  $[\{\text{CpMo}(\text{CO})_2\}_4(\mu_4, \eta^2: \eta^2: \eta^2: \eta^2\text{-AsBiBiAs})][\text{TEF}]_2$  (**4a**) in  $\text{CD}_2\text{Cl}_2$ .

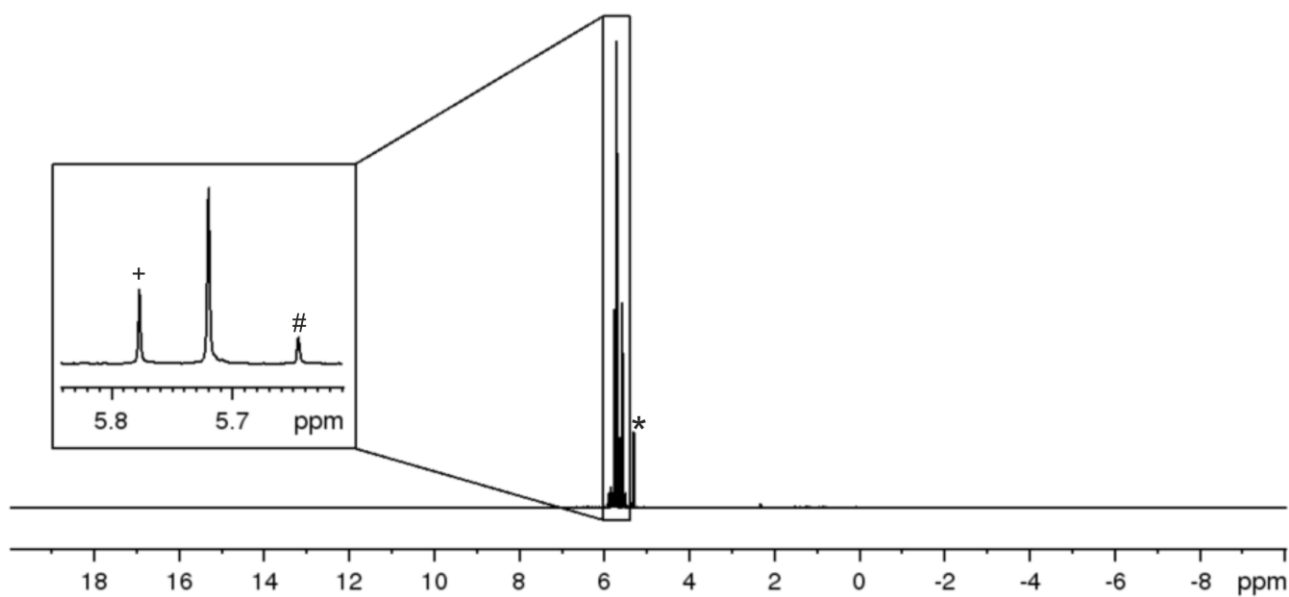

Figure S33:  $^1\text{H}$  NMR spectrum of  $[\{\text{CpMo}(\text{CO})_2\}_4(\mu_4, \eta^2: \eta^2: \eta^2: \eta^2\text{-BiSbSbBi})][\text{TEF}]_2$  (**5**) in  $\text{CD}_2\text{Cl}_2$ ; \* =  $\text{CD}_2\text{Cl}_2$ , # = **XI**, + = **XII**.

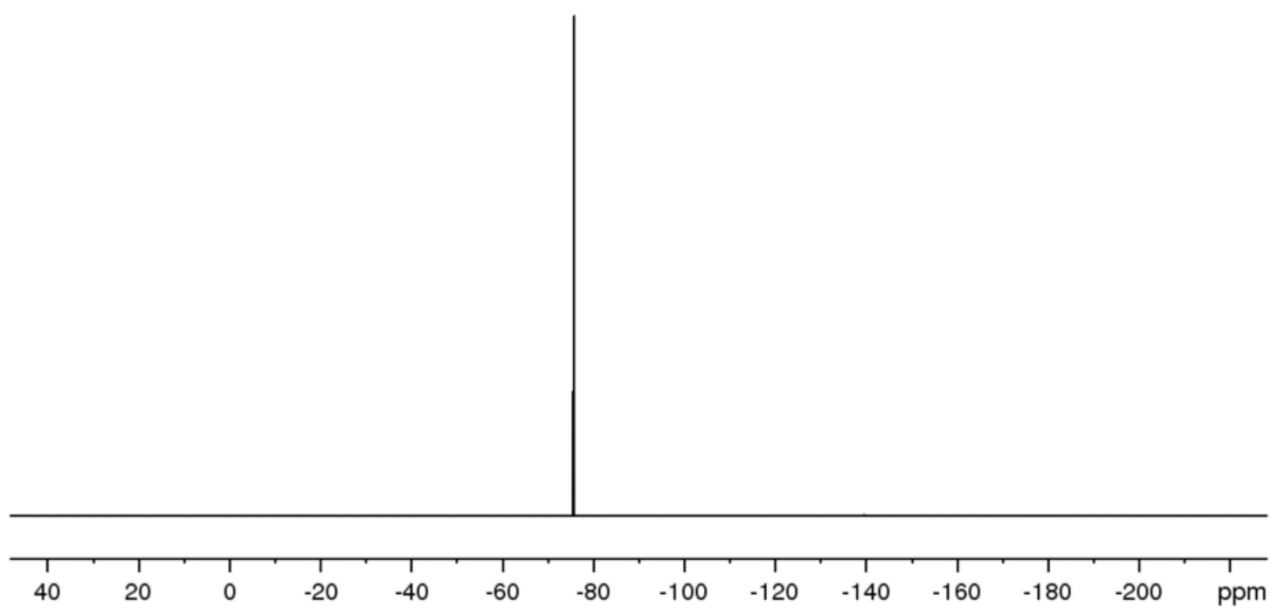

**Figure S34:**  $^{19}\text{F}\{^1\text{H}\}$  NMR spectrum of  $[\{\text{CpMo}(\text{CO})_2\}_4(\mu_4, \eta^2: \eta^2: \eta^2: \eta^2\text{-BiSbSbBi})][\text{TEF}]_2$  (**5**) in  $\text{CD}_2\text{Cl}_2$ .



## 5 Mass spectrometry

The mass spectra, which were recorded by the mass spectrometry department of the University of Regensburg, are not available to the authors in a digital format and, therefore, could not be displayed in the following.

### 5.1 ESI mass spectrometry of [Thia][TEF<sup>Cl</sup>]

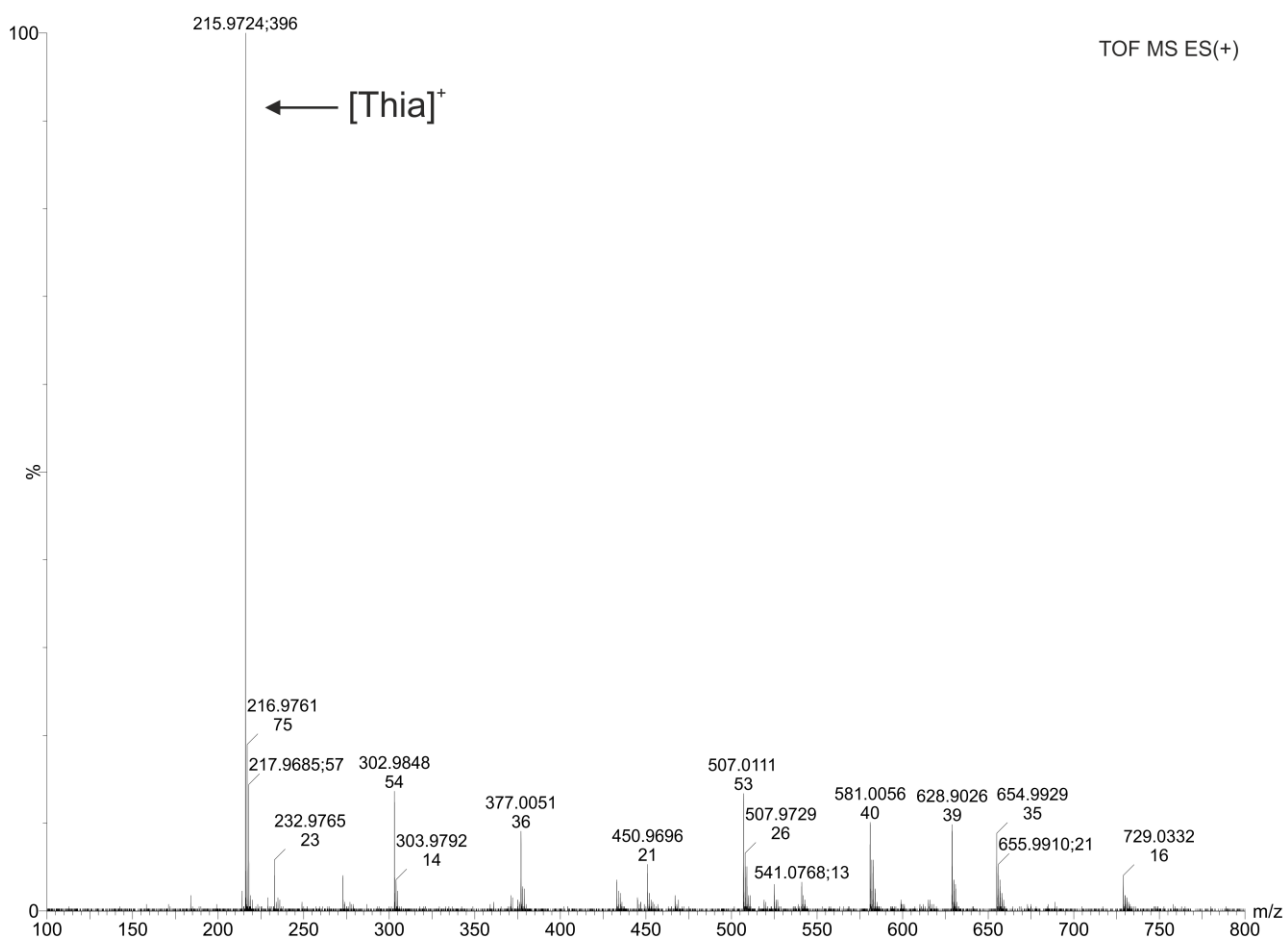

Figure S35: ESI(+) MS spectrum of [Thia][TEF<sup>Cl</sup>].

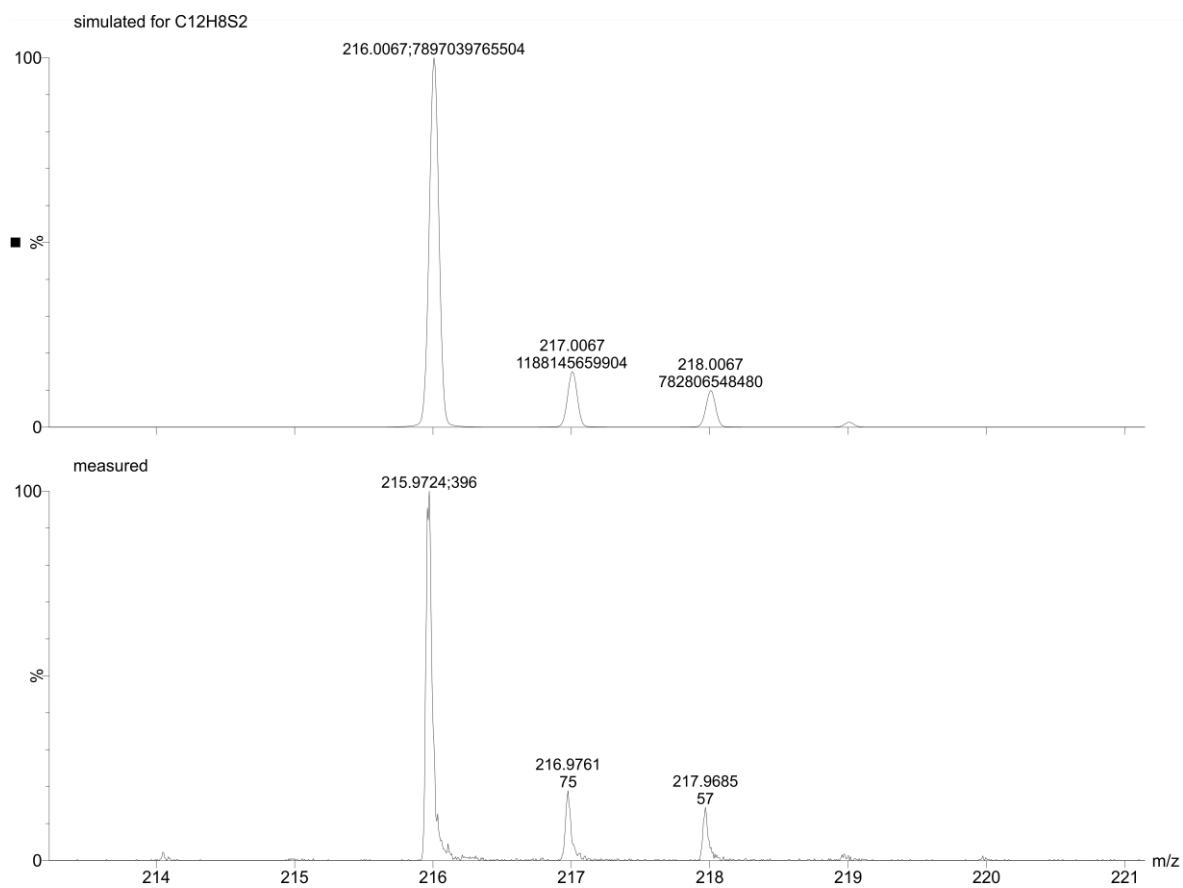

Figure S36: Molecular ion peak of [Thia]<sup>+</sup>. Bottom: measured spectrum, top: simulated spectrum.

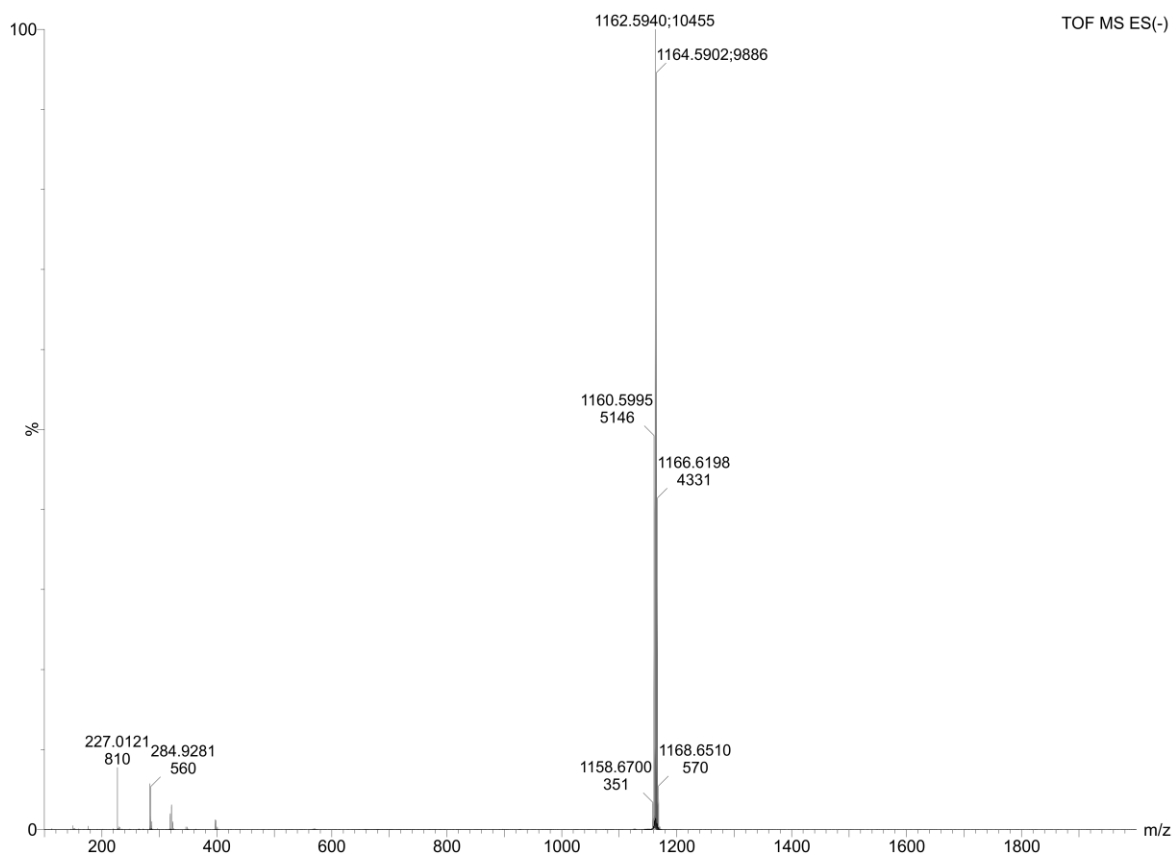

Figure S37: ESI(-) MS spectrum of [Thia][TEF<sup>Cl</sup>].

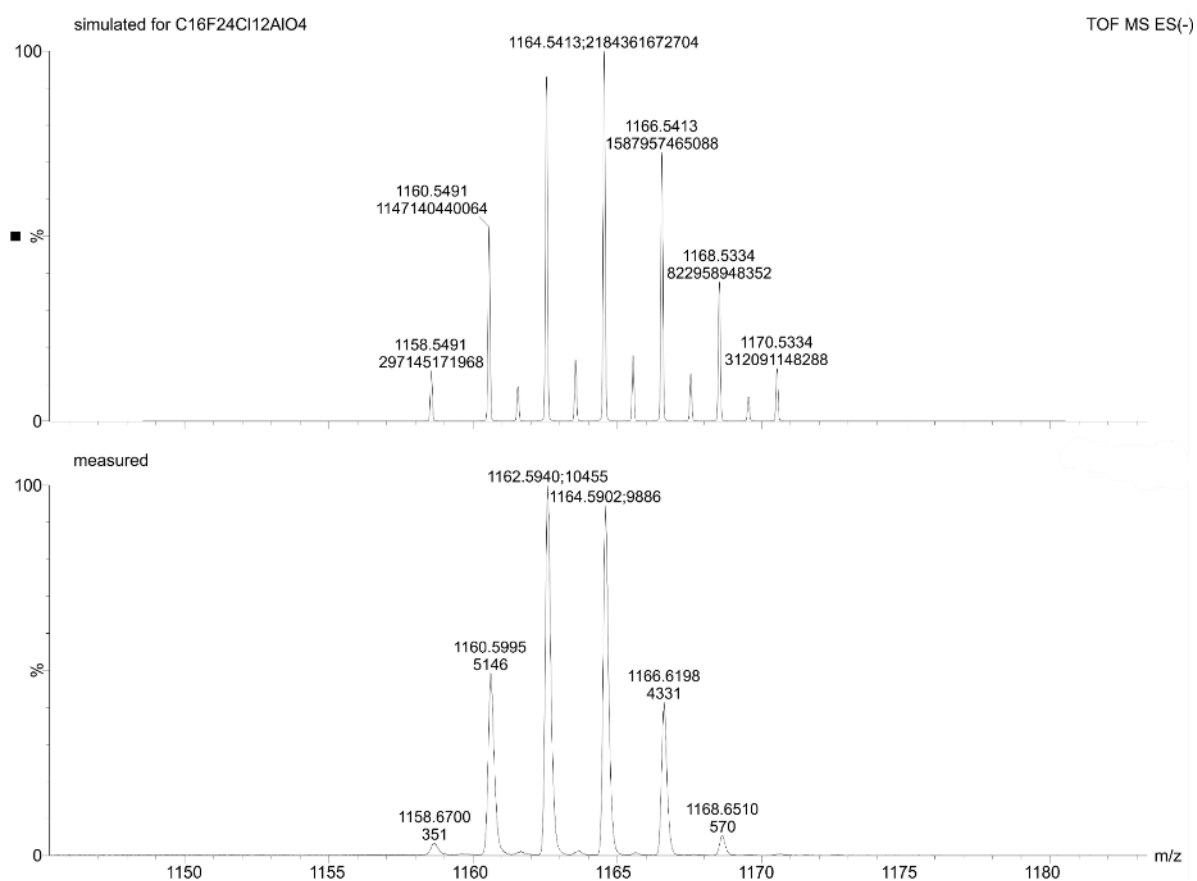

**Figure S38:** Molecular ion peak of  $[\text{TEFCl}]^-$ . Bottom: measured spectrum, top: simulated spectrum.

## 5.2 ESI mass spectrometry of 1:

The ESI mass spectrum of a  $\text{CH}_2\text{Cl}_2$  solution of crystalline **1** (Figure S39) clearly shows signals assignable to the monocationic species  $[\text{A}]^+$ ,  $[\text{A}-1(\text{CO})]^+$ ,  $[\text{A}-2(\text{CO})]^+$ ,  $[\text{A}-3(\text{CO})]^+$  and  $[\text{A}-4(\text{CO})]^+$ . However, by varying the extraction cone voltages one can also record signals for a dicationic species, which can be assigned to  $[\text{A}_2-2(\text{CO})]^{2+}$  (Figure S40). Additionally, some small peaks ( $\approx 7:1$  intensity, shifted by  $\approx 0.5$  Da) are detected in the  $m/z$  regions for signals, which may be assigned to  $[\text{A}-\text{CO}-\text{O}]^+$  and  $[\text{A}-2(\text{CO})]^+$ . The overlay of the latter signals with monocationic species though does not allow a reliable assignment by isotopic distribution modelling of these species and the reported formulas in Figure S40 should be regarded as suggested species.

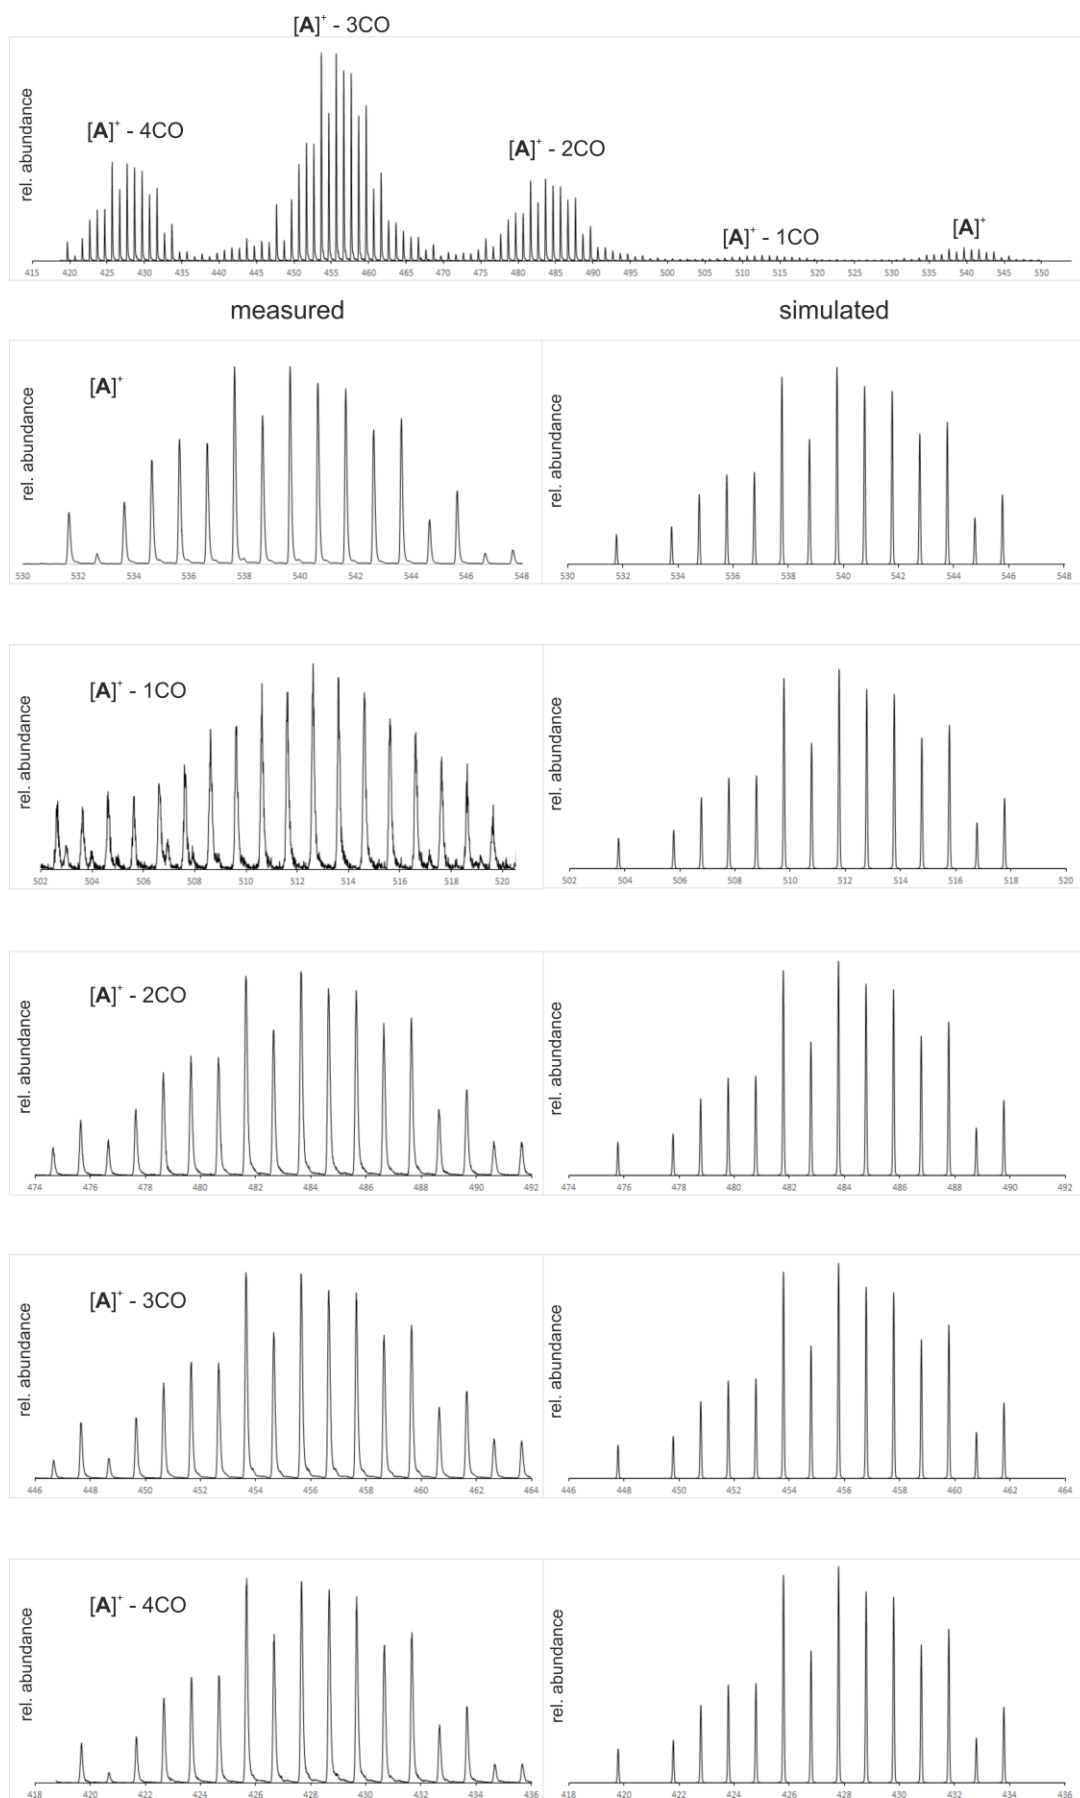

**Figure S39:** (top) ESI MS spectrum of **1** from  $\text{CH}_2\text{Cl}_2$ . Measured (left) and simulated (right) isotopic distribution for the assignable peaks.

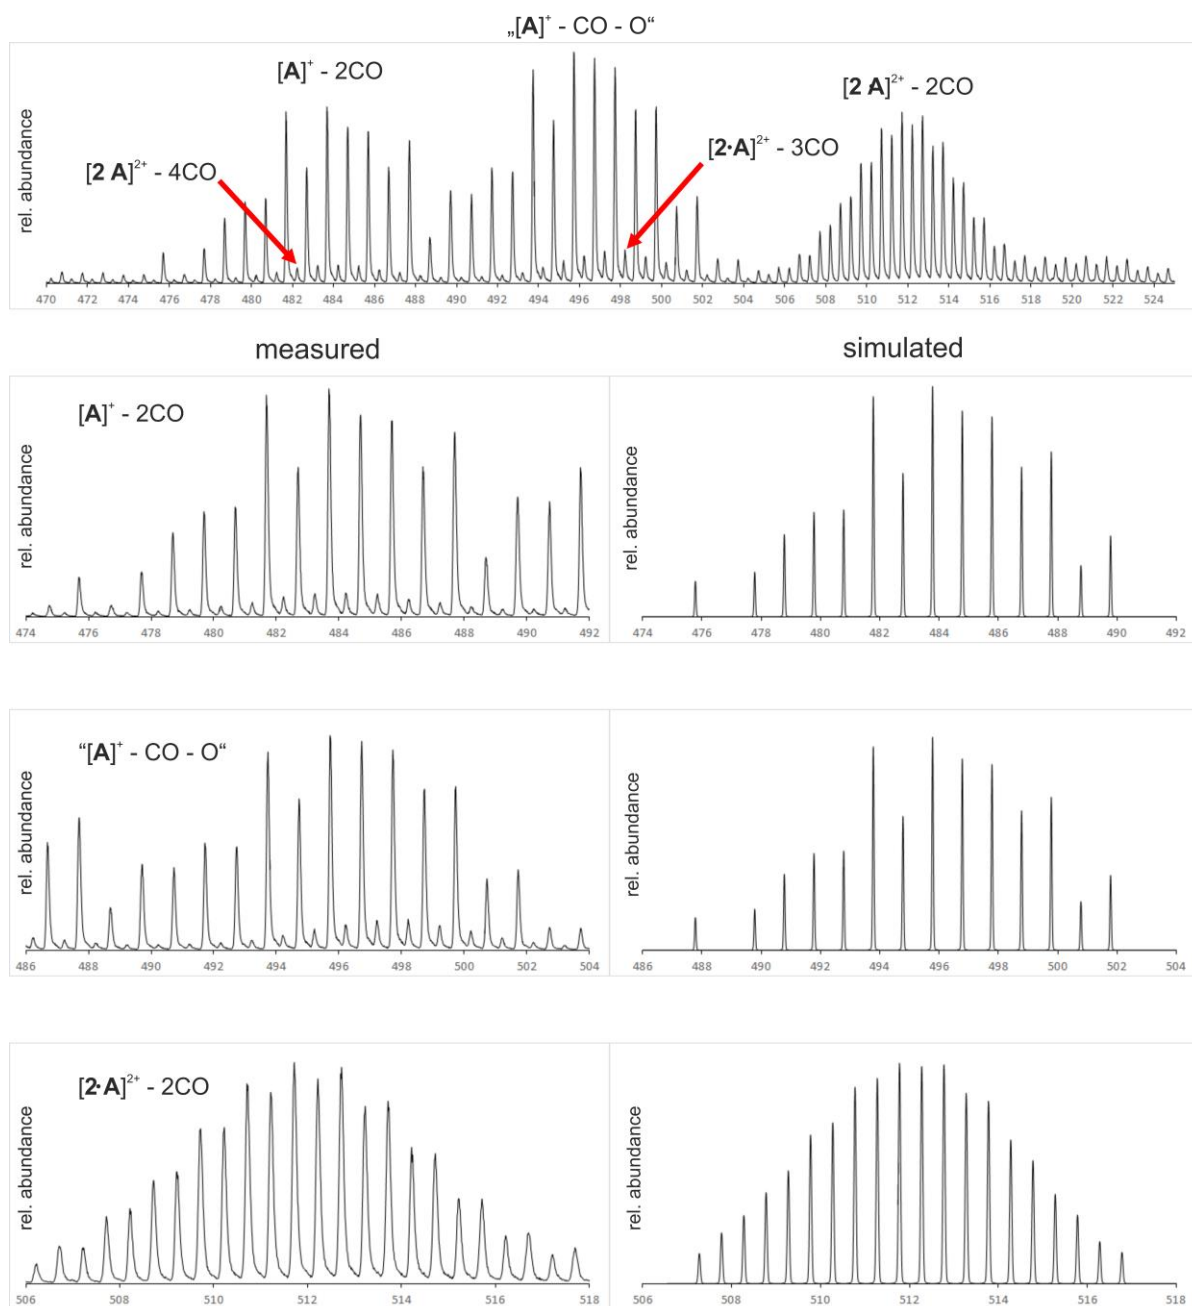

**Figure S40:** (top) ESI MS spectrum of **1** from  $CH_2Cl_2$  after varying the extraction cone voltage. Measured (left) and simulated (right) isotopic distribution for the assignable peaks.

### 5.3 ESI mass spectrometry of 3a:

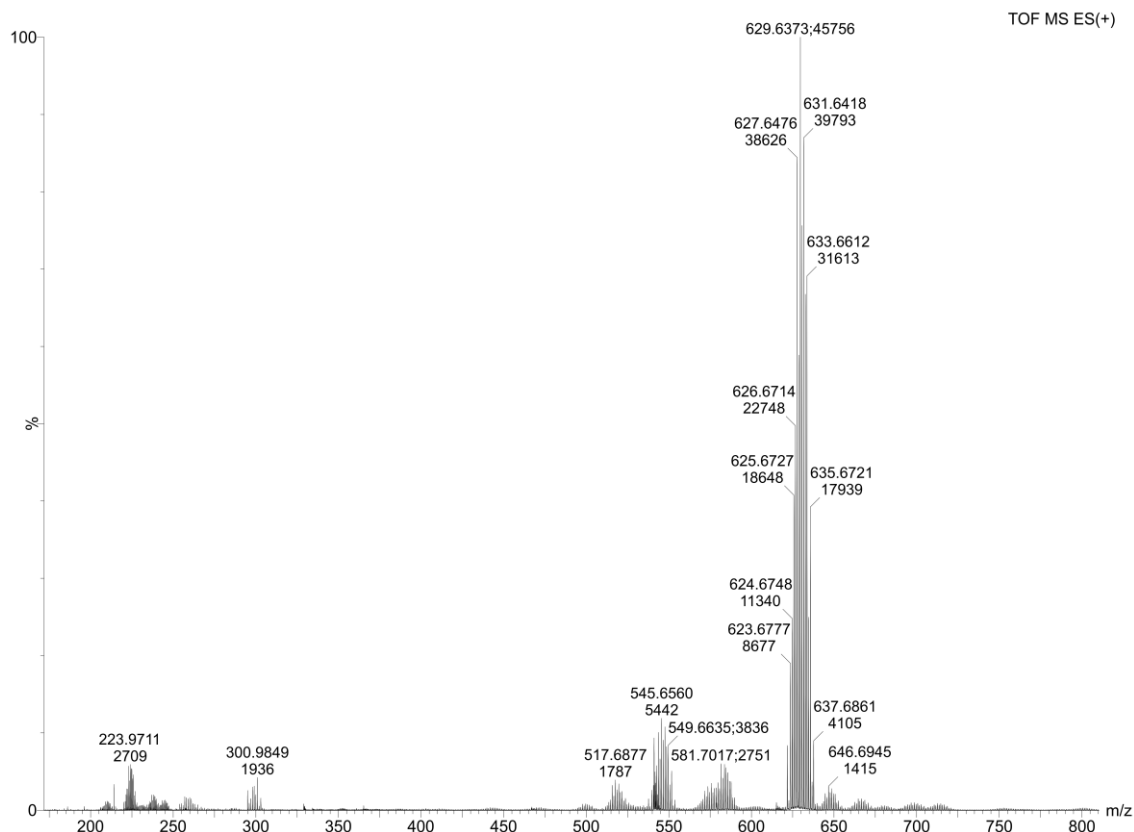

Figure S41: ESI(+) MS spectrum of 3a.

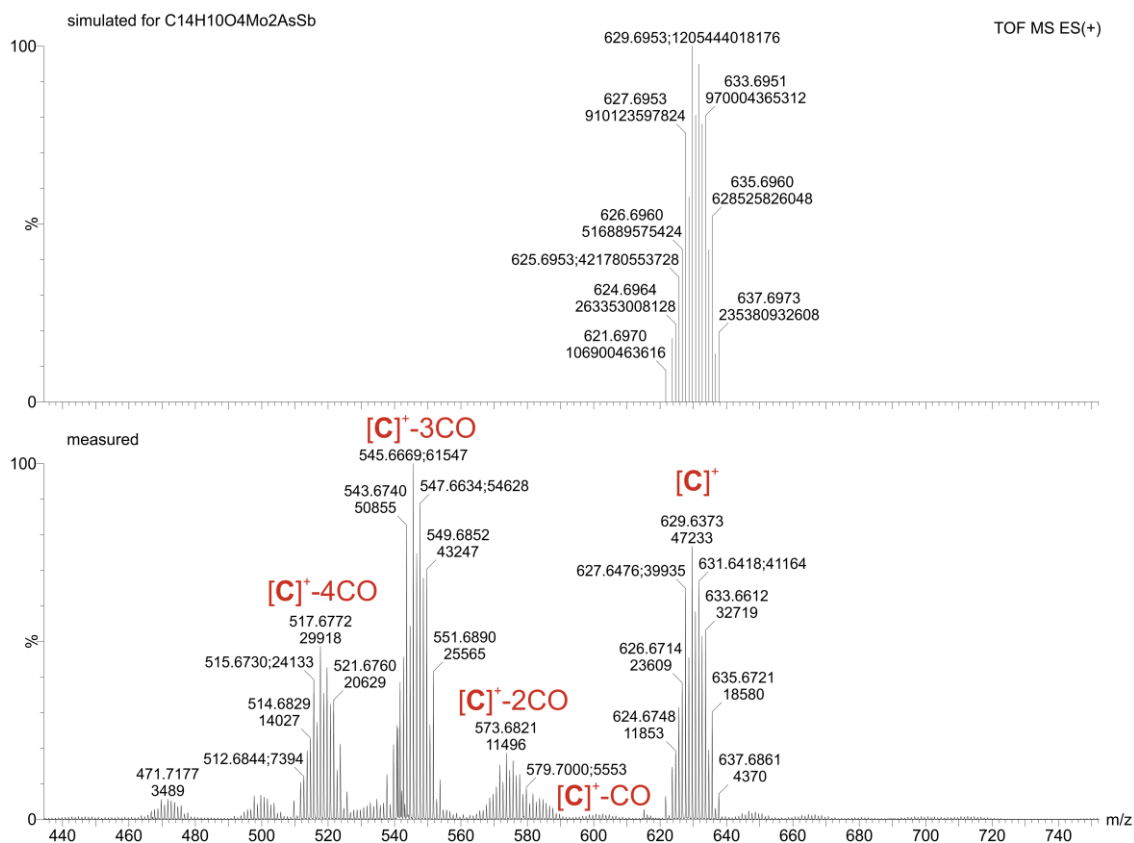

Figure S42: Assignable signals in the ESI(+) MS spectrum of 3a. Bottom: measured spectrum, top: simulated molecular ion peak [C]<sup>+</sup>.

## 5.4 ESI mass spectrometry of 3b:

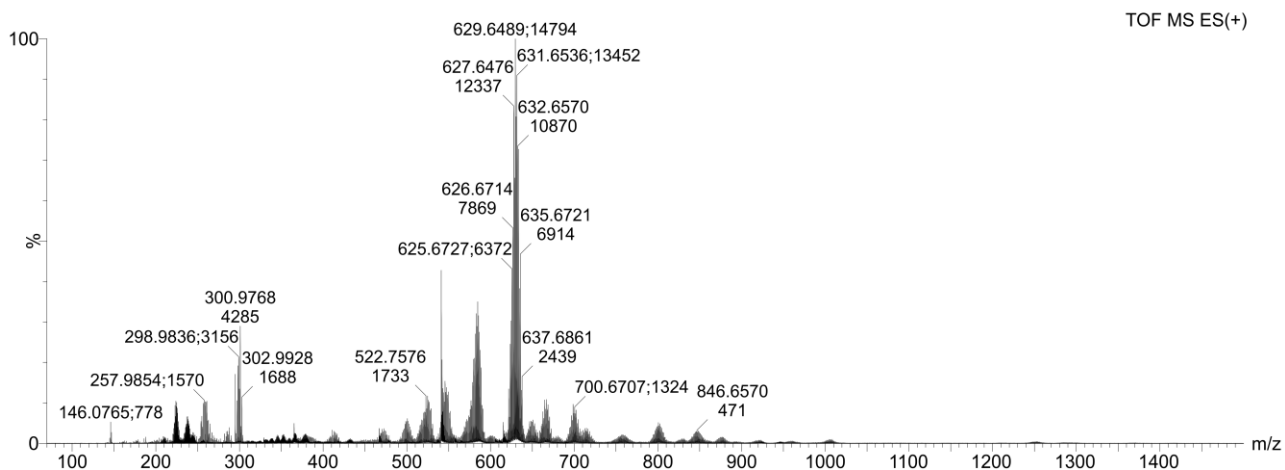

Figure S43: ESI(+) MS spectrum of 3b.

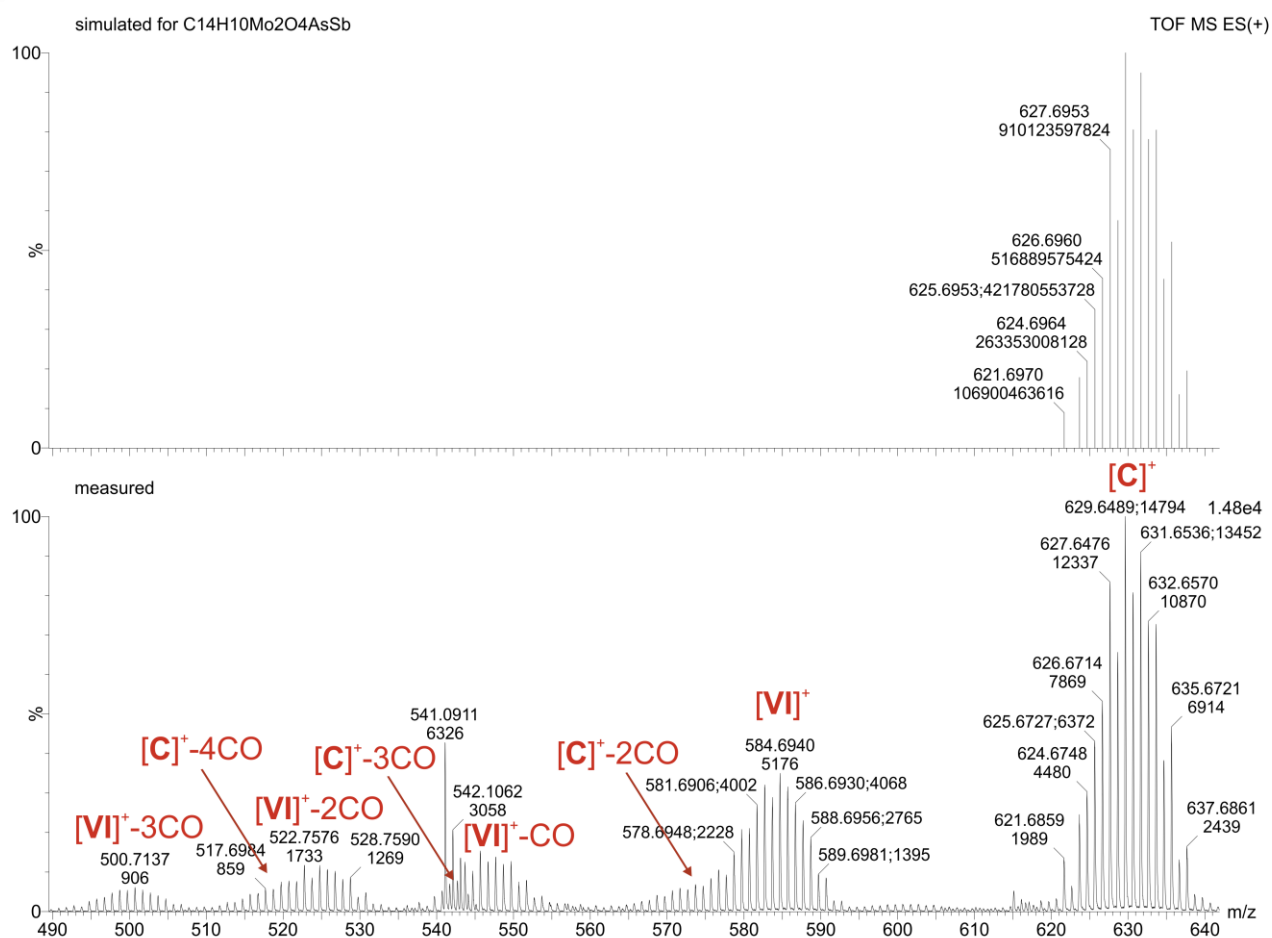

Figure S44: Assignable signals in the ESI(+) MS spectrum of 3b. Bottom: measured spectrum, top: simulated molecular ion peak of [C]<sup>+</sup>.

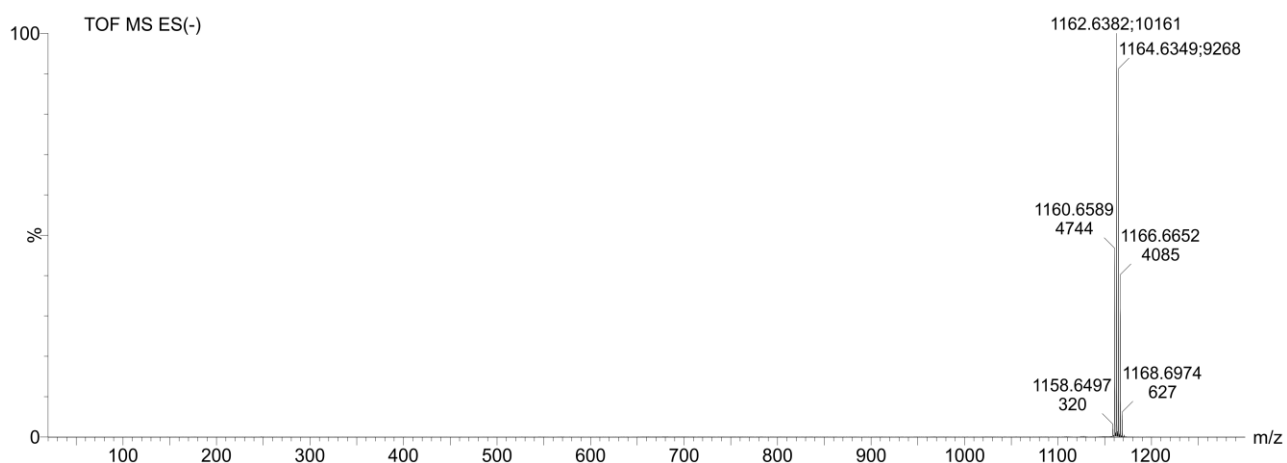

Figure S45: ESI(-) MS spectrum of **3b**.

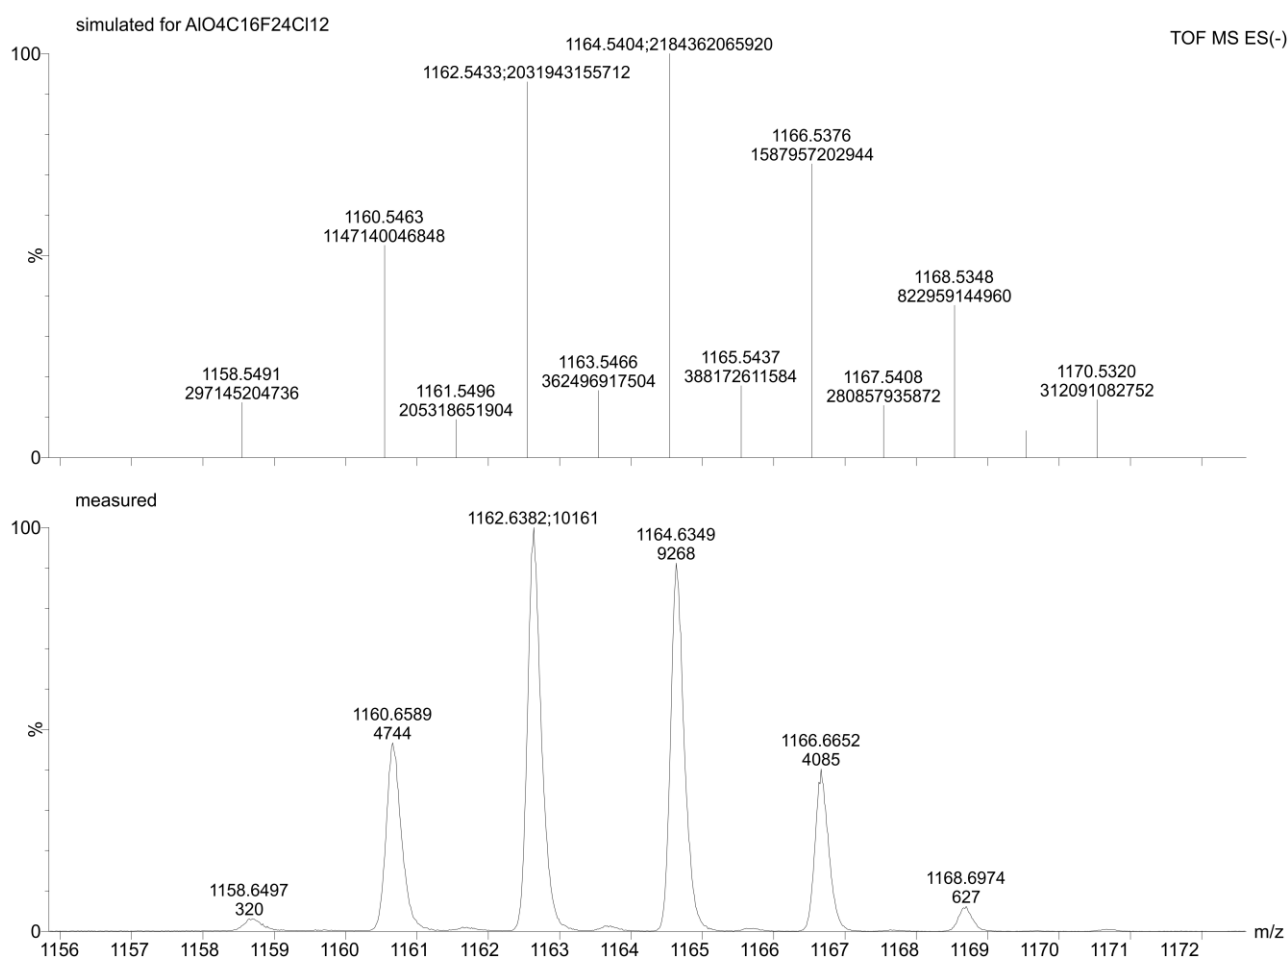

Figure S46: Molecular ion peak of [TEFCl]<sup>-</sup> in the ESI(-) MS spectrum of **3b**. Bottom: measured spectrum, top: simulated spectrum.



## 6 EPR spectra

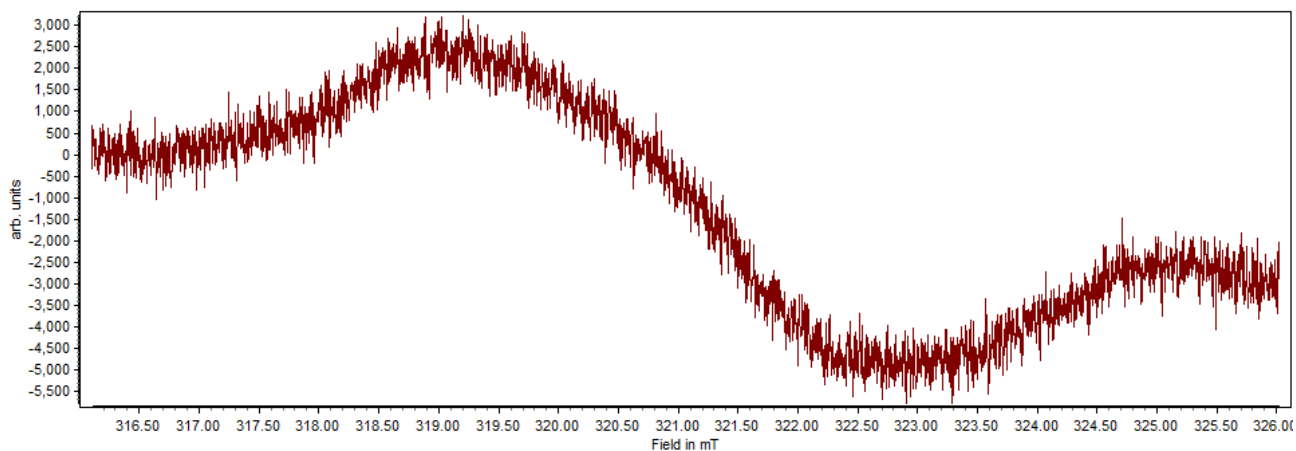

Figure S47: X-Band EPR spectrum of **1** at room temperature showing no signal.

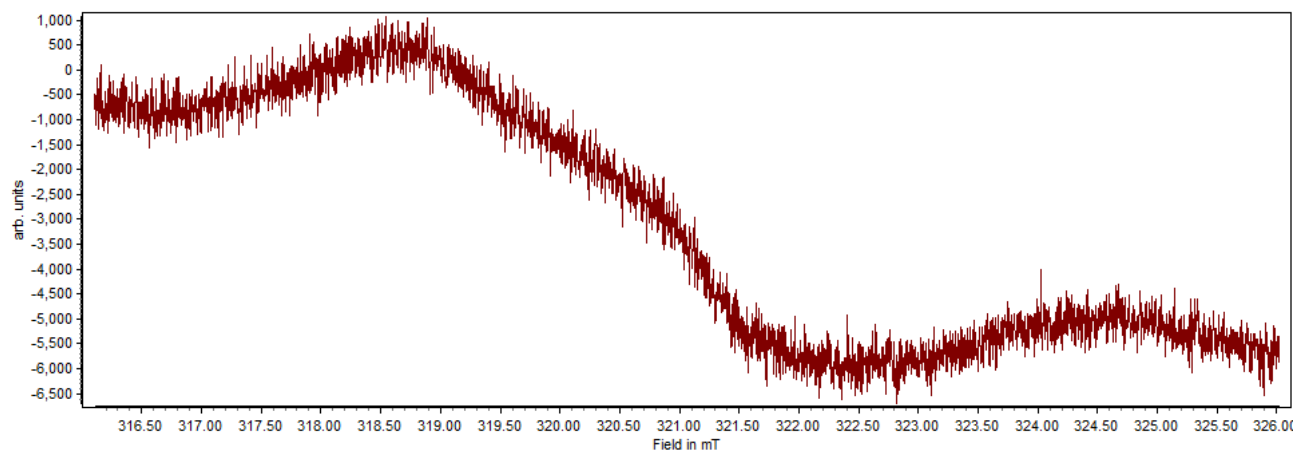

Figure S48: X-Band EPR spectrum of **1** at 77 K showing no signal.

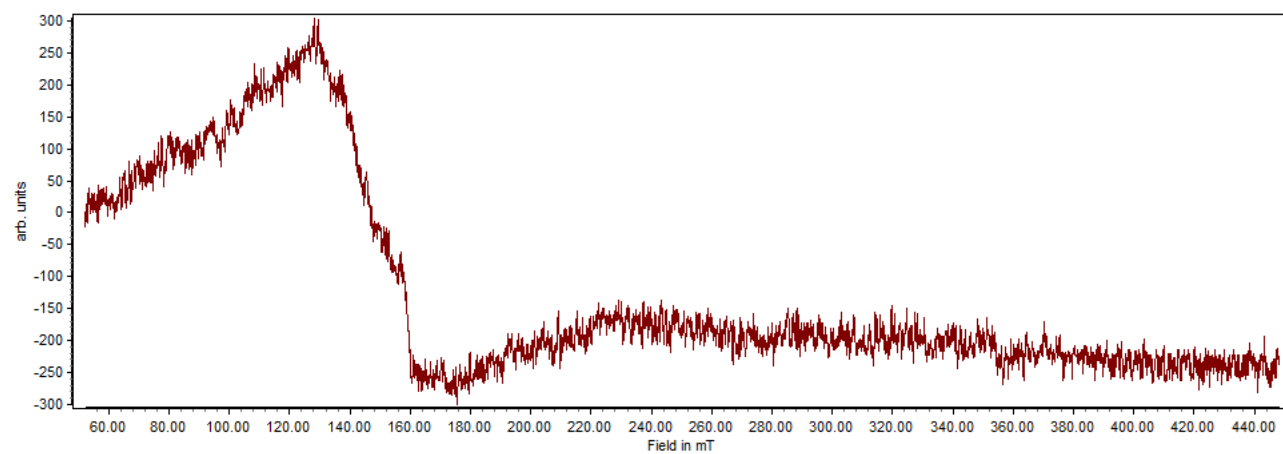

Figure S49: X-Band EPR spectrum of **2** at room temperature showing no signal. The "signal" at ~145 mT arises from the glass measuring apparatus, which was used and contains Fe.

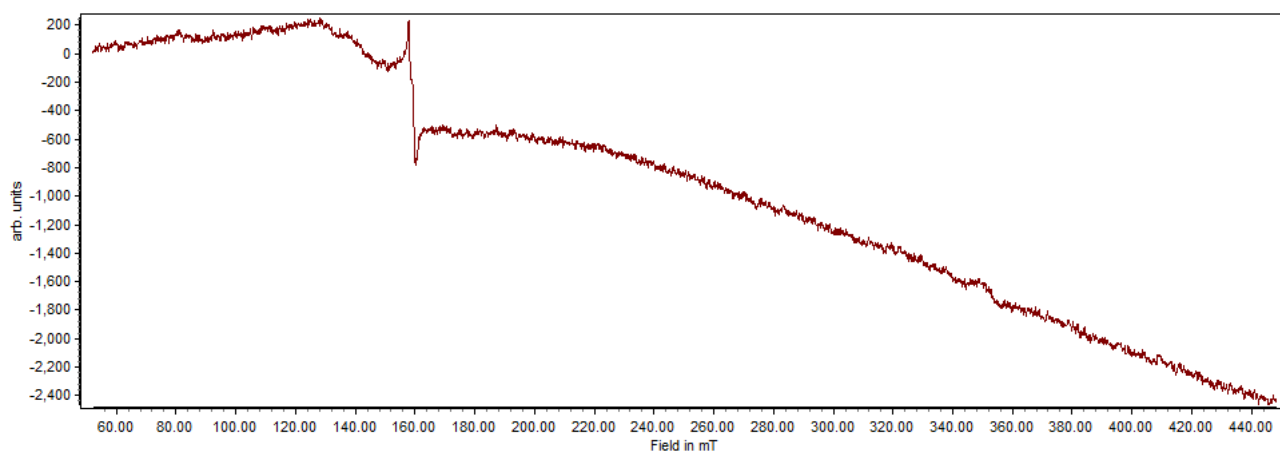

**Figure S50:** X-Band EPR spectrum of **2** at 77 K showing no signal. The "signal" at ~145 mT arises from the glass measuring apparatus, which was used and contains Fe.

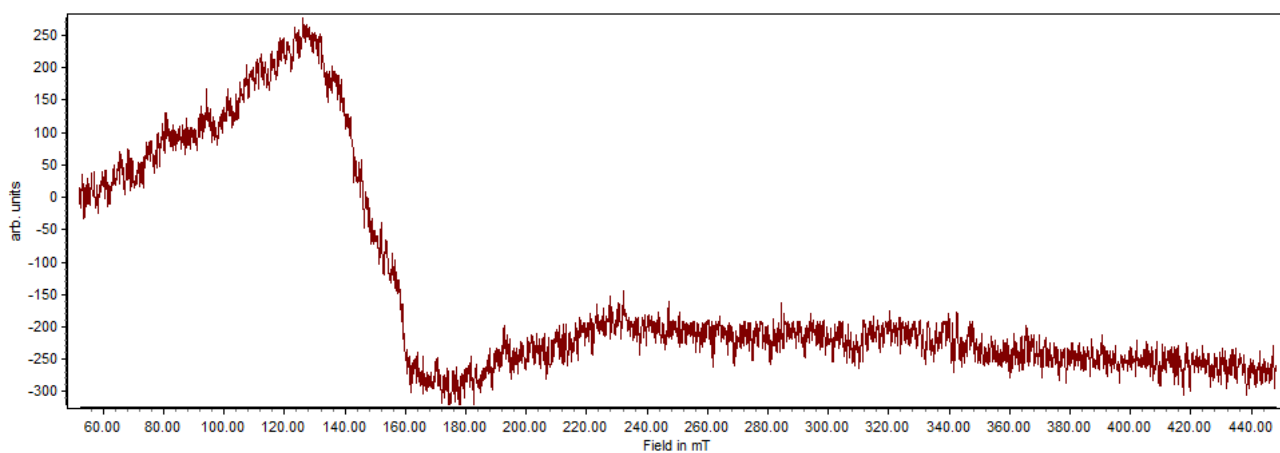

**Figure S51:** X-Band EPR spectrum of **3a** at room temperature showing no signal. The "signal" at ~145 mT arises from the glass measuring apparatus, which was used and contains Fe.

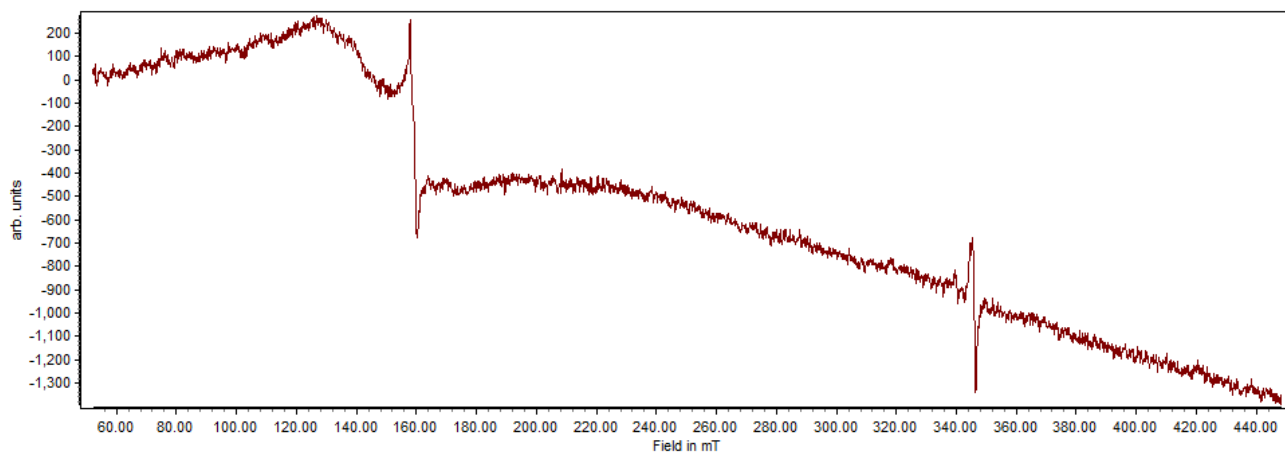

**Figure S52:** X-Band EPR spectrum of **3a** at 77 K showing a very weak axial signal ( $g_{iso} = 1.954$ ). The "signal" at ~145 mT arises from the glass measuring apparatus, which was used and contains Fe.

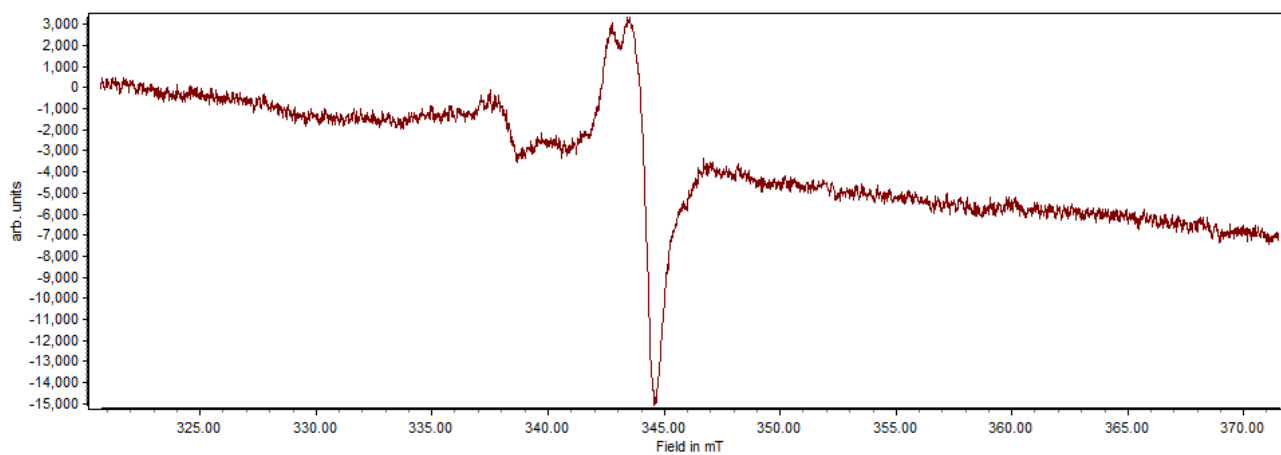

**Figure S53:** X-Band EPR spectrum of **3a** at 77 K from 320–370 mT showing a very weak axial signal ( $g_{\text{iso}} = 1.954$ ).

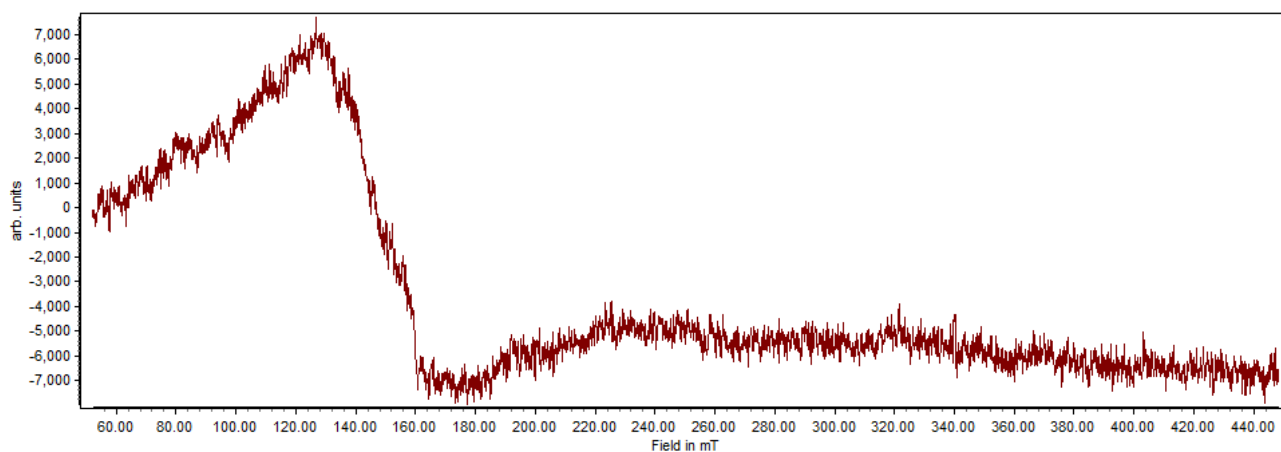

**Figure S54:** X-Band EPR spectrum of **4a** at room temperature showing no signal. The "signal" at  $\sim 145$  mT arises from the glass measuring apparatus, which was used and contains Fe.

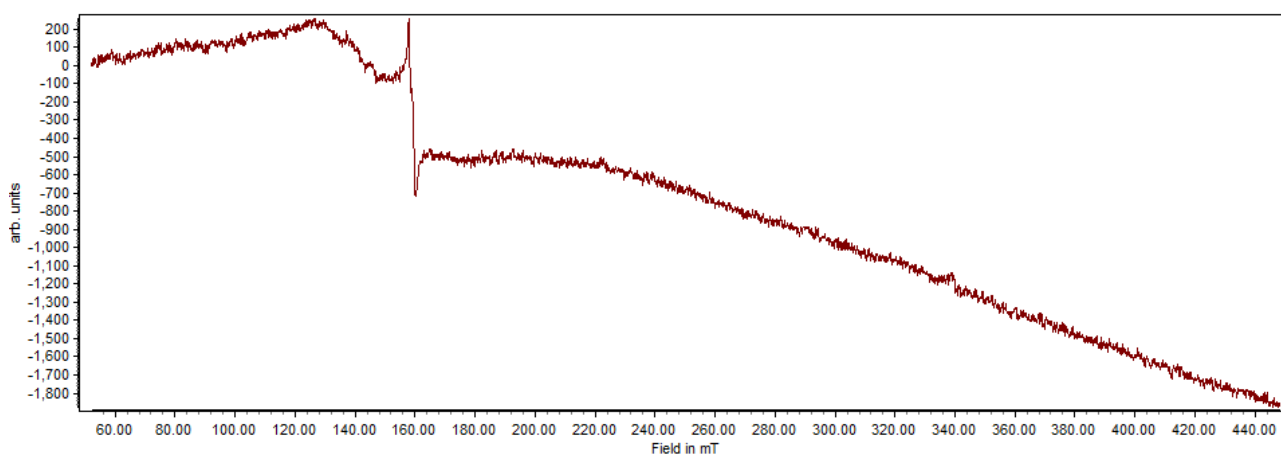

**Figure S55:** X-Band EPR spectrum of **4a** at 77 K showing no signal. The "signal" at  $\sim 145$  mT arises from the glass measuring apparatus, which was used and contains Fe.

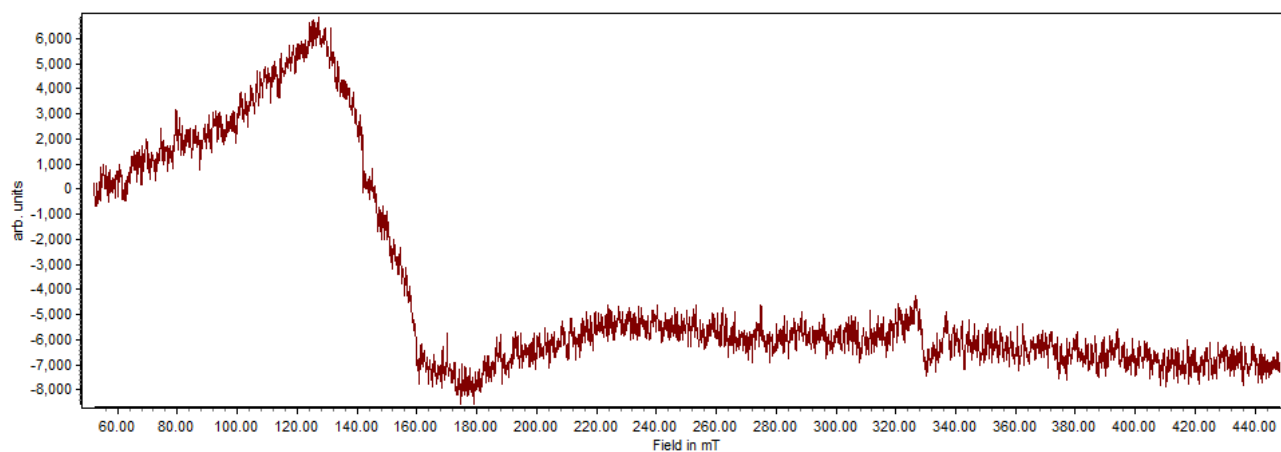

**Figure S56:** X-Band EPR spectrum of **4b** at room temperature showing no signal. The "signal" at ~145 mT arises from the glas measuring apparatus, which was used and contains Fe.

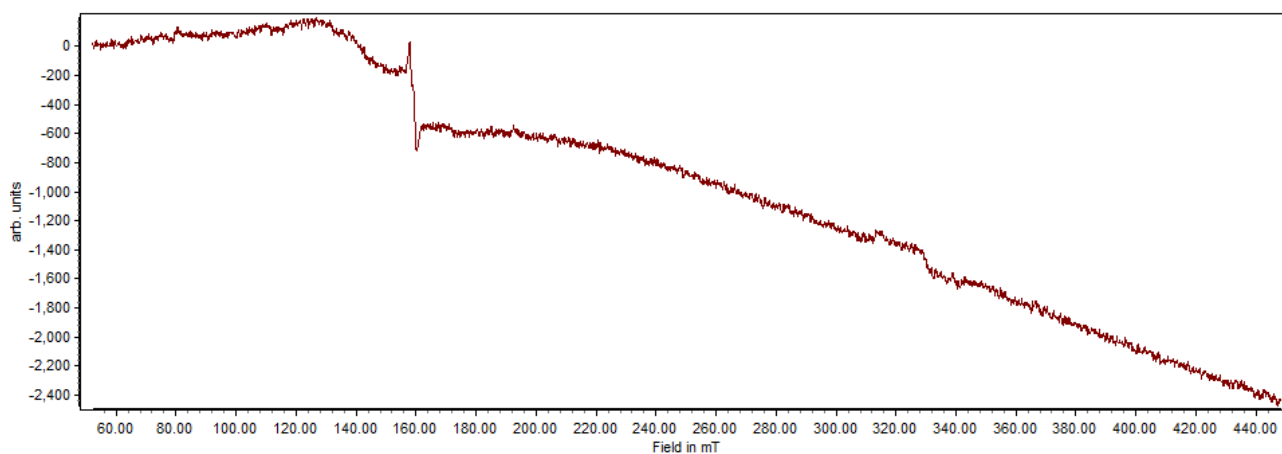

**Figure S57:** X-Band EPR spectrum of **4b** at 77 K showing no signal. The "signal" at ~145 mT arises from the glas measuring apparatus, which was used and contains Fe.

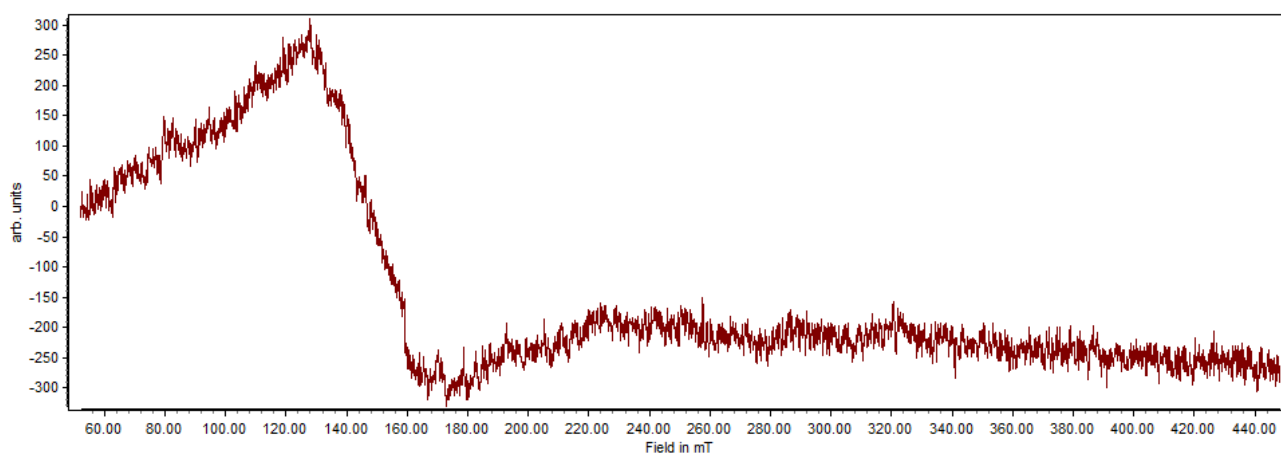

**Figure S58:** X-Band EPR spectrum of **5** at room temperature showing no signal. The "signal" at ~145 mT arises from the glas measuring apparatus, which was used and contains Fe.

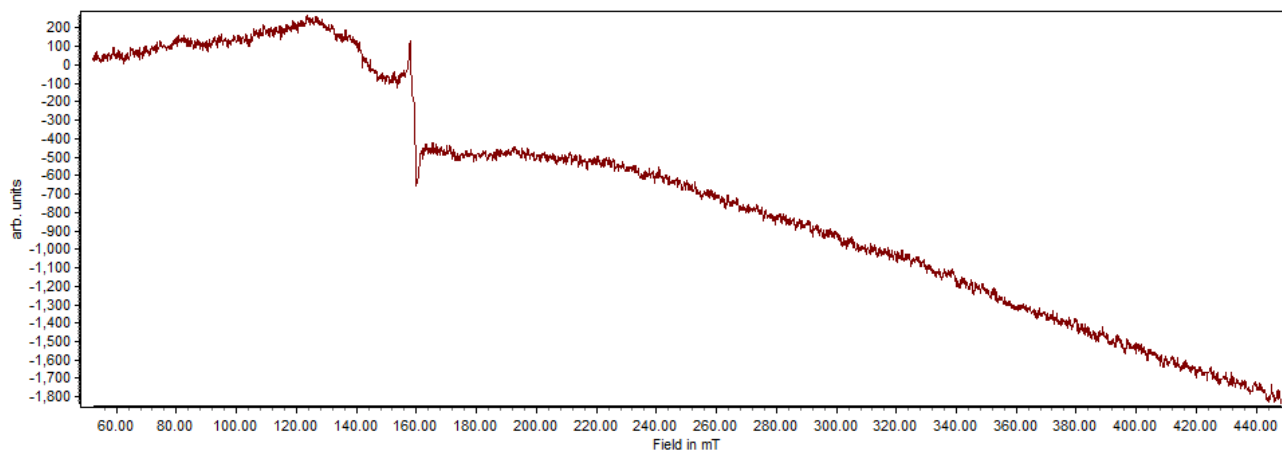

**Figure S59:** X-Band EPR spectrum of **5** at 77 K showing no signal. The "signal" at ~145 mT arises from the glass measuring apparatus, which was used and contains Fe.

## 7 X-ray crystallography

All crystal manipulations were performed under mineral oil. The diffraction experiments were performed at 123 K (if not stated otherwise) either on a Rigaku (former Agilent Technologies or Oxford Diffraction) SuperNova Single Source with an Atlas detector, a Gemini Ultra with an AtlasS2 detector, on a GV50 diffractometer with a TitanS2 detector or on a XtaLAB Synergy R DW system with a HyPix-Arc 150 detector using Cu- $K_{\alpha}$ , Cu- $K_{\beta}$  or Mo- $K_{\alpha}$  radiation. Crystallographic data together with the details of the experiments are given in Table S1 and Table S2. The cell determination, data reduction and absorption correction for all compounds were performed with the help of the CrysAlis PRO software.<sup>5</sup> All structures were solved by using the programs SHELXT<sup>6</sup> and Olex2.<sup>7</sup> The full-matrix least-squares refinement against  $F^2$  was done using SHELXL<sup>8</sup> and Olex2.<sup>7</sup> If not stated otherwise, all atoms except hydrogen atoms were refined anisotropically. The H atoms were calculated geometrically and a riding model was used during the refinement process.

CCDC-2105248 (**1**), CCDC-2105249 (**3a**), CCDC-2105250 (**3b**), CCDC-2105251 (**4a**), CCDC-2105252 (**4b**) and CCDC-2105253 (**5**), contain the supplementary crystallographic data for this paper. These data can be obtained free of charge at [www.ccdc.cam.ac.uk/conts/retrieving.html](http://www.ccdc.cam.ac.uk/conts/retrieving.html) (or from the Cambridge Crystallographic Data Centre, 12 Union Road, Cambridge CB2 1EZ, UK; Fax: + 44-1223-336-033; e-mail: [deposit@ccdc.cam.ac.uk](mailto:deposit@ccdc.cam.ac.uk)).

**Table S1:** Crystallographic details for the compounds **1**, **2**, **3a** and **4a**.

|                                                                                      | <b>1</b>                                                                                                                       | <b>2</b>                                                                                                                       | <b>3a</b>                                                                                                                       | <b>4a</b>                                                                                                                                                   |
|--------------------------------------------------------------------------------------|--------------------------------------------------------------------------------------------------------------------------------|--------------------------------------------------------------------------------------------------------------------------------|---------------------------------------------------------------------------------------------------------------------------------|-------------------------------------------------------------------------------------------------------------------------------------------------------------|
| formula                                                                              | C <sub>60</sub> H <sub>20</sub> Al <sub>2</sub> As <sub>2</sub> F <sub>72</sub> Mo <sub>4</sub> O <sub>16</sub> P <sub>2</sub> | C <sub>60</sub> H <sub>20</sub> Al <sub>2</sub> F <sub>72</sub> Mo <sub>4</sub> O <sub>16</sub> P <sub>2</sub> Sb <sub>2</sub> | C <sub>60</sub> H <sub>20</sub> Al <sub>2</sub> F <sub>72</sub> Mo <sub>4</sub> O <sub>16</sub> As <sub>2</sub> Sb <sub>2</sub> | C <sub>60.1</sub> H <sub>19.2</sub> Al <sub>2</sub> As <sub>2.12</sub> Bi <sub>1.88</sub> Cl <sub>0.2</sub> F <sub>72</sub> Mo <sub>4</sub> O <sub>16</sub> |
| weight [g·mol <sup>-1</sup> ]                                                        | 3014.26                                                                                                                        | 3277.77                                                                                                                        | 3195.82                                                                                                                         | 3361.68                                                                                                                                                     |
| Temperature [K]                                                                      | 123.0(1)                                                                                                                       | 123.0(1)                                                                                                                       | 100.01(10)                                                                                                                      | 123.0(1)                                                                                                                                                    |
| crystal system                                                                       | monoclinic                                                                                                                     | monoclinic                                                                                                                     | orthorhombic                                                                                                                    | triclinic                                                                                                                                                   |
| space group                                                                          | <i>P</i> 2 <sub>1</sub> / <i>n</i>                                                                                             | <i>P</i> 2 <sub>1</sub> / <i>m</i>                                                                                             | <i>Pbca</i>                                                                                                                     | <i>P</i> $\bar{1}$                                                                                                                                          |
| <i>a</i> [Å]                                                                         | 15.48296(15)                                                                                                                   | 16.5312(16)                                                                                                                    | 27.8964(2)                                                                                                                      | 14.9100(3)                                                                                                                                                  |
| <i>b</i> [Å]                                                                         | 21.4711(2)                                                                                                                     | 14.7868(11)                                                                                                                    | 22.20040(10)                                                                                                                    | 15.9359(6)                                                                                                                                                  |
| <i>c</i> [Å]                                                                         | 26.9785(3)                                                                                                                     | 20.505(2)                                                                                                                      | 29.7016(2)                                                                                                                      | 20.4158(7)                                                                                                                                                  |
| $\alpha$ [°]                                                                         | 90                                                                                                                             | 90                                                                                                                             | 90                                                                                                                              | 80.965(3)                                                                                                                                                   |
| $\beta$ [°]                                                                          | 90.8706(9)                                                                                                                     | 105.272(12)                                                                                                                    | 90                                                                                                                              | 82.393(2)                                                                                                                                                   |
| $\gamma$ [°]                                                                         | 90                                                                                                                             | 90                                                                                                                             | 90                                                                                                                              | 75.244(2)                                                                                                                                                   |
| Volume [Å <sup>3</sup> ]                                                             | 8967.59(15)                                                                                                                    | 4835.3(8)                                                                                                                      | 18394.5.5(2)                                                                                                                    | 4611.0(3)                                                                                                                                                   |
| <i>Z</i>                                                                             | 4                                                                                                                              | 4                                                                                                                              | 8                                                                                                                               | 2                                                                                                                                                           |
| $\rho_{calc}$ [g·cm <sup>-3</sup> ]                                                  | 2.233                                                                                                                          |                                                                                                                                | 2.308                                                                                                                           | 2.421                                                                                                                                                       |
| $\mu$ [mm <sup>-1</sup> ]                                                            | 7.820                                                                                                                          |                                                                                                                                | 2.047                                                                                                                           | 5.088                                                                                                                                                       |
| <i>F</i> (000)                                                                       | 5784.0                                                                                                                         |                                                                                                                                | 12144                                                                                                                           | 3158                                                                                                                                                        |
| crystal size [mm <sup>3</sup> ]                                                      | 0.260 × 0.144 × 0.100                                                                                                          |                                                                                                                                | 0.174 × 0.119 × 0.109                                                                                                           | 0.606 × 0.135 × 0.13                                                                                                                                        |
| diffractometer                                                                       | SuperNova                                                                                                                      | GV50                                                                                                                           | XtaLAB Synergy R, DW system                                                                                                     | Gemini Ultra                                                                                                                                                |
| absorption correction                                                                | gaussian                                                                                                                       |                                                                                                                                | gaussian                                                                                                                        | gaussian                                                                                                                                                    |
| <i>T</i> <sub>min</sub> / <i>T</i> <sub>max</sub>                                    | 0.349 / 0.602                                                                                                                  |                                                                                                                                | 0.727 / 1.000                                                                                                                   | 0.354 / 0.760                                                                                                                                               |
| radiation [Å]                                                                        | Cu-K $\alpha$ ( $\lambda$ = 1.54184)                                                                                           | Cu-K $\alpha$ ( $\lambda$ = 1.54184)                                                                                           | Mo-K $\alpha$ ( $\lambda$ = 0.71073)                                                                                            | Mo-K $\alpha$ ( $\lambda$ = 0.71073)                                                                                                                        |
| 2 $\theta$ range [°]                                                                 | 6.996 to 147.820                                                                                                               |                                                                                                                                | 3.670 to 65.154                                                                                                                 | 6.732 to 61.016                                                                                                                                             |
| completeness [%]                                                                     | 99.3                                                                                                                           |                                                                                                                                | 100                                                                                                                             | 99.2                                                                                                                                                        |
| reflns collected / unique                                                            | 42829 / 17600                                                                                                                  |                                                                                                                                | 437712 / 33485                                                                                                                  | 48635 / 27938                                                                                                                                               |
| <i>R</i> <sub>int</sub> / <i>R</i> <sub>sigma</sub>                                  | 0.0239 / 0.0264                                                                                                                |                                                                                                                                | 0.0704 / 0.0288                                                                                                                 | 0.0396 / 0.0744                                                                                                                                             |
| data / restraints / parameters                                                       | 15039 / 587 / 1896                                                                                                             |                                                                                                                                | 27529 / 1404 / 2548                                                                                                             | 20441 / 1724 / 2440                                                                                                                                         |
| Goof on <i>F</i> <sup>2</sup>                                                        | 1.063                                                                                                                          |                                                                                                                                | 1.031                                                                                                                           | 1.013                                                                                                                                                       |
| <i>R</i> <sub>1</sub> / <i>wR</i> <sub>2</sub> [ <i>I</i> ≥ 2 $\sigma$ ( <i>I</i> )] | 0.0349 / 0.0964                                                                                                                |                                                                                                                                | 0.0325 / 0.0786                                                                                                                 | 0.0437 / 0.0814                                                                                                                                             |
| <i>R</i> <sub>1</sub> / <i>wR</i> <sub>2</sub> [all data]                            | 0.0408 / 0.0985                                                                                                                |                                                                                                                                | 0.0436 / 0.0831                                                                                                                 | 0.0721 / 0.0920                                                                                                                                             |
| max / min $\Delta\rho$ [e·Å <sup>-3</sup> ]                                          | 1.851 / -0.738                                                                                                                 |                                                                                                                                | 1.461 / -0.784                                                                                                                  | 1.387 / -1.053                                                                                                                                              |
| identification code                                                                  | LD106_new_abs_error_model_off                                                                                                  | LD202                                                                                                                          | LD461_oP_abs_gaus                                                                                                               | CR500_Moa                                                                                                                                                   |

**Table S2:** Crystallographic details for the compounds **5**, **3b** and **4b**.

|                                                                                      | <b>5</b>                                                                                                                        | <b>3b</b>                                                                                                                                        | <b>4b</b>                                                                                                                                              |
|--------------------------------------------------------------------------------------|---------------------------------------------------------------------------------------------------------------------------------|--------------------------------------------------------------------------------------------------------------------------------------------------|--------------------------------------------------------------------------------------------------------------------------------------------------------|
| formula                                                                              | C <sub>60</sub> H <sub>20</sub> Al <sub>2</sub> Bi <sub>2</sub> F <sub>72</sub> Mo <sub>4</sub> O <sub>16</sub> Sb <sub>2</sub> | C <sub>60</sub> H <sub>20</sub> Al <sub>2</sub> As <sub>2</sub> Cl <sub>24</sub> F <sub>48</sub> Mo <sub>4</sub> O <sub>16</sub> Sb <sub>2</sub> | C <sub>62</sub> H <sub>24</sub> O <sub>16</sub> F <sub>48</sub> Al <sub>2</sub> Cl <sub>28</sub> As <sub>2.07</sub> Mo <sub>4</sub> Bi <sub>1.93</sub> |
| weight [g·mol <sup>-1</sup> ]                                                        | 3463.94                                                                                                                         | 3590.62                                                                                                                                          | 3925.55                                                                                                                                                |
| Temperature [K]                                                                      | 110.0(1)                                                                                                                        | 123.0(1)                                                                                                                                         | 123.0(1)                                                                                                                                               |
| crystal system                                                                       | monoclinic                                                                                                                      | monoclinic                                                                                                                                       | monoclinic                                                                                                                                             |
| space group                                                                          | <i>P</i> 2 <sub>1</sub> / <i>n</i>                                                                                              | <i>P</i> 2 <sub>1</sub> / <i>c</i>                                                                                                               | <i>P</i> 2 <sub>1</sub> / <i>n</i>                                                                                                                     |
| <i>a</i> [Å]                                                                         | 15.58570(10)                                                                                                                    | 20.6398(2)                                                                                                                                       | 13.3028(2)                                                                                                                                             |
| <i>b</i> [Å]                                                                         | 22.6461(2)                                                                                                                      | 23.2138(2)                                                                                                                                       | 27.6708(4)                                                                                                                                             |
| <i>c</i> [Å]                                                                         | 25.9891(2)                                                                                                                      | 23.1270(2)                                                                                                                                       | 14.6789(3)                                                                                                                                             |
| $\alpha$ [°]                                                                         | 90                                                                                                                              | 90                                                                                                                                               | 90                                                                                                                                                     |
| $\beta$ [°]                                                                          | 90.5190(10)                                                                                                                     | 112.9690(10)                                                                                                                                     | 96.234(2)                                                                                                                                              |
| $\gamma$ [°]                                                                         | 90                                                                                                                              | 90                                                                                                                                               | 90                                                                                                                                                     |
| Volume [Å <sup>3</sup> ]                                                             | 9172.61(12)                                                                                                                     | 10202.27(17)                                                                                                                                     | 5371.34(16)                                                                                                                                            |
| <i>Z</i>                                                                             | 4                                                                                                                               | 4                                                                                                                                                | 2                                                                                                                                                      |
| $\rho_{calc}$ [g·cm <sup>-3</sup> ]                                                  | 2.508                                                                                                                           | 2.338                                                                                                                                            | 2.427                                                                                                                                                  |
| $\mu$ [mm <sup>-1</sup> ]                                                            | 13.899                                                                                                                          | 16.089                                                                                                                                           | 5.090                                                                                                                                                  |
| <i>F</i> (000)                                                                       | 6472.0                                                                                                                          | 6840.0                                                                                                                                           | 3709.0                                                                                                                                                 |
| crystal size [mm <sup>3</sup> ]                                                      | 0.373 × 0.109 × 0.086                                                                                                           | 0.275 × 0.122 × 0.11                                                                                                                             | 0.984 × 0.237 × 0.128                                                                                                                                  |
| diffractometer                                                                       | GV50                                                                                                                            | GV50                                                                                                                                             | SuperNova                                                                                                                                              |
| absorption correction                                                                | gaussian                                                                                                                        | gaussian                                                                                                                                         | gaussian                                                                                                                                               |
| <i>T</i> <sub>min</sub> / <i>T</i> <sub>max</sub>                                    | 0.079 / 0.642                                                                                                                   | 0.477 / 0.719                                                                                                                                    | 0.106 / 1.000                                                                                                                                          |
| radiation [Å]                                                                        | Cu-K $\beta$ ( $\lambda$ = 1.39222)                                                                                             | Cu-K $\alpha$ ( $\lambda$ = 1.54184)                                                                                                             | Mo-K $\alpha$ ( $\lambda$ = 0.71073)                                                                                                                   |
| 2 $\theta$ range [°]                                                                 | 4.674 to 148.256                                                                                                                | 7.616 to 148.062                                                                                                                                 | 5.89 to 69.18                                                                                                                                          |
| completeness [%]                                                                     | 99.6                                                                                                                            | 99.6                                                                                                                                             | 99.8                                                                                                                                                   |
| reflns collected / unique                                                            | 84463 / 24730                                                                                                                   | 58041 / 20043                                                                                                                                    | 51984 / 21333                                                                                                                                          |
| <i>R</i> <sub>int</sub> / <i>R</i> <sub>sigma</sub>                                  | 0.0457 / 0.0333                                                                                                                 | 0.0525 / 0.0453                                                                                                                                  | 0.0391 / 0.0513                                                                                                                                        |
| data / restraints / parameters                                                       | 23965 / 656 / 1694                                                                                                              | 18107 / 587 / 1675                                                                                                                               | 18316 / 0 / 743                                                                                                                                        |
| <i>Goof</i> on <i>F</i> <sup>2</sup>                                                 | 1.165                                                                                                                           | 1.033                                                                                                                                            | 1.068                                                                                                                                                  |
| <i>R</i> <sub>1</sub> / <i>wR</i> <sub>2</sub> [ <i>I</i> ≥ 2 $\sigma$ ( <i>I</i> )] | 0.0577 / 0.1524                                                                                                                 | 0.0458 / 0.1181                                                                                                                                  | 0.0378 / 0.0816                                                                                                                                        |
| <i>R</i> <sub>1</sub> / <i>wR</i> <sub>2</sub> [all data]                            | 0.0589 / 0.1531                                                                                                                 | 0.0523 / 0.1233                                                                                                                                  | 0.0484 / 0.0856                                                                                                                                        |
| max / min $\Delta\rho$ [e·Å <sup>-3</sup> ]                                          | 2.412 / -1.793                                                                                                                  | 1.903 / -1.166                                                                                                                                   | 1.920 / -1.979                                                                                                                                         |
| identification code                                                                  | LD364_mP_abs_gaus                                                                                                               | LD196_CR014_abs                                                                                                                                  | LD448_abs                                                                                                                                              |

## Refinement details for 1:

Compound **1** can be regarded as isostructural to compound **2**, **IX** and **X**. It crystallizes in the monoclinic space group  $P2_1/n$  with one dicationic complex exhibiting a central AsPPAs zigzag chain and two independent WCAs [TEF]<sup>-</sup> in the asymmetric unit. The refinement of the cationic part could be performed without any difficulty. For one [TEF]<sup>-</sup> anion (including Al1) a positional disorder for the fragment Al{OC(CF<sub>3</sub>)<sub>3</sub>}<sub>2</sub> is observed with a ratio of 90:10. Due to the low occupancy of the minor part was only the Al11 atom anisotropically refined and the  $U_{iso}$  of the O, C and F atoms was set to 0.3. The other [TEF]<sup>-</sup> anion (including Al2) shows a rotational or positional disorder of the -OC<sub>4</sub>F<sub>9</sub> groups with ratios of 88:12, 86:14, 81:19 and 60:40, respectively. The disordered groups were during the refinement process partially restrained with DFIX, SADI and SIMU commands.

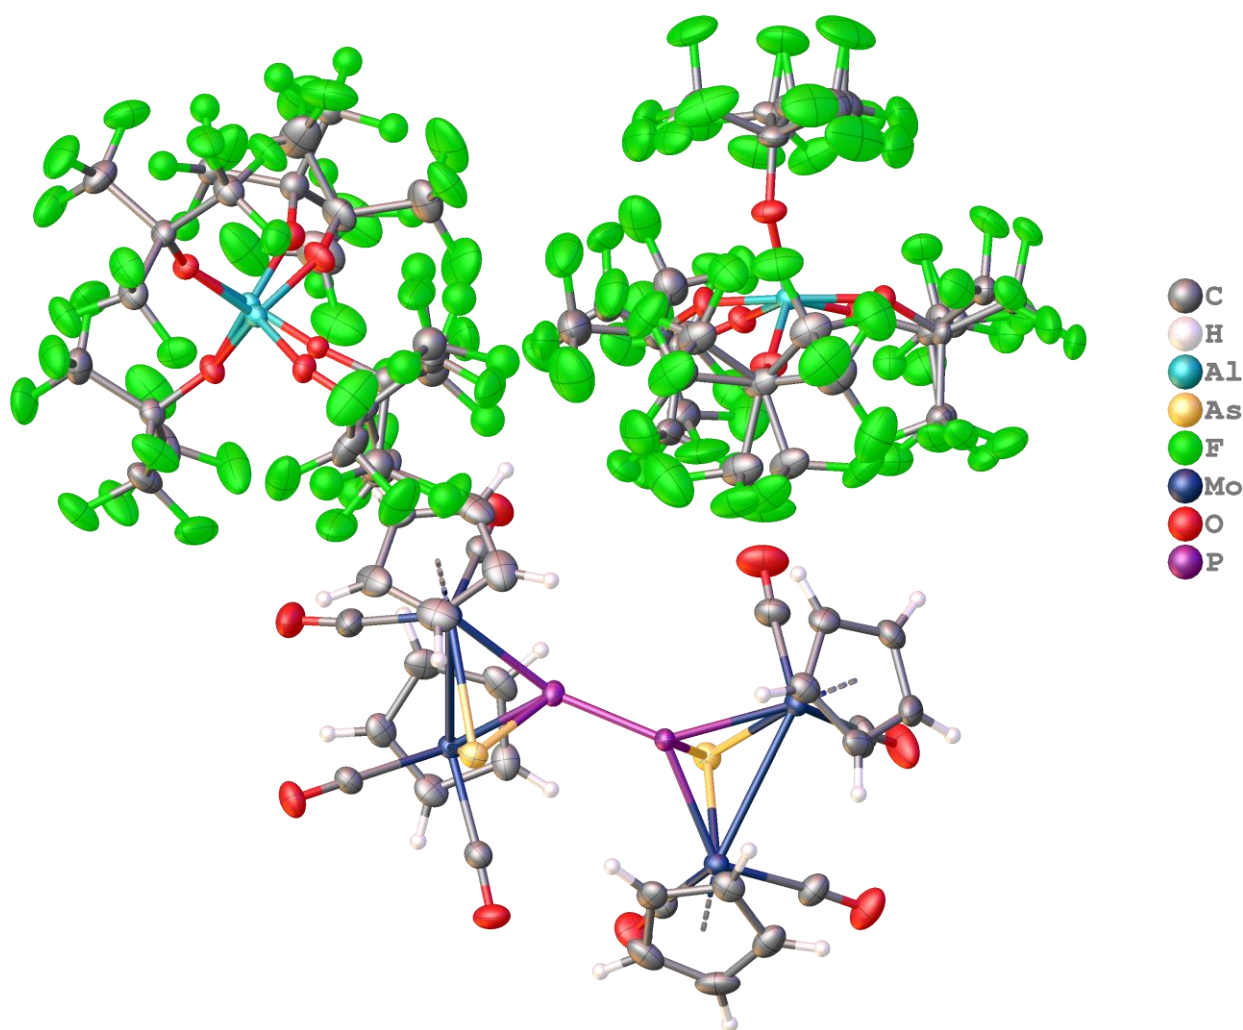

**Figure S60:** Molecular structure of **1**. The asymmetric unit is shown containing one dication and two [TEF]<sup>-</sup> anions, which both show disorder of several -OC(CF<sub>3</sub>)<sub>3</sub> groups.



### Refinement details for **2**:

The X-ray dataset of **2** is very weak and, therefore, a proper refinement of the molecular structure was not possible. Only the heavy atom framework of the dicationic part can be identified, which suggests in combination with the spectroscopical data of **2** (*vide supra*) and the unit cell parameters that **2** also forms a dicationic SbPPSb zigzag chain upon P–P bond formation being isostructural to **1**, **IX** and **X**. The heavy atom framework of **2** is shown in Figure S61.

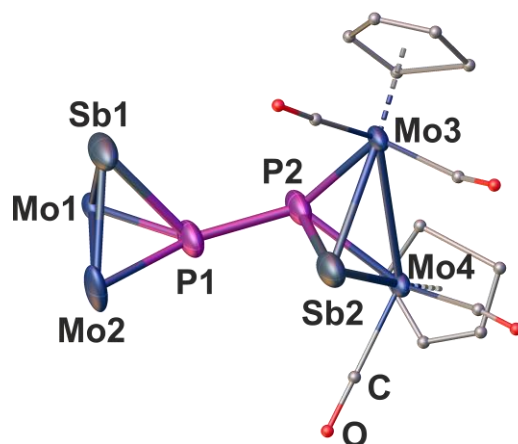

**Figure S61:** Heavy atom framework of the dicationic part of **2**. H atoms as well as the Cp and CO ligands of one Mo<sub>2</sub>PSb unit are omitted for clarity. Additionally, Cp and CO ligands are drawn as small spheres.

### Refinement details for **3a**:

Compound **3a** crystallizes in the orthorhombic space group *Pbca* with one dication exhibiting a central AsSbSbAs chain/cage and two independent WCAs [TEF]<sup>-</sup> in the asymmetric unit. The cationic unit shows a positional disorder of the (Mo<sub>2</sub>AsSb)<sub>2</sub> unit with a ratio of 80:20. For one [TEF]<sup>-</sup> anion (including Al1) a positional disorder for three -OC(CF<sub>3</sub>)<sub>3</sub> groups is observed with a ratio of 60:40, 51:49 and 50:50, respectively. The other [TEF]<sup>-</sup> anion (including Al2) shows a positional disorder of two -OC(CF<sub>3</sub>)<sub>3</sub> groups over two positions with a ratio of 70:30 and of two -OC(CF<sub>3</sub>)<sub>3</sub> group over three positions with ratios of 50:25:25 and 47:29:24, respectively. The disordered groups were, during the refinement process, partially restrained with DFIX, SADI and SIMU commands. An interesting feature of the molecular structure in **3a** is the arrangement of the Cp substituents. While the arrangement at one of the Mo<sub>2</sub>AsSb units resembles the respective arrangement of chain-type structures (see manuscript, Figure 2b Mo<sub>2</sub>AsSb unit), like in **1**, the arrangement at the other Mo<sub>2</sub>AsSb unit is similar to cage-type structures (see manuscript, Figure 2b left Mo<sub>2</sub>AsSb unit), e.g., in **5**. This again shows that the structure of **3a** represents an intermediate stage between the chain-type structures in **1**, **2**, **VI** and **VII**, and the cage-type structures in **5**, **VIII** and **IX**.

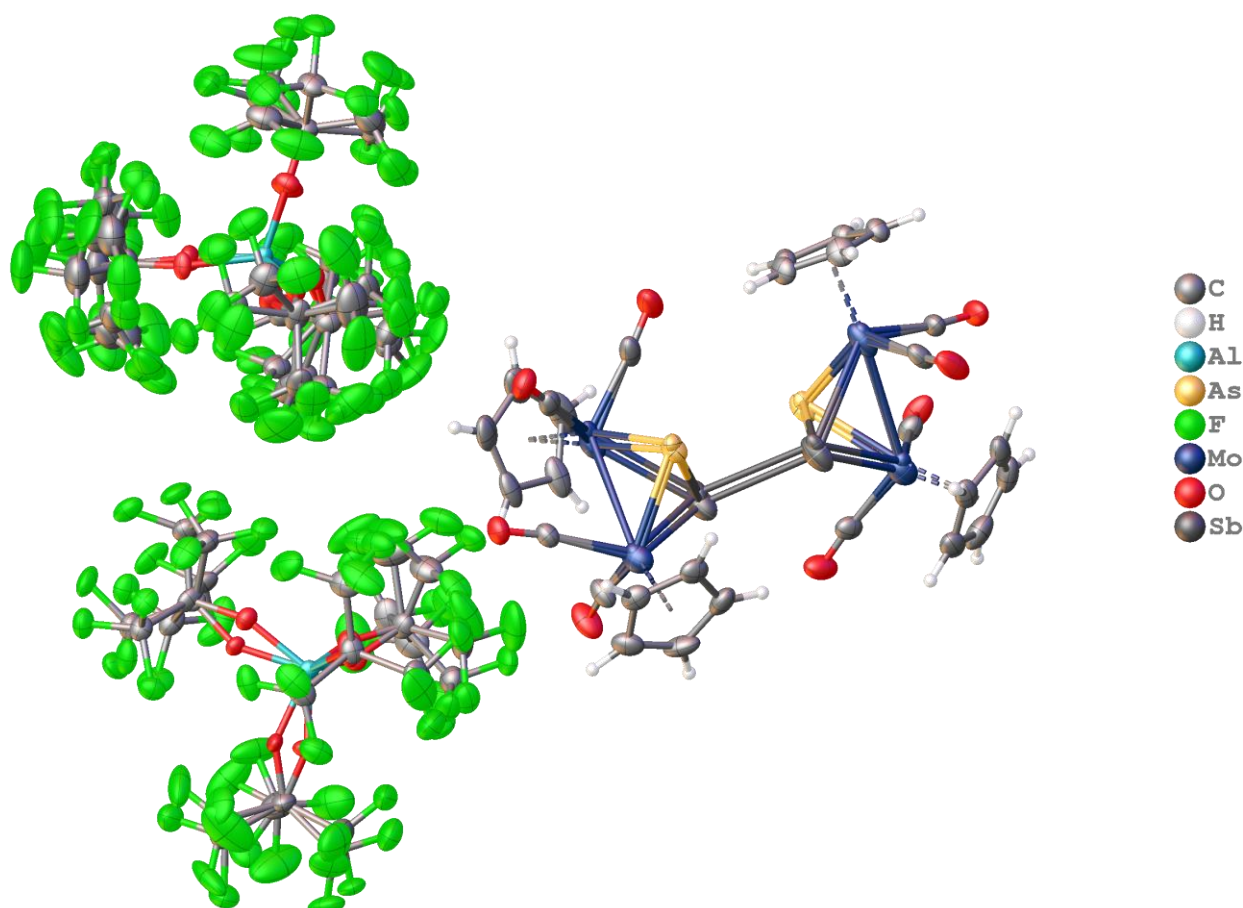

**Figure S62:** Molecular structure of **3a**. The asymmetric unit is shown containing one disordered dication and two disordered [TEF]<sup>-</sup> anions.

### Refinement details for **3b**:

Compound **3b** crystallizes in the monoclinic space group  $P2_1/c$  with one dication exhibiting a central AsSbAsSb cycle and two independent WCAs  $[\text{TEF}^{\text{Cl}}]^-$  in the asymmetric unit. The cationic unit shows a disorder of the  $\text{As}_2\text{Sb}_2$  cycle in a ratio of 84:16. Further shows one of the  $[\text{TEF}^{\text{Cl}}]^-$  anions (including Al1) a rotational and a positional disorder of two  $\text{OC}(\text{CF}_3)_2(\text{CCl}_3)$  groups in a ratio of 85:15. The second  $[\text{TEF}^{\text{Cl}}]^-$  anion (including Al2) shows a disorder of the two oxygen atoms O14 and O15 in ratios of 60:40 and 50:50, respectively. Further is the Cl atom Cl21 disordered over two positions with the ratio 70:30. The disordered groups were, during the refinement process, partially restrained with SADI, ISOR and SIMU commands.

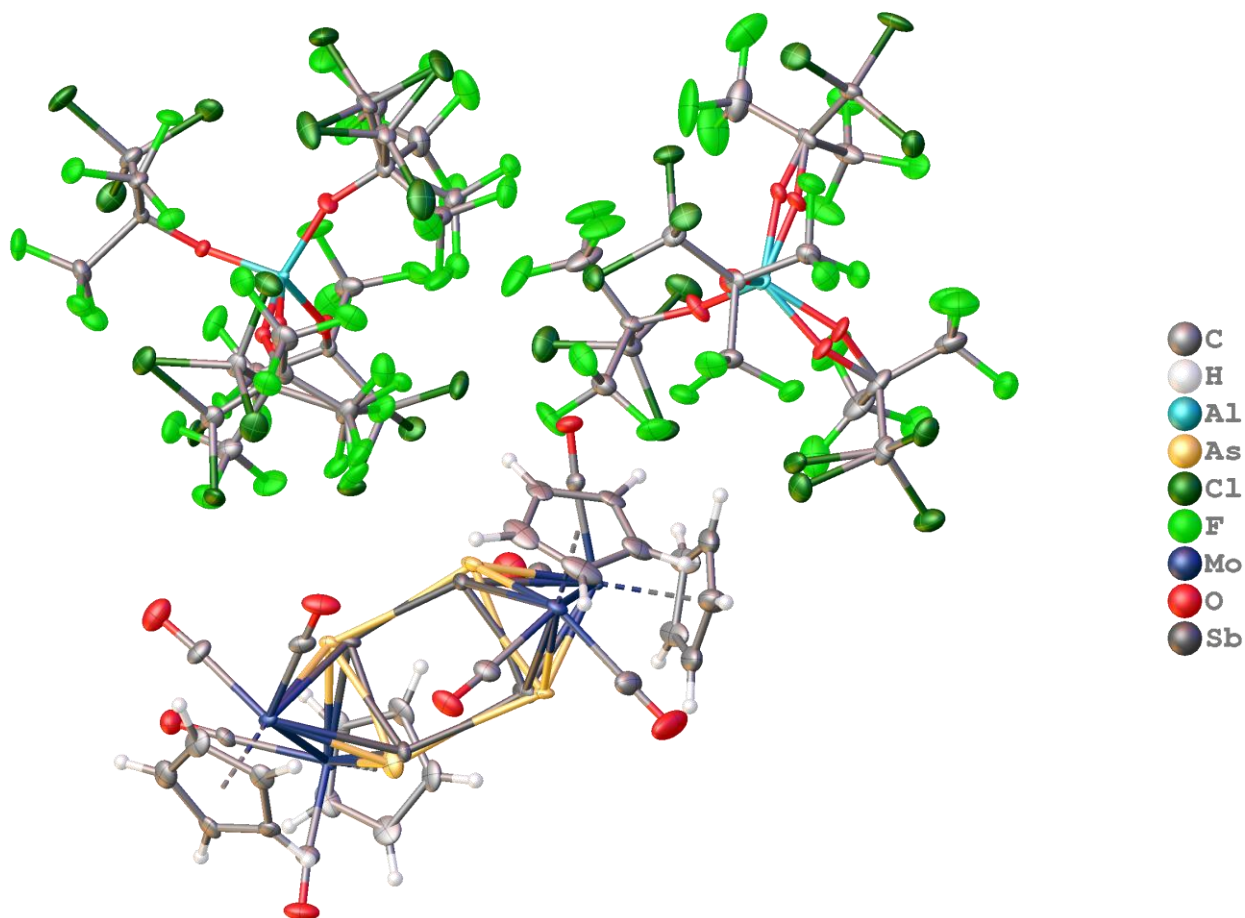

**Figure S63:** Molecular structure of **3b**. The asymmetric unit is shown containing one disordered dication and two disordered  $[\text{TEF}^{\text{Cl}}]^-$  anions.

### Refinement details for 4a:

Compound **4a** crystallizes in the triclinic space group  $P\bar{1}$  with two half dications exhibiting a central AsBiAs ring and two independent WCAs [TEF]<sup>-</sup> as well as 0.1 molecules CH<sub>2</sub>Cl<sub>2</sub> in the asymmetric unit. One of these dications co-crystalizes with the dicationic As<sub>4</sub> chain **X** in a ratio of 88:12. One [TEF]<sup>-</sup> anion (including Al2) shows rotational and positional disorder of all four perfluorinated *tert*-butoxy groups in a ratio of 50:50, 50:50, 63:37 and 58:42. The second [TEF]<sup>-</sup> anion (including Al1) shows also a rotational and positional disorder of all four -OC(CF<sub>3</sub>)<sub>3</sub> groups, whereat three of these groups are disordered over two positions (88:12; 86:14; 74:26) and the third one shows a disorder over three positions (55:31:14). The disordered groups were, during the refinement process, partially restrained with DFIX, SADI and SIMU commands.

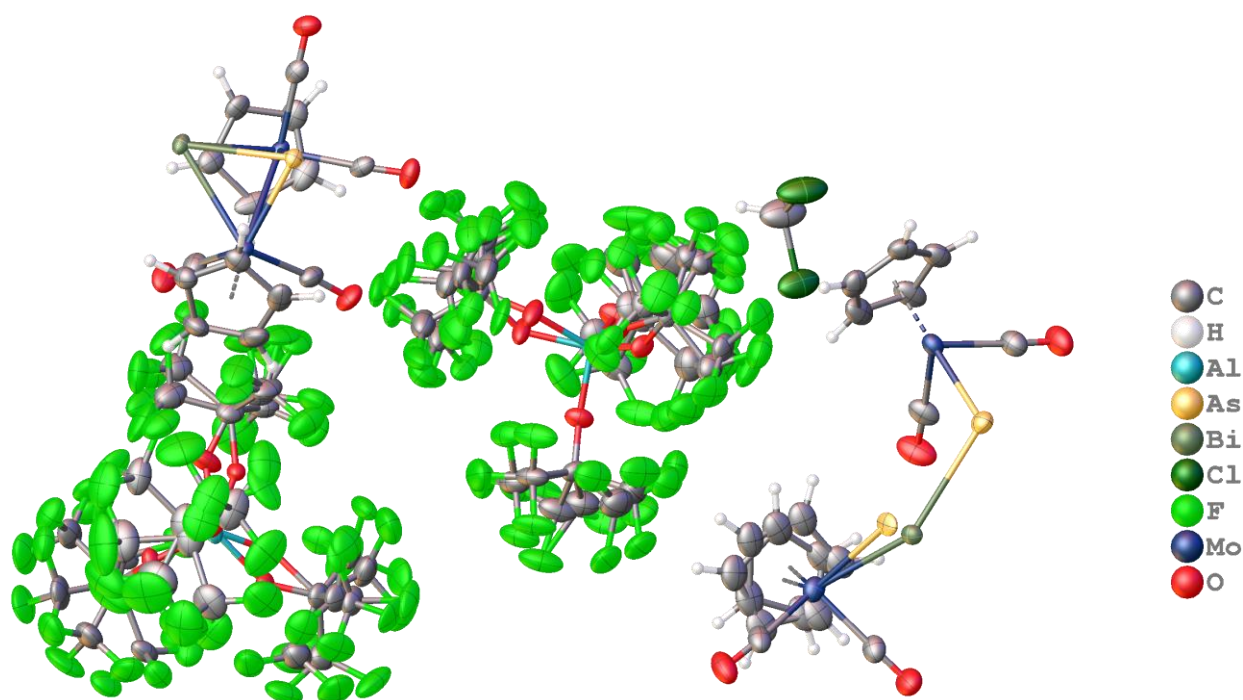

**Figure S64:** Molecular structure of **4a**. The asymmetric unit is shown containing two half molecules of the dication, two disordered [TEF]<sup>-</sup> anions and one solvent molecule CH<sub>2</sub>Cl<sub>2</sub>. One of the dications co-crystalizes with the dicationic As<sub>4</sub> chain **X** in a ratio of 88:12 and exhibits rotational disorder of one of its Cp ligands.

### Refinement details for 4b:

Compound **4b** crystallizes in the monoclinic space group  $P2_1/n$  with one half dication exhibiting a central AsBiBiAs cycle, one WCA  $[\text{TEF}^{\text{Cl}}]^-$  and one solvent molecule  $\text{CH}_2\text{Cl}_2$  in the asymmetric unit. The cyclic dication  $[\{\text{CpMo}(\text{CO})_2\}_2(\mu, \eta^2: \eta^2\text{-BiAs})]_2^{2+}$  co-crystalizes with the dicationic  $\text{As}_4$  chain **X** in a ratio of 97:3. The anion  $[\text{TEF}^{\text{Cl}}]^-$  shows no sign of disorder.

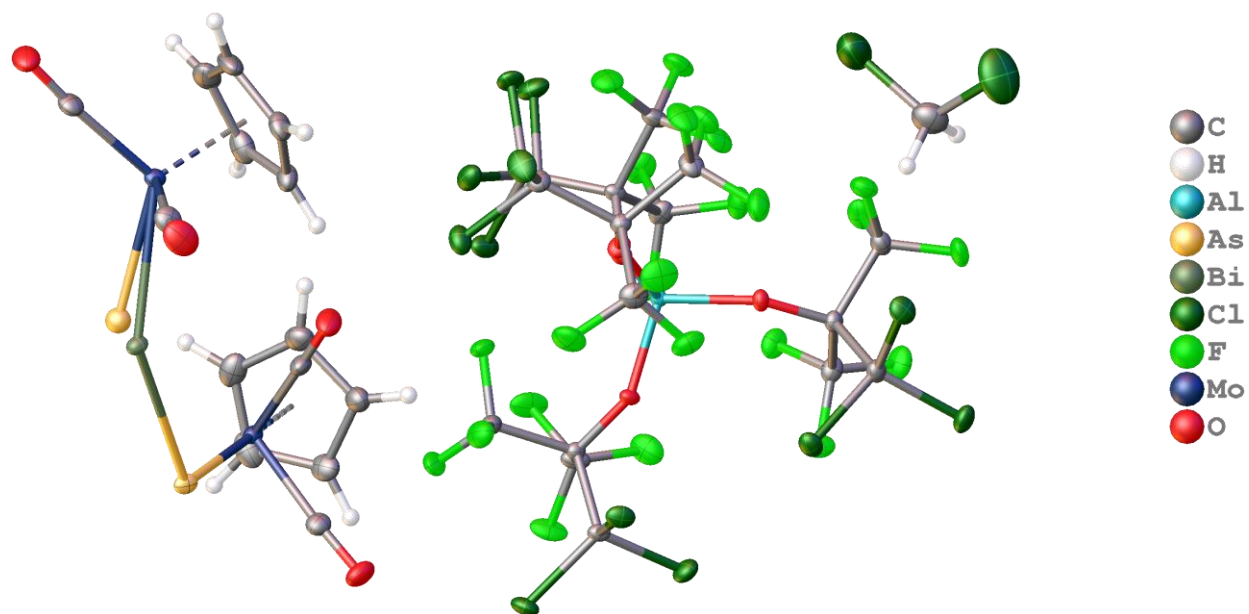

**Figure S65:** Molecular structure of **4b**. The asymmetric unit is shown containing one half dication, one  $[\text{TEF}^{\text{Cl}}]^-$  anion and one solvent molecule  $\text{CH}_2\text{Cl}_2$ . The dication co-crystalizes with the dicationic  $\text{As}_4$  chain **X** in a ratio of 97:3.

### Refinement details for 5:

Compound **5** crystallizes in the monoclinic space group  $P2_1/n$  with one dication exhibiting a central BiSbSbBi cage and two independent WCAs  $[\text{TEF}]^-$  in the asymmetric unit. The dication  $[\{\text{CpMo}(\text{CO})_2\}_2(\mu, \eta^2: \eta^2\text{-BiSb})]_2^{2+}$  features a disorder over two positions of both BiSb dumbbells (76:24) and one Cp ligand (59:41). It could, however, also be a co-crystallization with the dicationic  $\text{Sb}_4$  and/or  $\text{Bi}_4$  cages **XI** and **XII**, respectively, which were also detected in the NMR spectra (*vide supra*). One  $[\text{TEF}]^-$  anion (including Al2) shows rotational disorder of two perfluorinated *tert*-butoxy groups in a ratio of 52:48 and 72:28. The disordered groups were, during the refinement process, partially restrained with SADI and SIMU commands.

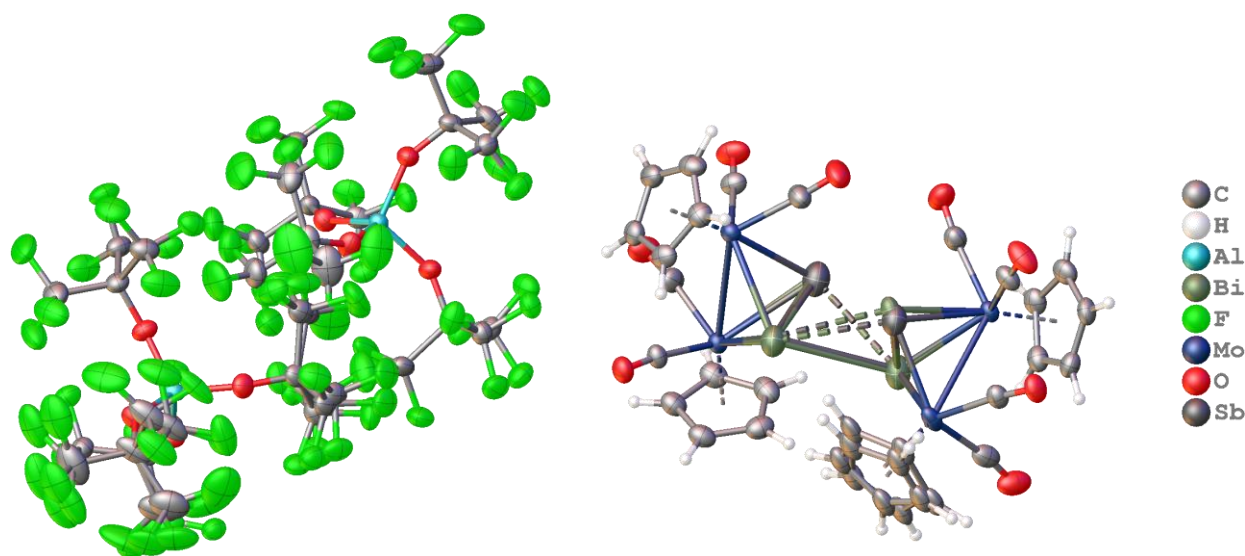

**Figure S66:** Molecular structure of **5**. The asymmetric unit is shown containing one disordered dication and two disordered  $[\text{TEF}]^-$  anions.

## 8 Details of DFT Calculations

The DFT calculations have been performed with the ORCA program.<sup>9</sup> The geometries have been optimised with the TPSSh<sup>10</sup> functional together with the def2-TZVP<sup>11</sup> basis set. The starting point for the geometry optimisations were the coordinates obtained from the X-ray diffractions. To speed up the calculations in a first step the geometries has been optimised at the BP86<sup>12</sup>/def2-SVP level, than at the BP86/def2-TZVP, TPSSh/def2-TZVP (using the RIJCOSX<sup>13</sup> approximation) and finally at the TPSSh/def2-TZVP level (the latter without the RIJCOSX approximation). The dispersion effects have been incorporated by using the charge dependent atom-pairwise dispersion correction model (D4).<sup>14</sup> For the solvent effects has been accounted via the Conductor-like Polarizable Continuum Model (CPCM)<sup>15</sup> as implemented in Orca, using the dielectric constant of dichloromethane. The atomic orbital contribution to the frontier molecular orbitals of compounds **A–E** has been determined at the B3LYP<sup>12a,16</sup>/def2-TZVP level using Loewdin orbital population analysis. For the calculation of the reaction energies, the total SCF energies (TPSSh/def2-TZVP) have been used without further corrections.

**Table S3:** Total SCF energies calculated at the TPSSh/def2-TZVP level.

| Compound                                                                                | Total energy (ha) |
|-----------------------------------------------------------------------------------------|-------------------|
| [(CpMo(CO) <sub>2</sub> ) <sub>2</sub> (PAs)] <sup>+</sup> ( <b>A</b> <sup>+</sup> )    | -3554.59332539731 |
| [(CpMo(CO) <sub>2</sub> ) <sub>2</sub> (PSb)] <sup>+</sup> ( <b>B</b> <sup>+</sup> )    | -1558.95030364644 |
| [(CpMo(CO) <sub>2</sub> ) <sub>2</sub> (PBi)] <sup>+</sup>                              | -1533.35568693966 |
| [(CpMo(CO) <sub>2</sub> ) <sub>2</sub> (AsSb)] <sup>+</sup> ( <b>C</b> <sup>+</sup> )   | -3453.41414884946 |
| [(CpMo(CO) <sub>2</sub> ) <sub>2</sub> (AsBi)] <sup>+</sup> ( <b>D</b> <sup>+</sup> )   | -3427.82007153905 |
| [(CpMo(CO) <sub>2</sub> ) <sub>2</sub> (SbBi)] <sup>+</sup> ( <b>E</b> <sup>+</sup> )   | -1432.18131708391 |
| [(CpMo(CO) <sub>2</sub> ) <sub>2</sub> (PAs)] <sub>2</sub> <sup>2+</sup> ( <b>1</b> )   | -7109.24276961385 |
| [(CpMo(CO) <sub>2</sub> ) <sub>2</sub> (PSb)] <sub>2</sub> <sup>2+</sup> ( <b>2</b> )   | -3117.96089582412 |
| [(CpMo(CO) <sub>2</sub> ) <sub>2</sub> (AsSb)] <sub>2</sub> <sup>2+</sup> ( <b>3a</b> ) | -6906.88267451174 |
| [(CpMo(CO) <sub>2</sub> ) <sub>2</sub> (AsBi)] <sub>2</sub> <sup>2+</sup> ( <b>4a</b> ) | -6855.69504284423 |
| [(CpMo(CO) <sub>2</sub> ) <sub>2</sub> (SbBi)] <sub>2</sub> <sup>2+</sup> ( <b>5</b> )  | -2864.42577128920 |

**Table S4:** Mulliken spin densities calculated at the TPSSH/def2-TZVP level.

| [[CpMo(CO) <sub>2</sub> ] <sub>2</sub> (PAs)] <sup>+</sup> ( <b>A</b> <sup>+</sup> )  |        |         |        |
|---------------------------------------------------------------------------------------|--------|---------|--------|
| 0 As:                                                                                 | 1 P    | 2 Mo:   | 3 Mo:  |
| 0.022                                                                                 | 0.016  | 0.423   | 0.397  |
| [[CpMo(CO) <sub>2</sub> ] <sub>2</sub> (PSb)] <sup>+</sup> ( <b>B</b> <sup>+</sup> )  |        |         |        |
| 0 Sb:                                                                                 | 1 p    | 2 Mo:   | 3 Mo:  |
| 0.157                                                                                 | 0.138  | 0.238   | 0.402  |
| [[CpMo(CO) <sub>2</sub> ] <sub>2</sub> (PBi)] <sup>+</sup>                            |        |         |        |
| 0 Bi:                                                                                 | 1 p    | 2 Mo:   | 3 Mo:  |
| 0.206                                                                                 | 0.155  | 0.211   | 0.370  |
| [[CpMo(CO) <sub>2</sub> ] <sub>2</sub> (AsSb)] <sup>+</sup> ( <b>C</b> <sup>+</sup> ) |        |         |        |
| 0 Sb:                                                                                 | 1 As:  | 2 Mo:   | 3 Mo:  |
| 0.167                                                                                 | 0.154  | 0.254   | 0.367  |
| [[CpMo(CO) <sub>2</sub> ] <sub>2</sub> (AsBi)] <sup>+</sup> ( <b>D</b> <sup>+</sup> ) |        |         |        |
| 0 Bi:                                                                                 | 1 As:  | 2 Mo:   | 3 Mo:  |
| 0.2133                                                                                | 0.1724 | 0.22449 | 0.3381 |
| [[CpMo(CO) <sub>2</sub> ] <sub>2</sub> (SbBi)] <sup>+</sup> ( <b>E</b> <sup>+</sup> ) |        |         |        |
| 0 Bi:                                                                                 | 1 Sb:  | 2 Mo:   | 3 Mo:  |
| 0.257                                                                                 | 0.226  | 0.247   | 0.231  |

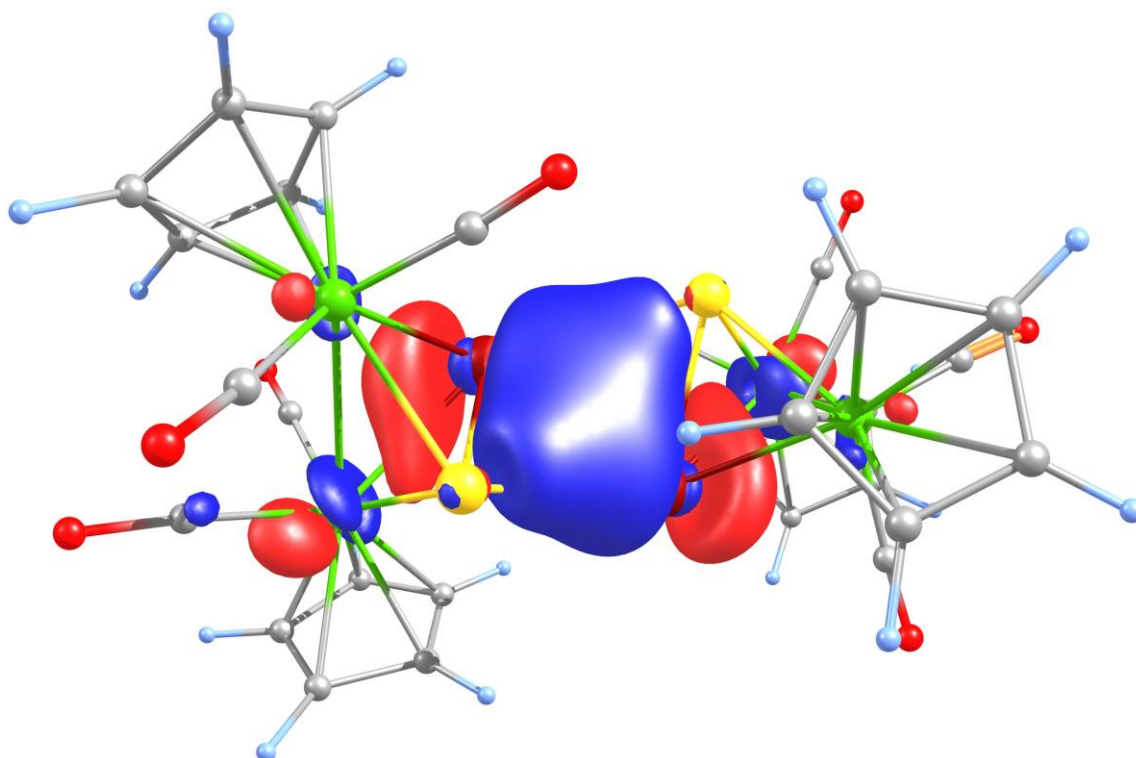

**Figure S67:** Intrinsic bonding orbital<sup>17</sup> representing a 2e4c bond in [[CpMo(CO)<sub>2</sub>]<sub>2</sub>(AsSb)]<sub>2</sub><sup>2+</sup> (**3a**) (TPSSH/def2-TZVP level).



**Table S5:** Cartesian coordinates of the optimised geometry of  $[(\text{CpMo}(\text{CO})_2)_2(\text{PAs})]^+$  ( $\text{A}^+$ ) (TPSSh/def2-TZVP level).

| Atom | X         | Y         | Z         |
|------|-----------|-----------|-----------|
| As   | -0.610966 | -2.460618 | -0.910819 |
| P    | -1.738249 | -1.693525 | 0.839316  |
| Mo   | 0.696782  | -1.060954 | 0.887756  |
| Mo   | -1.269650 | 0.067632  | -0.902140 |
| C    | -0.736118 | 2.029106  | 0.277819  |
| H    | 0.093540  | 2.139065  | 0.955724  |
| C    | -2.868398 | 1.720693  | -0.520259 |
| H    | -3.926207 | 1.510736  | -0.564317 |
| C    | -2.043460 | 2.102696  | -1.619976 |
| H    | -2.369461 | 2.250644  | -2.637558 |
| C    | -0.721155 | 2.298408  | -1.118548 |
| H    | 0.127950  | 2.630745  | -1.695596 |
| C    | -2.064790 | 1.670979  | 0.645800  |
| H    | -2.406099 | 1.417388  | 1.637066  |
| C    | -2.895926 | -0.819607 | -1.669453 |
| C    | -0.311624 | -0.233474 | -2.647801 |
| O    | -3.854636 | -1.264780 | -2.109284 |
| O    | 0.226998  | -0.334750 | -3.656166 |
| C    | 2.141380  | 0.373218  | -0.284312 |
| H    | 1.825427  | 1.140439  | -0.971111 |
| C    | 2.931888  | -1.621741 | 0.538610  |
| H    | 3.279795  | -2.641984 | 0.593749  |
| C    | 2.836340  | -0.709105 | 1.630432  |
| H    | 3.117111  | -0.908581 | 2.652686  |
| C    | 2.348660  | 0.529899  | 1.114140  |
| H    | 2.205649  | 1.435221  | 1.683624  |
| C    | 2.502476  | -0.958189 | -0.638294 |
| H    | 2.470953  | -1.385225 | -1.628248 |
| C    | 0.714301  | -2.901218 | 1.687443  |
| C    | -0.054321 | -0.389476 | 2.633019  |
| O    | 0.784372  | -3.942300 | 2.157768  |
| O    | -0.432561 | 0.008657  | 3.638929  |

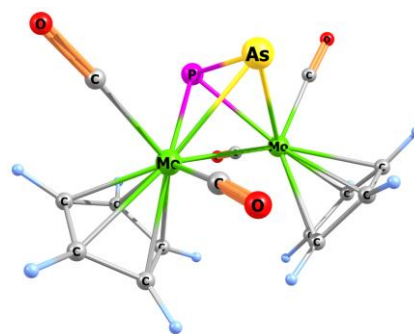

Selected Mayer bond orders larger than 0.100:

B (0-As, 1-P): 1.0872  
B (0-As, 2-Mo): 0.8196  
B (0-As, 3-Mo): 0.8466  
B (1-P, 2-Mo): 0.8847  
B (1-P, 3-Mo): 0.8635  
B (2-Mo, 3-Mo): 0.5894

**Table S6:** Cartesian coordinates of the optimised geometry of  $[(\text{CpMo}(\text{CO})_2)_2(\text{PSb})]^+$  ( $\text{B}^+$ ) (TPSSH/def2-TZVP level).

| Atom      | X         | Y         | Z         |
|-----------|-----------|-----------|-----------|
| <b>Sb</b> | -0.646814 | -2.509003 | -0.993646 |
| <b>P</b>  | -1.626806 | -1.422281 | 1.012484  |
| <b>Mo</b> | 0.854833  | -1.113182 | 0.836797  |
| <b>Mo</b> | -1.467061 | 0.156972  | -0.851129 |
| <b>C</b>  | -1.161050 | 2.203875  | 0.262654  |
| <b>H</b>  | -0.280476 | 2.439496  | 0.837805  |
| <b>C</b>  | -3.276506 | 1.508541  | -0.329638 |
| <b>H</b>  | -4.278372 | 1.110190  | -0.283577 |
| <b>C</b>  | -2.640350 | 2.050167  | -1.490277 |
| <b>H</b>  | -3.077465 | 2.133987  | -2.473282 |
| <b>C</b>  | -1.340505 | 2.478097  | -1.119550 |
| <b>H</b>  | -0.612742 | 2.934229  | -1.772867 |
| <b>C</b>  | -2.362048 | 1.606572  | 0.752508  |
| <b>H</b>  | -2.558429 | 1.315752  | 1.771996  |
| <b>C</b>  | -2.548486 | -0.671885 | -2.317019 |
| <b>C</b>  | 0.046022  | 0.150824  | -2.143744 |
| <b>O</b>  | -3.213157 | -1.052937 | -3.173724 |
| <b>O</b>  | 0.856322  | 0.255282  | -2.958695 |
| <b>C</b>  | 2.521566  | 0.100683  | -0.299167 |
| <b>H</b>  | 2.313923  | 0.957769  | -0.918516 |
| <b>C</b>  | 2.911148  | -2.057677 | 0.402876  |
| <b>H</b>  | 3.059127  | -3.126348 | 0.404599  |
| <b>C</b>  | 3.049345  | -1.187524 | 1.531585  |
| <b>H</b>  | 3.321540  | -1.480579 | 2.533497  |
| <b>C</b>  | 2.809236  | 0.141702  | 1.087087  |
| <b>H</b>  | 2.848071  | 1.030112  | 1.698340  |
| <b>C</b>  | 2.581413  | -1.261010 | -0.727669 |
| <b>H</b>  | 2.460346  | -1.614168 | -1.738826 |
| <b>C</b>  | 0.693822  | -2.591214 | 2.164300  |
| <b>C</b>  | 0.203045  | 0.121053  | 2.255930  |
| <b>O</b>  | 0.657216  | -3.442667 | 2.931845  |
| <b>O</b>  | -0.096709 | 0.835168  | 3.107023  |

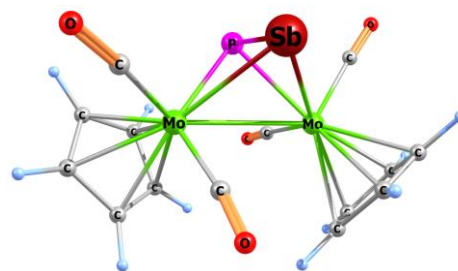

Selected Mayer bond orders larger than 0.100:

B (0-Sb, 1-P): 0.9265  
 B (0-Sb, 2-Mo): 0.8113  
 B (0-Sb, 3-Mo): 0.8238  
 B (1-P, 2-Mo): 0.9512  
 B (1-P, 3-Mo): 0.9418  
 B (2-Mo, 3-Mo): 0.3914

**Table S7:** Cartesian coordinates of the optimised geometry of  $[(\text{CpMo}(\text{CO})_2)_2(\text{PBi})]^+$  (TPSSh/def2-TZVP level).

| Atom      | X             | Y             | Z             |
|-----------|---------------|---------------|---------------|
| <b>Bi</b> | -0.6625821684 | -2.6088159753 | -1.0549283193 |
| <b>P</b>  | -1.6344873557 | -1.4073746242 | 1.0215391258  |
| <b>Mo</b> | 0.8428148269  | -1.1220357636 | 0.8376144827  |
| <b>Mo</b> | -1.4699544041 | 0.1455159764  | -0.8582134695 |
| <b>C</b>  | -1.1215365194 | 2.1757054784  | 0.2801934741  |
| <b>H</b>  | -0.2442382035 | 2.3820982409  | 0.8715215283  |
| <b>C</b>  | -3.2452086110 | 1.5427336373  | -0.3503658572 |
| <b>H</b>  | -4.2592149573 | 1.1748957993  | -0.3209682220 |
| <b>C</b>  | -2.5762029141 | 2.0738774695  | -1.4977752498 |
| <b>H</b>  | -2.9954029745 | 2.1774480669  | -2.4866242779 |
| <b>C</b>  | -1.2708829568 | 2.4631442473  | -1.1028905341 |
| <b>H</b>  | -0.5201973874 | 2.9037411824  | -1.7407270964 |
| <b>C</b>  | -2.3456105654 | 1.6090268054  | 0.7465628145  |
| <b>H</b>  | -2.5646312463 | 1.3174937319  | 1.7612614626  |
| <b>C</b>  | -2.6078876151 | -0.6730147803 | -2.2834782462 |
| <b>C</b>  | 0.0244885311  | 0.1023473750  | -2.1689436117 |
| <b>O</b>  | -3.3143641889 | -1.0350166834 | -3.1169998697 |
| <b>O</b>  | 0.8281959907  | 0.2006131624  | -2.9936759461 |
| <b>C</b>  | 2.4805287441  | 0.1214283875  | -0.3178486991 |
| <b>H</b>  | 2.2548170629  | 0.9576198774  | -0.9589511004 |
| <b>C</b>  | 2.9300713278  | -2.0070762320 | 0.4361244980  |
| <b>H</b>  | 3.1135013730  | -3.0699284406 | 0.4618031866  |
| <b>C</b>  | 3.0261564444  | -1.1101259098 | 1.5481214801  |
| <b>H</b>  | 3.2983184297  | -1.3726273276 | 2.5583544235  |
| <b>C</b>  | 2.7474832059  | 0.2018435535  | 1.0704583190  |
| <b>H</b>  | 2.7525478230  | 1.1049685071  | 1.6610751851  |
| <b>C</b>  | 2.5876807787  | -1.2459933456 | -0.7154449886 |
| <b>H</b>  | 2.4941225920  | -1.6230447344 | -1.7209923125 |
| <b>C</b>  | 0.6987606708  | -2.6478808255 | 2.1081456943  |
| <b>C</b>  | 0.1869409770  | 0.0525583583  | 2.2994442962  |
| <b>O</b>  | 0.6776055727  | -3.5223044011 | 2.8513561623  |
| <b>O</b>  | -0.1116317826 | 0.7381791862  | 3.1752512674  |

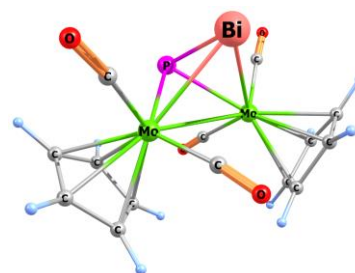

Selected Mayer bond orders larger than 0.100:

B (0-Bi, 1-P): 0.8614  
 B (0-Bi, 2-Mo): 0.7541  
 B (0-Bi, 3-Mo): 0.7880  
 B (0-Bi, 14-C): 0.1081  
 B (1-P, 2-Mo): 0.9677  
 B (1-P, 3-Mo): 0.9641  
 B (2-Mo, 3-Mo): 0.3897  
 B (2-Mo, 18-C): 0.4194  
 B (2-Mo, 20-C): 0.4489

**Table S8:** Cartesian coordinates of the optimised geometry of  $[(\text{CpMo}(\text{CO})_2)_2(\text{AsSb})]^+$  ( $\text{C}^*$ ) (TPSSH/def2-TZVP level).

| Atom | X             | Y             | Z            |
|------|---------------|---------------|--------------|
| Sb   | -0.5965984758 | -2.4985963828 | -1.047114392 |
| As   | -1.7203446200 | -1.5105099222 | 1.0668385865 |
| Mo   | 0.8604917699  | -1.1386282867 | 0.8467724823 |
| Mo   | -1.4665777622 | 0.15705897227 | -0.854185626 |
| C    | -1.1528209513 | 2.18939214070 | 0.2899482750 |
| H    | -0.2869097942 | 2.40613413804 | 0.8939309479 |
| C    | -3.2597377772 | 1.53259859517 | -0.371902626 |
| H    | -4.2708059913 | 1.15591929732 | -0.357322829 |
| C    | -2.5792911580 | 2.07022466465 | -1.509812818 |
| H    | -2.9852043589 | 2.17189179943 | -2.504339469 |
| C    | -1.2837880194 | 2.47382123271 | -1.094497453 |
| H    | -0.5289867275 | 2.92444073876 | -1.720285291 |
| C    | -2.3771120138 | 1.60757574758 | 0.7391791170 |
| H    | -2.6111144269 | 1.32325868896 | 1.7526869818 |
| C    | -2.6068874325 | -0.6705884353 | -2.271143252 |
| C    | 0.01473362742 | 0.14437855337 | -2.179186702 |
| O    | -3.3101129688 | -1.0548157818 | -3.095208818 |
| O    | 0.81557675288 | 0.24899236551 | -3.004108688 |
| C    | 2.49203482232 | 0.10597687296 | -0.307902221 |
| H    | 2.26384902534 | 0.95438318298 | -0.931852657 |
| C    | 2.93424093958 | -2.0382944923 | 0.4060514957 |
| H    | 3.10577605642 | -3.1034195077 | 0.4138772187 |
| C    | 3.05646570746 | -1.1584614030 | 1.5287467361 |
| H    | 3.33818801562 | -1.4396818753 | 2.5313816838 |
| C    | 2.78355936659 | 0.16189239967 | 1.0773380372 |
| H    | 2.80411710629 | 1.05512925541 | 1.6824651602 |
| C    | 2.58211868274 | -1.2564293173 | -0.728141998 |
| H    | 2.47002376955 | -1.6178016998 | -1.737552594 |
| C    | 0.72594049025 | -2.6192988822 | 2.1741847272 |
| C    | 0.18314048065 | 0.08764881021 | 2.2573215909 |
| O    | 0.71977977429 | -3.4695914524 | 2.9452735209 |
| O    | -0.1137441088 | 0.80539958361 | 3.1085609799 |

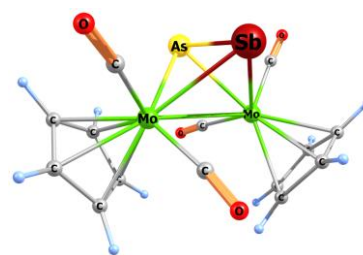

Selected Mayer bond orders larger than 0.100:

B (O-Sb, 1-As): 0.9199

B (O-Sb, 2-Mo): 0.8233

B (O-Sb, 3-Mo): 0.8456

B (1-As, 2-Mo): 0.9303

B (1-As, 3-Mo): 0.9291

B (2-Mo, 3-Mo): 0.3867

**Table S9:** Cartesian coordinates of the optimised geometry of  $[(\text{CpMo}(\text{CO})_2)_2(\text{AsBi})]^+$  ( $\text{D}^+$ ) (TPSSH/def2-TZVP level).

| Atom | X            | Y            | Z            |
|------|--------------|--------------|--------------|
| Bi   | -0.603918104 | -2.589742324 | -1.107583134 |
| As   | -1.722326723 | -1.493966333 | 1.0754222756 |
| Mo   | 0.8560047290 | -1.141906417 | 0.8488453333 |
| Mo   | -1.469296421 | 0.1516338376 | -0.859932278 |
| C    | -1.130392082 | 2.1778337404 | 0.2895818031 |
| H    | -0.262195599 | 2.3827208417 | 0.8944445642 |
| C    | -3.245142473 | 1.5481278930 | -0.373761792 |
| H    | -4.261235278 | 1.1853715877 | -0.358769715 |
| C    | -2.557687975 | 2.0778526871 | -1.511259598 |
| H    | -2.962054522 | 2.1857565486 | -2.505699547 |
| C    | -1.257258219 | 2.4648177160 | -1.094902483 |
| H    | -0.496750891 | 2.9065686003 | -1.720139267 |
| C    | -2.361984823 | 1.6114948180 | 0.7375567709 |
| H    | -2.599716564 | 1.3295323643 | 1.7509272469 |
| C    | -2.638550828 | -0.671481249 | -2.251630111 |
| C    | 0.0065030683 | 0.1217215086 | -2.187642270 |
| O    | -3.367329542 | -1.037762964 | -3.064310170 |
| O    | 0.8063888107 | 0.2321203226 | -3.015353276 |
| C    | 2.4745275071 | 0.1161577182 | -0.314757703 |
| H    | 2.2390836685 | 0.9538718243 | -0.950081052 |
| C    | 2.9436232771 | -2.013251790 | 0.4267731745 |
| H    | 3.1323589457 | -3.075294567 | 0.4466910979 |
| C    | 3.0445012377 | -1.120201693 | 1.5408416521 |
| H    | 3.3249944344 | -1.385609029 | 2.5480420005 |
| C    | 2.7537527271 | 0.1914336276 | 1.0718795617 |
| H    | 2.7588689409 | 1.0919486914 | 1.6664825819 |
| C    | 2.5877915111 | -1.248885966 | -0.719053963 |
| H    | 2.4932938289 | -1.620865370 | -1.726441167 |
| C    | 0.7229971655 | -2.647213218 | 2.1445075938 |
| C    | 0.1800667500 | 0.0584352312 | 2.2784829458 |
| O    | 0.7231864748 | -3.510398078 | 2.9026360970 |
| O    | -0.112103223 | 0.7691790457 | 3.1382029348 |

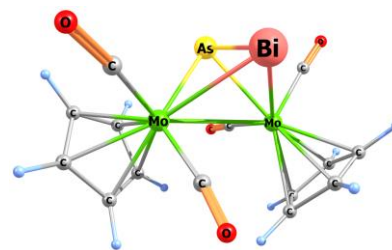

Selected Mayer bond orders larger than 0.100:

B (0-Bi, 1-As): 0.8587  
B (0-Bi, 2-Mo): 0.7675  
B (0-Bi, 3-Mo): 0.8031  
B (1-As, 2-Mo): 0.9447  
B (1-As, 3-Mo): 0.9533  
B (2-Mo, 3-Mo): 0.3837

**Table S10:** Cartesian coordinates of the optimised geometry of  $[(\text{CpMo}(\text{CO})_2)_2(\text{SbBi})]^+$  ( $\text{E}^+$ ) (TPSSH/def2-TZVP level).

| Atom | X         | Y        | Z        |
|------|-----------|----------|----------|
| Bi   | 0.442370  | 5.922866 | 7.856550 |
| Sb   | 1.502950  | 5.823532 | 5.190276 |
| Mo   | -0.481483 | 4.043711 | 5.858225 |
| Mo   | 2.446205  | 4.041462 | 7.137506 |
| O    | -1.265329 | 2.819391 | 8.633455 |
| O    | -2.864302 | 6.069579 | 6.101510 |
| C    | -0.915092 | 3.328204 | 7.654623 |
| C    | -1.949739 | 5.368853 | 6.064337 |
| O    | 3.265132  | 2.818340 | 4.373432 |
| O    | 4.807131  | 6.087872 | 6.869914 |
| C    | 2.906828  | 3.321731 | 5.350780 |
| C    | 3.902366  | 5.376883 | 6.923360 |
| C    | 1.882128  | 2.129192 | 8.393628 |
| H    | 1.010716  | 1.523835 | 8.206782 |
| C    | 3.160723  | 1.931421 | 7.814368 |
| H    | 3.420541  | 1.159235 | 7.106848 |
| C    | 4.045553  | 2.913208 | 8.338159 |
| H    | 5.095447  | 3.006570 | 8.108777 |
| C    | 3.304350  | 3.725944 | 9.252236 |
| H    | 3.697926  | 4.543511 | 9.835940 |
| C    | 1.966434  | 3.241724 | 9.284936 |
| H    | 1.179021  | 3.595693 | 9.930958 |
| C    | 0.086532  | 2.118151 | 4.629259 |
| H    | 0.949502  | 1.507809 | 4.838768 |
| C    | -1.205516 | 1.934681 | 5.184531 |
| H    | -1.484529 | 1.171941 | 5.894956 |
| C    | -2.070915 | 2.918437 | 4.635249 |
| H    | -3.123708 | 3.023879 | 4.845715 |
| C    | -1.306166 | 3.717637 | 3.728497 |
| H    | -1.680964 | 4.534462 | 3.131552 |
| C    | 0.027277  | 3.222841 | 3.726041 |
| H    | 0.831212  | 3.571607 | 3.097631 |

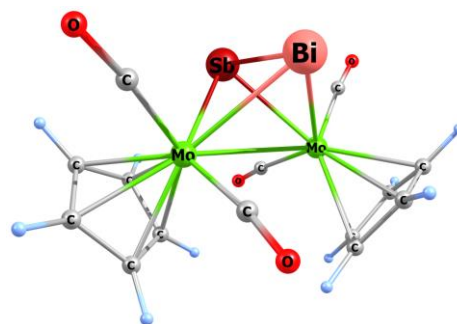

Selected Mayer bond orders larger than 0.100:

B (0-Bi, 1-Sb): 0.8384

B (0-Bi, 2-Mo): 0.8133

B (0-Bi, 3-Mo): 0.7789

B (1-Sb, 2-Mo): 0.8574

B (1-Sb, 3-Mo): 0.8735

B (2-Mo, 3-Mo): 0.3761

**Table S11:** Cartesian coordinates of the optimised geometry of  $[(\text{CpMo}(\text{CO})_2)_2(\text{PAs})]_2^{2+}$  (**1**) (TPSSH/def2-TZVP level).

| Atom | X            | Y           | Z            |
|------|--------------|-------------|--------------|
| Mo   | 14.252187352 | 4.366093139 | 33.879736289 |
| Mo   | 12.719242027 | 1.673549128 | 33.423942471 |
| Mo   | 11.032047162 | 3.240545620 | 28.431425382 |
| Mo   | 12.332175263 | 6.115833348 | 28.691846086 |
| As   | 11.648135636 | 3.974739134 | 34.097143512 |
| P    | 12.686417117 | 3.741846276 | 32.142838214 |
| P    | 11.606853263 | 4.533892131 | 30.400086307 |
| As   | 13.435361153 | 3.831699419 | 29.131267425 |
| O    | 14.840631237 | 7.080647437 | 30.297906410 |
| O    | 14.993249815 | 0.950344458 | 31.380525909 |
| C    | 14.196707505 | 1.245460857 | 32.154963587 |
| O    | 12.453558923 | 3.218794140 | 25.614419886 |
| O    | 14.278376463 | 5.706785768 | 26.246252726 |
| C    | 11.972606298 | 3.245096831 | 26.652778292 |
| C    | 13.939620136 | 6.679553527 | 29.711953417 |
| C    | 16.380610944 | 3.936293870 | 34.671673883 |
| H    | 16.559534856 | 3.533863530 | 35.656611996 |
| C    | 16.048519505 | 4.081486951 | 32.397461962 |
| H    | 15.931075430 | 3.812291913 | 31.359458812 |
| O    | 12.359467696 | 0.473980854 | 29.064902079 |
| C    | 10.341617694 | 7.256227417 | 29.124026513 |
| H    | 9.6108203526 | 6.912545199 | 29.839277948 |
| C    | 13.565593311 | 5.807980763 | 27.137671485 |
| O    | 13.597906929 | 4.412470114 | 36.965347128 |
| C    | 16.261809797 | 3.181323852 | 33.474921664 |
| H    | 16.343097318 | 2.109432260 | 33.404327807 |
| C    | 11.920959779 | 1.513075639 | 28.843442420 |
| C    | 9.1528092841 | 3.620955807 | 27.151152084 |
| H    | 9.1862893398 | 4.169072364 | 26.222431980 |
| C    | 11.451045297 | 8.097754412 | 29.422259401 |
| H    | 11.693673271 | 8.509372138 | 30.389421282 |
| C    | 8.8716308984 | 3.082920717 | 29.372183296 |
| H    | 8.6729191068 | 3.169262695 | 30.428972048 |
| O    | 14.727282166 | 1.272457942 | 35.797546820 |
| C    | 10.351605100 | 6.985164490 | 27.727457695 |
| H    | 9.6272392324 | 6.414802891 | 27.171521191 |
| C    | 16.272688230 | 5.319233772 | 34.335559325 |
| H    | 16.365719467 | 6.150302361 | 35.016808424 |
| C    | 16.059570232 | 5.404150824 | 32.923385074 |

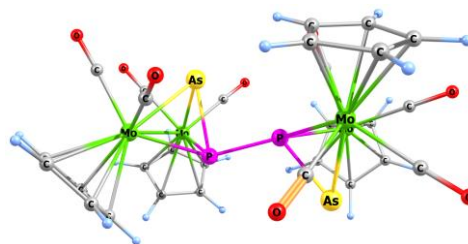



|   |              |             |              |
|---|--------------|-------------|--------------|
| H | 15.967224006 | 6.314935220 | 32.354976615 |
| C | 9.1603366819 | 1.885069952 | 28.670287433 |
| H | 9.2138725133 | 0.895163347 | 29.096558991 |
| C | 9.3319018200 | 2.207789470 | 27.292808116 |
| H | 9.5271744592 | 1.505549816 | 26.497588745 |
| C | 14.023937848 | 1.525540285 | 34.916120622 |
| C | 13.551649248 | 6.234159164 | 33.818338328 |
| C | 8.8690024394 | 4.154784001 | 28.437865348 |
| H | 8.6301552173 | 5.177635656 | 28.671785366 |
| C | 12.206782558 | -0.51555587 | 33.779131134 |
| H | 12.964776272 | -1.24955723 | 34.002723729 |
| C | 11.469377660 | 7.649105654 | 27.161166068 |
| H | 11.739957005 | 7.644303237 | 26.116475650 |
| C | 13.791157340 | 4.378517967 | 35.835359879 |
| C | 10.697359498 | 0.793683139 | 32.631002834 |
| H | 10.132625782 | 1.252921725 | 31.835055486 |
| C | 11.730437106 | -0.17005007 | 32.477336597 |
| H | 12.070329330 | -0.59505810 | 31.546265192 |
| C | 12.152884708 | 8.344545731 | 28.199562327 |
| H | 13.022133983 | 8.971660146 | 28.077515774 |
| O | 13.203219062 | 7.324472412 | 33.760787150 |
| C | 10.522262618 | 1.043252717 | 34.021699648 |
| H | 9.7773984137 | 1.688366719 | 34.459436060 |
| C | 11.459784626 | 0.247125972 | 34.732303111 |
| H | 11.561305190 | 0.198034940 | 35.805041535 |

Selected Mayer bond orders larger than 0.100:

|                         |                         |                        |
|-------------------------|-------------------------|------------------------|
| B (0-Mo, 1-Mo): 0.4639; | B (0-Mo, 4-As): 0.9126; | B (0-Mo, 5-P): 0.7025  |
| B (0-Mo, 15-C): 0.4683; | B (0-Mo, 17-C): 0.4385; | B (0-Mo, 23-O): 0.1064 |
| B (0-Mo, 24-C): 0.4137; | B (0-Mo, 36-C): 0.4923; | B (0-Mo, 38-C): 0.4706 |
| B (0-Mo, 44-C): 0.1611; | B (0-Mo, 45-C): 1.1261; | B (0-Mo, 52-C): 1.1123 |
| B (0-Mo, 59-O): 0.1049; | B (1-Mo, 4-As): 0.7679; | B (1-Mo, 5-P): 0.7405  |
| B (1-Mo, 9-O): 0.1056;  | B (1-Mo, 10-C): 1.1022; | B (1-Mo, 33-O): 0.1029 |
| B (1-Mo, 44-C): 1.1495; | B (1-Mo, 48-C): 0.5140; | B (1-Mo, 53-C): 0.4387 |
| B (1-Mo, 55-C): 0.4196; | B (1-Mo, 60-C): 0.3806; | B (1-Mo, 62-C): 0.4601 |
| B (2-Mo, 3-Mo): 0.3970; | B (2-Mo, 6-P): 0.6984;  | B (2-Mo, 7-As): 0.8701 |
| B (2-Mo, 13-C): 1.0731; | B (2-Mo, 19-O): 0.1111; | B (2-Mo, 26-C): 1.1755 |
| B (2-Mo, 27-C): 0.4806; | B (2-Mo, 31-C): 0.4223; | B (2-Mo, 40-C): 0.4536 |
| B (2-Mo, 42-C): 0.4787; | B (2-Mo, 46-C): 0.4246; | B (3-Mo, 6-P): 0.7604  |
| B (3-Mo, 7-As): 0.8495; | B (3-Mo, 8-O): 0.1037;  | B (3-Mo, 12-O): 0.1001 |
| B (3-Mo, 14-C): 1.1852; | B (3-Mo, 20-C): 0.4461; | B (3-Mo, 22-C): 1.0967 |
| B (3-Mo, 29-C): 0.4651; | B (3-Mo, 34-C): 0.4056; | B (3-Mo, 50-C): 0.4380 |
| B (3-Mo, 57-C): 0.5006; | B (4-As, 5-P): 0.9632;  | B (5-P, 6-P): 0.7926   |
| B (6-P, 7-As): 0.9394;  | B (8-O, 14-C): 2.2029;  | B (9-O, 10-C): 2.1706  |



**Table S12:** Cartesian coordinates of the optimised geometry of  $[(\text{CpMo}(\text{CO})_2)_2(\text{PSb})]_2^{2+}$  (**2**) (TPSSH/def2-TZVP level).

| Atom | X            | Y            | Z            |
|------|--------------|--------------|--------------|
| Mo   | 13.573928448 | 4.5505328779 | 34.167699904 |
| Mo   | 12.683932903 | 1.5897439346 | 33.521561451 |
| Mo   | 10.690541879 | 3.2835820213 | 28.505503938 |
| Mo   | 12.683251444 | 5.7582498316 | 28.598355424 |
| Sb   | 10.883815427 | 3.6670270672 | 34.180975307 |
| P    | 12.362527993 | 3.6452456575 | 32.251522740 |
| P    | 11.550433041 | 4.5340636369 | 30.408769058 |
| Sb   | 13.352255202 | 3.1620569334 | 29.235635676 |
| O    | 15.376165273 | 6.2271448764 | 30.116661493 |
| O    | 15.423291225 | 1.3698062795 | 32.013795986 |
| C    | 14.440049360 | 1.5038718778 | 32.598430277 |
| O    | 11.923475756 | 3.0302270455 | 25.615075668 |
| O    | 14.444388051 | 4.7968410382 | 26.176380179 |
| C    | 11.534868092 | 3.1360944867 | 26.688814600 |
| C    | 14.388965612 | 5.9945741463 | 29.574757891 |
| C    | 15.611935393 | 4.6110738282 | 35.276534940 |
| H    | 15.717003034 | 4.3188371311 | 36.309914992 |
| C    | 15.591228722 | 4.5366992050 | 32.975974185 |
| H    | 15.689558510 | 4.1816036000 | 31.963285754 |
| O    | 11.293588911 | 0.2539417214 | 28.978105140 |
| C    | 11.024567093 | 7.3701224568 | 28.969306617 |
| H    | 10.251261628 | 7.2595512624 | 29.713087725 |
| C    | 13.788211223 | 5.0788664146 | 27.076771120 |
| O    | 12.591968797 | 4.5806266082 | 37.155513621 |
| C    | 15.813181710 | 3.7707893034 | 34.153267425 |
| H    | 16.105927003 | 2.7350024351 | 34.195471332 |
| C    | 11.154955773 | 1.3908353051 | 28.832698444 |
| C    | 8.8834853425 | 4.0348700157 | 27.279692557 |
| H    | 8.9929641197 | 4.5133248275 | 26.318754382 |
| C    | 12.308724058 | 7.9387540496 | 29.196057895 |
| H    | 12.668374687 | 8.3452384566 | 30.128362538 |
| C    | 8.6065040818 | 3.6897222937 | 29.539397200 |
| H    | 8.4881937876 | 3.8689713488 | 30.596441974 |
| O    | 14.209905194 | 1.5933386901 | 36.265569588 |
| C    | 10.933668921 | 7.0074189612 | 27.596841392 |
| H    | 10.078365598 | 6.5912184758 | 27.092753902 |
| C    | 15.286604063 | 5.9165945667 | 34.801560813 |
| H    | 15.118198978 | 6.7912670882 | 35.409841500 |
| C    | 15.274133229 | 5.8654243327 | 33.371107381 |

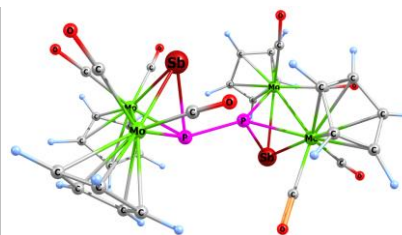

|   |              |              |              |
|---|--------------|--------------|--------------|
| H | 15.096505755 | 6.6996153978 | 32.712122861 |
| C | 8.5752454060 | 2.4240770669 | 28.901867001 |
| H | 8.4220178193 | 1.4729493792 | 29.387649823 |
| C | 8.7431779241 | 2.6280831716 | 27.499731140 |
| H | 8.7298207670 | 1.8611581500 | 26.741248408 |
| C | 13.663233520 | 1.6964506600 | 35.252873607 |
| C | 12.562848310 | 6.2452258277 | 33.913150636 |
| C | 8.7996009812 | 4.6844942988 | 28.539559644 |
| H | 8.8217750510 | 5.7457660559 | 28.718057338 |
| C | 12.624472235 | -0.682958717 | 33.589129617 |
| H | 13.497932988 | -1.271521730 | 33.821267169 |
| C | 12.162147433 | 7.3450615849 | 26.973543864 |
| H | 12.396535415 | 7.2064394337 | 25.929334080 |
| C | 12.875681748 | 4.5256440313 | 36.040499639 |
| C | 10.976616540 | 0.4282192970 | 32.419154563 |
| H | 10.394137272 | 0.8577427752 | 31.620281855 |
| C | 12.205557090 | -0.272128648 | 32.282512386 |
| H | 12.711690541 | -0.495617654 | 31.356814863 |
| C | 13.017988189 | 7.9262021695 | 27.952710408 |
| H | 14.007262890 | 8.3192497744 | 27.778256167 |
| O | 12.049073153 | 7.2588805817 | 33.747764033 |
| C | 10.623127704 | 0.4486310746 | 33.799082346 |
| H | 9.7046688485 | 0.8337462754 | 34.212425359 |
| C | 11.646563128 | -0.222672644 | 34.520846146 |
| H | 11.662079663 | -0.384559448 | 35.587381343 |

Selected Mayer bond orders larger than 0.100:

|                        |                        |                        |
|------------------------|------------------------|------------------------|
| B (0-Mo, 1-Mo): 0.4478 | B (0-Mo, 4-Sb): 0.8107 | B (0-Mo, 5-P): 0.7395  |
| B (0-Mo, 15-C): 0.4550 | B (0-Mo, 17-C): 0.4455 | B (0-Mo, 23-O): 0.1247 |
| B (0-Mo, 24-C): 0.4070 | B (0-Mo, 36-C): 0.4779 | B (0-Mo, 38-C): 0.4686 |
| B (0-Mo, 44-C): 0.1478 | B (0-Mo, 45-C): 1.1633 | B (0-Mo, 52-C): 1.1713 |
| B (0-Mo, 59-O): 0.1121 | B (1-Mo, 4-Sb): 0.7059 | B (1-Mo, 5-P): 0.7256  |
| B (1-Mo, 9-O): 0.1079  | B (1-Mo, 10-C): 1.1350 | B (1-Mo, 33-O): 0.1008 |
| B (1-Mo, 44-C): 1.1210 | B (1-Mo, 48-C): 0.4983 | B (1-Mo, 53-C): 0.4303 |
| B (1-Mo, 55-C): 0.4561 | B (1-Mo, 60-C): 0.3844 | B (1-Mo, 62-C): 0.4600 |
| B (2-Mo, 3-Mo): 0.3905 | B (2-Mo, 6-P): 0.7275  | B (2-Mo, 7-Sb): 0.7968 |
| B (2-Mo, 11-O): 0.1035 | B (2-Mo, 13-C): 1.1107 | B (2-Mo, 19-O): 0.1287 |
| B (2-Mo, 26-C): 1.2287 | B (2-Mo, 27-C): 0.4660 | B (2-Mo, 31-C): 0.4157 |
| B (2-Mo, 34-C): 0.1064 | B (2-Mo, 40-C): 0.4500 | B (2-Mo, 42-C): 0.4836 |
| B (2-Mo, 46-C): 0.4375 | B (3-Mo, 6-P): 0.7250  | B (3-Mo, 7-Sb): 0.8156 |
| B (3-Mo, 8-O): 0.1114  | B (3-Mo, 12-O): 0.1128 | B (3-Mo, 14-C): 1.2217 |
| B (3-Mo, 20-C): 0.4344 | B (3-Mo, 22-C): 1.1425 | B (3-Mo, 29-C): 0.4641 |
| B (3-Mo, 34-C): 0.4157 | B (3-Mo, 50-C): 0.4261 | B (3-Mo, 57-C): 0.5000 |
| B (4-Sb, 5-P): 0.8695  | B (4-Sb, 52-C): 0.1474 | B (4-Sb, 60-C): 0.1551 |
| B (5-P, 6-P): 0.8140   | B (5-P, 7-Sb): 0.1198  | B (6-P, 7-Sb): 0.8336  |

**Table S13:** Cartesian coordinates of the optimised geometry of  $[(\text{CpMo}(\text{CO})_2)_2(\text{AsSb})]_2^{2+}$  (**3a/b**) (TPSSH/def2-TZVP level).

| Atom | X           | Y            | Z           |
|------|-------------|--------------|-------------|
| Mo   | 6.142986837 | 13.593613669 | 16.09400084 |
| Mo   | 3.134279550 | 12.718727674 | 16.21814789 |
| Mo   | 3.038399406 | 18.872109769 | 13.51493045 |
| Mo   | 1.741117505 | 18.786169551 | 16.38179660 |
| Sb   | 4.081148353 | 14.771770445 | 14.59044227 |
| As   | 4.176988947 | 14.767681157 | 17.28475449 |
| Sb   | 4.173303120 | 17.606953815 | 15.74219033 |
| As   | 1.816967434 | 16.941798080 | 14.57916041 |
| O    | 4.721976566 | 21.197887760 | 14.78278281 |
| O    | 0.539853495 | 20.777054312 | 13.41121452 |
| O    | -1.17240653 | 18.622999863 | 15.21235078 |
| O    | 3.780242452 | 11.260408574 | 13.51677478 |
| O    | 6.581531159 | 12.996093726 | 19.14887194 |
| O    | 1.009523569 | 16.329680696 | 18.17344438 |
| C    | 4.322233534 | 11.410080650 | 17.14068003 |
| O    | 4.869163946 | 10.554648196 | 17.68864477 |
| C    | 3.100060992 | 20.341702195 | 17.47725051 |
| C    | 3.610827422 | 11.820939888 | 14.50892720 |
| C    | 2.184920523 | 21.090340955 | 16.68177128 |
| H    | 2.436924978 | 21.772473461 | 15.88692131 |
| C    | 7.772332633 | 13.621797642 | 14.48248257 |
| H    | 8.093210077 | 14.535282259 | 14.00664054 |
| C    | 1.281323211 | 17.197374580 | 17.47241805 |
| C    | 4.063043521 | 20.339461125 | 14.38695237 |
| C    | 6.765172676 | 12.736814935 | 14.00225961 |
| H    | 6.199866656 | 12.854797101 | 13.09138498 |
| C    | 1.429949023 | 20.054253297 | 13.52584477 |
| C    | 7.644779489 | 11.828380365 | 15.92686138 |
| H    | 7.836525739 | 11.152810388 | 16.74627155 |
| C    | -0.08838960 | 18.657465889 | 15.58718389 |
| C    | 2.346182588 | 19.605511906 | 18.43523311 |
| H    | 2.751741457 | 18.973359500 | 19.20965729 |
| O    | 7.370515419 | 16.420407057 | 16.64400808 |
| C    | 8.323206162 | 13.057809371 | 15.67854981 |
| H    | 9.131802674 | 13.466075895 | 16.26402730 |
| C    | 2.528174614 | 18.558519050 | 11.29028144 |
| H    | 1.518900016 | 18.628840204 | 10.91565163 |
| C    | 6.695182489 | 11.629374916 | 14.89406546 |

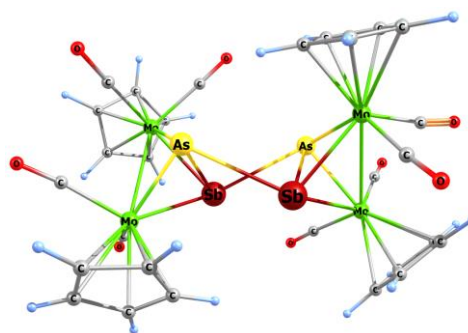

|   |             |              |             |
|---|-------------|--------------|-------------|
| H | 6.049514598 | 10.772247860 | 14.79662792 |
| C | 0.872361831 | 20.812744526 | 17.13552223 |
| C | 0.959798585 | 19.896770708 | 18.22363809 |
| H | 0.132528697 | 19.524706648 | 18.80727655 |
| C | 6.888417844 | 15.393446217 | 16.46435654 |
| C | 3.176201842 | 17.367315264 | 11.71884874 |
| H | 2.747604235 | 16.377491926 | 11.70983941 |
| C | 1.334598858 | 13.198604515 | 17.66552212 |
| H | 1.389146366 | 13.866015981 | 18.50919492 |
| C | 3.462167458 | 19.636309544 | 11.40371387 |
| H | 3.287073035 | 20.663156108 | 11.12362602 |
| C | 4.682340849 | 19.099720534 | 11.91059809 |
| H | 5.591629103 | 19.650888935 | 12.09373118 |
| C | 4.505865555 | 17.703193958 | 12.10261311 |
| H | 5.258574853 | 17.016637648 | 12.45870720 |
| C | 6.362105922 | 13.220897088 | 18.04532378 |
| C | 1.595166250 | 11.803283452 | 17.69484850 |
| H | 1.893517264 | 11.237783019 | 18.56407132 |
| C | 1.367423675 | 11.275443850 | 16.39012863 |
| H | 1.450597233 | 10.239585466 | 16.10063463 |
| C | 0.954916705 | 13.542631273 | 16.33725268 |
| H | 0.686534336 | 14.526404218 | 15.98541929 |
| C | 0.973853877 | 12.360131906 | 15.54581663 |
| H | 0.701284475 | 12.290557684 | 14.50437207 |
| H | -0.03552323 | 21.240218612 | 16.73825460 |
| H | 4.176058423 | 20.375473403 | 17.41025577 |

Selected Mayer bond orders larger than 0.100

|                        |                        |                        |
|------------------------|------------------------|------------------------|
| B (0-Mo, 1-Mo): 0.4179 | B(0-Mo, 4-Sb): 0.6313  | B(0-Mo, 5-As): 0.9770  |
| B (0-Mo, 12-O): 0.1104 | B (0-Mo, 14-C): 0.1529 | B (0-Mo, 20-C): 0.4710 |
| B (0-Mo, 24-C): 0.4433 | B (0-Mo, 27-C): 0.4422 | B (0-Mo, 32-O): 0.1020 |
| B (0-Mo, 33-C): 0.4902 | B (0-Mo, 37-C): 0.4249 | B (0-Mo, 42-C): 1.1453 |
| B (0-Mo, 53-C): 1.1299 | B (1-Mo, 4-Sb): 0.7173 | B (1-Mo, 5-As): 0.8696 |
| B (1-Mo, 11-O): 0.1132 | B (1-Mo, 14-C): 1.1338 | B (1-Mo, 17-C): 1.1708 |
| B (1-Mo, 45-C): 0.3930 | B (1-Mo, 54-C): 0.4391 | B (1-Mo, 56-C): 0.5086 |
| B (1-Mo, 58-C): 0.4320 | B (1-Mo, 60-C): 0.4435 | B (2-Mo, 3-Mo): 0.4229 |
| B (2-Mo, 6-Sb): 0.6956 | B (2-Mo, 7-As): 0.9153 | B (2-Mo, 8-O): 0.1082  |
| B (2-Mo, 23-C): 1.1452 | B (2-Mo, 26-C): 1.1408 | B (2-Mo, 35-C): 0.4523 |
| B (2-Mo, 43-C): 0.4016 | B (2-Mo, 47-C): 0.5084 | B (2-Mo, 49-C): 0.4394 |
| B (2-Mo, 51-C): 0.4049 | B (3-Mo, 6-Sb): 0.6826 | B (3-Mo, 7-As): 0.9160 |
| B (3-Mo, 10-O): 0.1147 | B (3-Mo, 13-O): 0.1000 | B (3-Mo, 16-C): 0.4521 |
| B (3-Mo, 18-C): 0.4323 | B (3-Mo, 22-C): 1.1602 | B (3-Mo, 26-C): 0.1146 |
| B (3-Mo, 29-C): 1.1252 | B (3-Mo, 30-C): 0.4650 | B (3-Mo, 39-C): 0.4374 |
| B (3-Mo, 40-C): 0.4915 | B (4-Sb, 5-As): 0.6726 | B (4-Sb, 6-Sb): 0.5246 |
| B (4-Sb, 7-As): 0.2447 | B (5-As, 6-Sb): 0.2145 | B (6-Sb, 7-As): 0.6481 |

**Table S14:** Cartesian coordinates of the optimised geometry of  $[(\text{CpMo}(\text{CO})_2)_2(\text{AsBi})]_2^{2+}$  (**4a/b**) (TPSSh/def2-TZVP level).

| Atom | X           | Y           | Z           |
|------|-------------|-------------|-------------|
| Bi   | 9.881866893 | -0.24595191 | 9.997197629 |
| Mo   | 12.34781796 | 1.217599458 | 9.543526603 |
| Mo   | 10.51625159 | 0.147943673 | 7.222442932 |
| As   | 10.20246271 | 2.229827168 | 8.711089346 |
| O    | 11.09961397 | 2.613309664 | 5.365623435 |
| O    | 13.28469276 | -1.77690408 | 9.645966329 |
| O    | 13.92028485 | 1.600930318 | 6.853415141 |
| C    | 10.89739102 | 1.750819717 | 6.096423749 |
| C    | 12.88945273 | -0.69754867 | 9.548134303 |
| C    | 12.33028744 | 3.116769464 | 10.92539412 |
| H    | 11.57521483 | 3.887043716 | 10.90648262 |
| C    | 13.27098109 | 1.431333850 | 7.791828329 |
| C    | 9.876578363 | -1.93250054 | 6.500640218 |
| H    | 8.888623226 | -2.32675033 | 6.680463888 |
| C    | 11.01976138 | -2.13693751 | 7.325249459 |
| H    | 11.05342359 | -2.73165159 | 8.224546573 |
| C    | 12.34494710 | 1.971398933 | 11.77138723 |
| H    | 11.59296917 | 1.703759010 | 12.49773174 |
| C    | 13.52164382 | 3.105689602 | 10.14882569 |
| H    | 13.81406903 | 3.855552443 | 9.430515449 |
| C    | 12.13001684 | -1.50122162 | 6.697608403 |
| H    | 13.14746880 | -1.49628766 | 7.051859393 |
| C    | 11.67743951 | -0.89668367 | 5.499740217 |
| H    | 12.28982754 | -0.35111686 | 4.798294624 |
| C    | 14.28059353 | 1.951151221 | 10.51905148 |
| H    | 15.25044369 | 1.676389323 | 10.13518089 |
| C    | 10.28242361 | -1.16071194 | 5.364773461 |
| H    | 9.658605447 | -0.86779799 | 4.535090108 |
| C    | 13.54431030 | 1.251741387 | 11.51910252 |
| H    | 13.85283391 | 0.346812531 | 12.01910838 |
| O    | 7.475382534 | 0.636665206 | 6.684579540 |
| C    | 8.591299040 | 0.501699342 | 6.921821807 |
| Bi   | 8.459919146 | 2.337259885 | 11.37800336 |
| Mo   | 5.799337324 | 2.812055038 | 10.41483753 |
| Mo   | 6.399326901 | 0.824082994 | 12.76396327 |
| As   | 6.724311141 | 0.468325697 | 10.22403468 |
| O    | 4.112803749 | -1.16158179 | 11.93012118 |
| O    | 6.205285464 | 5.002717880 | 12.62247780 |
| O    | 3.096677061 | 2.019820965 | 11.79956248 |

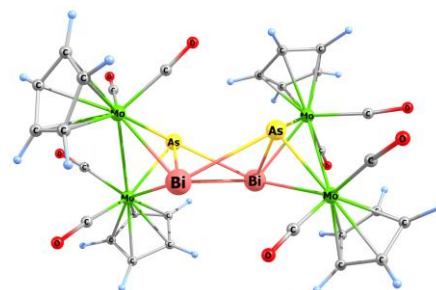

|   |             |             |             |
|---|-------------|-------------|-------------|
| C | 4.950790786 | -0.41574889 | 12.17394334 |
| C | 6.078710926 | 4.143235132 | 11.86332314 |
| C | 5.378295177 | 2.575976149 | 8.107020486 |
| H | 5.368872301 | 1.635823090 | 7.581618099 |
| C | 4.140267125 | 2.235588885 | 11.35545968 |
| C | 7.278189201 | 1.012068236 | 14.87234202 |
| H | 8.275713145 | 0.678644763 | 15.11252752 |
| C | 6.909330730 | 2.332718224 | 14.48549445 |
| H | 7.574200865 | 3.178422725 | 14.40467819 |
| C | 6.498442025 | 3.438089504 | 8.280294360 |
| H | 7.500161797 | 3.262081393 | 7.920632880 |
| C | 4.256573814 | 3.193749475 | 8.719748838 |
| H | 3.255717474 | 2.791265881 | 8.749113683 |
| C | 5.494770779 | 2.359737115 | 14.32181898 |
| H | 4.899537798 | 3.218753381 | 14.05935007 |
| C | 4.989908434 | 1.064095504 | 14.59310662 |
| H | 3.951008972 | 0.773419566 | 14.56509921 |
| C | 4.671506626 | 4.442991197 | 9.263758243 |
| H | 4.038986656 | 5.157856985 | 9.766369858 |
| C | 6.086552357 | 0.221180255 | 14.94237600 |
| H | 6.022392290 | -0.81225426 | 15.24434464 |
| C | 6.067573131 | 4.591835174 | 8.994396342 |
| H | 6.678309388 | 5.443393730 | 9.250598100 |
| O | 8.318747206 | -1.64634956 | 12.76044870 |
| C | 7.612001777 | -0.73952591 | 12.71994048 |

Selected Mayer bond orders larger than 0.100:

|                          |                          |                          |
|--------------------------|--------------------------|--------------------------|
| B (0-Bi, 1-Mo): 0.6362   | B (0-Bi, 2-Mo): 0.6487   | B (0-Bi, 3-As): 0.5781   |
| B (0-Bi, 32-Bi): 0.4243  | B (0-Bi, 35-As): 0.2528  | B (1-Mo, 2-Mo): 0.4266   |
| B (1-Mo, 3-As): 0.9562   | B (1-Mo, 5-O): 0.1099    | B (1-Mo, 8-C): 1.1449    |
| B (1-Mo, 9-C): 0.3956    | B (1-Mo, 11-C): 1.1541   | B (1-Mo, 16-C): 0.4100   |
| B (1-Mo, 18-C): 0.4487   | B (1-Mo, 24-C): 0.4985   | B (1-Mo, 28-C): 0.4308   |
| B (2-Mo, 3-As): 0.9279   | B (2-Mo, 4-O): 0.1197    | B (2-Mo, 7-C): 1.1412    |
| B (2-Mo, 11-C): 0.1223   | B (2-Mo, 12-C): 0.4646   | B (2-Mo, 14-C): 0.4524   |
| B (2-Mo, 20-C): 0.4275   | B (2-Mo, 22-C): 0.4397   | B (2-Mo, 26-C): 0.4860   |
| B (2-Mo, 30-O): 0.1009   | B (2-Mo, 31-C): 1.1651   | B (3-As, 32-Bi): 0.2583  |
| B (4-O, 7-C): 2.2021     | B (5-O, 8-C): 2.1529     | B (6-O, 11-C): 2.1628    |
| B (9-C, 10-H): 0.9541    | B (9-C, 16-C): 1.1391    | B (9-C, 18-C): 1.1960    |
| B (2-C, 13-H): 0.9451    | B (12-C, 14-C): 1.1330   | B (12-C, 26-C): 1.0903   |
| B (14-C, 15-H): 0.9654   | B (14-C, 20-C): 1.1149   | B (16-C, 17-H): 0.9564   |
| B (16-C, 28-C): 1.1768   | B (18-C, 19-H): 0.9370   | B (18-C, 24-C): 1.1200   |
| B (20-C, 21-H): 0.9522   | B (20-C, 22-C): 1.1983   | B (22-C, 23-H): 0.9351   |
| B (22-C, 26-C): 1.1431   | B (24-C, 25-H): 0.9427   | B (24-C, 28-C): 1.1780   |
| B (26-C, 27-H): 0.9466   | B (28-C, 29-H): 0.9378   | B (30-O, 31-C): 2.1823   |
| B (32-Bi, 33-Mo): 0.6822 | B (32-Bi, 34-Mo): 0.5968 | B (32-Bi, 35-As): 0.5872 |
| B (33-Mo, 34-Mo): 0.4243 | B (33-Mo, 35-As): 0.9175 | B (33-Mo, 37-O): 0.1159  |
| B (33-Mo, 40-C): 1.1766  | B (33-Mo, 41-C): 0.3908  | B (33-Mo, 43-C): 1.1372  |
| B (33-Mo, 48-C): 0.4356  | B (33-Mo, 50-C): 0.4398  | B (33-Mo, 56-C): 0.4936  |
| B (33-Mo, 60-C): 0.4423  | B (34-Mo, 35-As): 0.9741 | B (34-Mo, 36-O): 0.1140  |

**Table S15:** Cartesian coordinates of the optimised geometry of  $[(\text{CpMo}(\text{CO})_2)_2(\text{SbBi})]_2^{2+}$  (5) (TPSSH/def2-TZVP level).

| Atom | X           | Y           | Z            |
|------|-------------|-------------|--------------|
| Mo   | 12.43764954 | 1.920669270 | 16.087072078 |
| Mo   | 9.365691405 | 2.760065882 | 15.807595321 |
| Mo   | 11.77827166 | 7.969998648 | 12.929527995 |
| Mo   | 13.08195055 | 8.511228604 | 15.798543996 |
| Sb   | 11.43386581 | 3.800094698 | 14.281253808 |
| Bi   | 11.26099019 | 4.286874049 | 17.232507149 |
| Sb   | 10.89778746 | 6.845918024 | 15.304447108 |
| Bi   | 13.59077128 | 6.194783758 | 14.162508455 |
| O    | 12.38364563 | 1.467828160 | 19.191437506 |
| O    | 9.426527704 | 0.653646808 | 13.489976645 |
| O    | 9.548367102 | 0.424491379 | 17.893231706 |
| O    | 14.00854580 | 10.14783309 | 12.576959514 |
| O    | 16.03234589 | 8.793023260 | 14.766701692 |
| O    | 14.10416076 | 6.454817007 | 17.916362963 |
| O    | 14.95396385 | 3.728114430 | 16.488608848 |
| O    | 9.798381999 | 10.20511124 | 13.873376014 |
| C    | 10.57223640 | 9.392072873 | 13.607169422 |
| C    | 13.53915546 | 10.73214762 | 16.319098161 |
| H    | 14.38140841 | 11.26396802 | 15.904047850 |
| C    | 13.54778441 | 9.950150807 | 17.509955158 |
| H    | 14.39229214 | 9.799455747 | 18.163652203 |
| C    | 12.34410014 | 1.699960624 | 18.063614394 |
| C    | 9.492411602 | 1.410810992 | 14.357732768 |
| C    | 9.592070647 | 1.288962343 | 17.127878932 |
| C    | 13.22525123 | 9.330872870 | 12.808287230 |
| C    | 14.93625369 | 8.630433598 | 15.081672444 |
| C    | 13.74132357 | 7.162474258 | 17.081362458 |
| C    | 13.98396939 | 3.116732728 | 16.368261895 |
| C    | 12.22351616 | 9.443947276 | 17.706213588 |
| H    | 11.88966245 | 8.842955917 | 18.537504800 |
| C    | 11.41044398 | 9.916204271 | 16.636289415 |
| H    | 10.34974089 | 9.752602979 | 16.529483184 |
| C    | 12.22724016 | 10.71749757 | 15.786436443 |
| H    | 11.91017112 | 11.24277392 | 14.900875190 |
| C    | 11.94883947 | -0.19925718 | 15.155335748 |
| H    | 10.96340636 | -0.63170742 | 15.105571430 |
| C    | 12.85840061 | -0.36266020 | 16.228136923 |
| H    | 12.67632848 | -0.93195104 | 17.126625955 |
| C    | 14.06219611 | 0.327204403 | 15.903265056 |

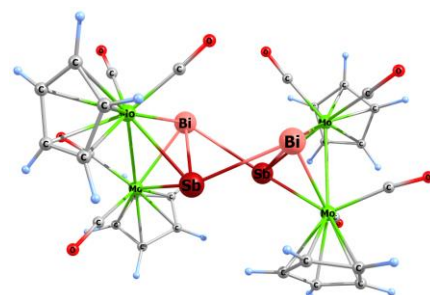

|   |             |             |              |
|---|-------------|-------------|--------------|
| H | 14.95747943 | 0.358257394 | 16.503894655 |
| C | 13.88443093 | 0.926511306 | 14.615703556 |
| H | 14.62434324 | 1.490800476 | 14.069950692 |
| C | 12.57483454 | 0.604040788 | 14.158212401 |
| H | 12.15962840 | 0.863452096 | 13.197224654 |
| C | 11.89061167 | 6.300288132 | 11.272534432 |
| H | 12.48561265 | 5.400913392 | 11.296941692 |
| C | 12.29065572 | 7.552668744 | 10.724283804 |
| H | 13.25931284 | 7.775622493 | 10.304921754 |
| C | 11.17591083 | 8.442442948 | 10.784277845 |
| H | 11.14642159 | 9.453749373 | 10.410599648 |
| C | 10.09044798 | 7.733636141 | 11.385417978 |
| H | 9.096379030 | 8.117547436 | 11.554147207 |
| C | 10.53200479 | 6.417561495 | 11.682596859 |
| H | 9.932899193 | 5.634024266 | 12.120333490 |
| C | 7.107972236 | 2.478370851 | 15.919748482 |
| H | 6.657776342 | 1.499088926 | 15.957934710 |
| C | 7.491301975 | 3.275693304 | 17.040203165 |
| H | 7.390562714 | 3.001668497 | 18.078804513 |
| C | 7.988576910 | 4.518684650 | 16.553050662 |
| H | 8.282819544 | 5.363187219 | 17.156441994 |
| C | 7.923981146 | 4.486919378 | 15.130939437 |
| H | 8.211791444 | 5.286520444 | 14.465925331 |
| C | 7.384904964 | 3.233584596 | 14.738777446 |
| H | 7.187420146 | 2.922614335 | 13.724652113 |

Selected Mayer bond orders larger than 0.100:

|                        |                        |                        |
|------------------------|------------------------|------------------------|
| B (0-Mo, 1-Mo): 0.3910 | B (0-Mo, 4-Sb): 0.7379 | B (0-Mo, 5-Bi): 0.7715 |
| B (0-Mo, 8-O): 0.1249  | B (0-Mo, 14-O): 0.1146 | B (0-Mo, 21-C): 1.1933 |
| B (0-Mo, 23-C): 0.1294 | B (0-Mo, 27-C): 1.2087 | B (0-Mo, 34-C): 0.4272 |
| B (0-Mo, 36-C): 0.4349 | B (0-Mo, 38-C): 0.4924 | B (0-Mo, 40-C): 0.4545 |
| B (0-Mo, 42-C): 0.4564 | B (1-Mo, 4-Sb): 0.7364 | B (1-Mo, 5-Bi): 0.7569 |
| B (1-Mo, 9-O): 0.1146  | B (1-Mo, 10-O): 0.1074 | B (1-Mo, 22-C): 1.1817 |
| B (1-Mo, 23-C): 1.1591 | B (1-Mo, 54-C): 0.5044 | B (1-Mo, 56-C): 0.4556 |
| B (1-Mo, 58-C): 0.4181 | B (1-Mo, 60-C): 0.3996 | B (1-Mo, 62-C): 0.4469 |
| B (2-Mo, 3-Mo): 0.3909 | B (2-Mo, 6-Sb): 0.7371 | B (2-Mo, 7-Bi): 0.7560 |
| B (2-Mo, 11-O): 0.1069 | B (2-Mo, 15-O): 0.1152 | B (2-Mo, 16-C): 1.1849 |
| B (2-Mo, 24-C): 1.1570 | B (2-Mo, 44-C): 0.4177 | B (2-Mo, 46-C): 0.4557 |
| B (2-Mo, 48-C): 0.5053 | B (2-Mo, 50-C): 0.4462 | B (2-Mo, 52-C): 0.4002 |
| B (3-Mo, 6-Sb): 0.7401 | B (3-Mo, 7-Bi): 0.7723 | B (3-Mo, 12-O): 0.1240 |
| B (3-Mo, 13-O): 0.1148 | B (3-Mo, 17-C): 0.4348 | B (3-Mo, 19-C): 0.4915 |
| B (3-Mo, 24-C): 0.1270 | B (3-Mo, 25-C): 1.1902 | B (3-Mo, 26-C): 1.2110 |
| B (3-Mo, 28-C): 0.4542 | B (3-Mo, 30-C): 0.4573 | B (3-Mo, 32-C): 0.4264 |
| B (4-Sb, 5-Bi): 0.5389 | B (4-Sb, 6-Sb): 0.4557 | B (4-Sb, 7-Bi): 0.3460 |
| B (5-Bi, 6-Sb): 0.3451 | B (5-Bi, 21-C): 0.1037 | B (5-Bi, 58-C): 0.1143 |
| B (6-Sb, 7-Bi): 0.5374 | B (7-Bi, 25-C): 0.1020 | B (7-Bi, 44-C): 0.1149 |



**Table S16:** Natural charge distribution of the E<sub>2</sub>E'<sub>2</sub> core in **1-5**, calculated at the TPSSh/def2-TZVP level.

| [(CpMo(CO) <sub>2</sub> ) <sub>2</sub> (PAs)] <sub>2</sub> <sup>2+</sup><br>(1) |             | [(CpMo(CO) <sub>2</sub> ) <sub>2</sub> (PSb)] <sub>2</sub> <sup>2+</sup><br>(2) |             | [(CpMo(CO) <sub>2</sub> ) <sub>2</sub> (AsSb)] <sub>2</sub> <sup>2+</sup><br>(3a) |             | [(CpMo(CO) <sub>2</sub> ) <sub>2</sub> (AsBi)] <sub>2</sub> <sup>2+</sup><br>(4a) |             | [(CpMo(CO) <sub>2</sub> ) <sub>2</sub> (SbBi)] <sub>2</sub> <sup>2+</sup><br>(5) |             |
|---------------------------------------------------------------------------------|-------------|---------------------------------------------------------------------------------|-------------|-----------------------------------------------------------------------------------|-------------|-----------------------------------------------------------------------------------|-------------|----------------------------------------------------------------------------------|-------------|
| Atom                                                                            | Nat. charge | Atom                                                                            | Nat. charge | Atom                                                                              | Nat. charge | Atom                                                                              | Nat. charge | Atom                                                                             | Nat. charge |
| As 5                                                                            | 0.434       | Sb 5                                                                            | 0.736       | Sb 5                                                                              | 0.565       | Bi 1                                                                              | 0.720       | Sb 5                                                                             | 0.408       |
| P 6                                                                             | 0.159       | P 6                                                                             | 0.037       | As 6                                                                              | 0.358       | As 4                                                                              | 0.286       | Bi 6                                                                             | 0.857       |
| P 7                                                                             | 0.257       | P 7                                                                             | 0.174       | Sb 7                                                                              | 0.628       | Bi 33                                                                             | 0.680       | Sb 7                                                                             | 0.412       |
| As 8                                                                            | 0.562       | Sb 8                                                                            | 0.938       | As 8                                                                              | 0.330       | As 36                                                                             | 0.318       | Bi 8                                                                             | 0.856       |
| Sum                                                                             | 1.412       | Sum                                                                             | 1.885       | Sum                                                                               | 1.882       | Sum                                                                               | 2.004       | Sum                                                                              | 2.533       |

## 9 References

- 1 X. Zheng, Z. Zhang, G. Tan and X. Wang, *Inorg. Chem.* 2016, **55**, 1008-1010.
- 2 L. Dütsch, M. Fleischmann, S. Welsch, G. Balázs, W. Kremer and M. Scheer, *Angew. Chem. Int. Ed.* 2018, **57**, 3256-3261.
- 3 L. Dütsch, C. Riesinger, G. Balázs and M. Scheer, *Chem. Eur. J.* 2021, **27**, 8804-8810.
- 4 N. G. Connelly and W. E. Geiger, *Chem. Rev.* 1996, **96**, 877-910.
- 5 Agilent (2014). CrysAlis PRO. Agilent Technologies Ltd., Yarnton, Oxfordshire, England.
- 6 G. Sheldrick, *Acta Crystallographica Section A* **2015**, **71**, 3-8.
- 7 O. V. Dolomanov, L. J. Bourhis, R. J. Gildea, J. A. K. Howard and H. Puschmann, *J. Appl. Cryst.* 2009, **42**, 339-341.
- 8 G. Sheldrick, *Acta Crystallographica Section C* 2015, **71**, 3-8.
- 9 F. Neese, *WIREs Comput. Mol. Sci.* 2018, **8**, e1327.
- 10 a) J. Tao, J. P. Perdew, V. N. Staroverov, G. E. Scuseria, *Phys. Rev. Lett.* **2003**, **91**, 146401; b) V. N. Staroverov, G. E. Scuseria, J. Tao and J. P. Perdew, *J. Chem. Phys.* 2003, **119**, 12129-12137; Erratum: *J. Chem. Phys.* 2004, **121**, 11507.
- 11 a) F. Weigend, M. Häser, H. Patzelt and R. Ahlrichs, *Chem. Phys. Lett.* 1998, **294**, 143; b) F. Weigend and R. Ahlrichs, *PCCP* 2005, **7**, 3297-3305.
- 12 a) A. D. Becke, *Physical Review A* 1988, **38**, 3098-3100; b) J. P. Perdew, *Physical Review B* 1986, **33**, 8822-8824; Erratum: *Physical Review B* 1986, **8834**, 7406.
- 13 F. Neese, F. Wennmohs, A. Hansen and U. Becker, *Chem. Phys.* 2009, **356**, 98.
- 14 E. Caldeweyher, S. Ehlert, A. Hansen, H. Neugebauer, S. Spicher, C. Bannwarth and S. Grimme, *J. Chem. Phys.* 2019, **150**, 154122.
- 15 V. Barone and M. Cossi, *J. Phys. Chem. A* 1998, **102**, 1995-2001.
- 16 a) P. J. Stephens, F. J. Devlin, C. F. Chabalowski and M. J. Frisch, *J. Phys. Chem.* 1994, **98**, 11623-11627; b) C. Lee, W. Yang and R. G. Parr, *Physical Review B* 1988, **37**, 785-789.
- 17 G. Knizia, *J. Chem. Theory Comput.* 2013, **9**, 4834-4843.
